# Supplementary material for: A chemoselective reaction between protein N-homocysteinylation and azides catalyzed by heme(ii)
Source: Royal Society of Chemistry journal article supplement (doi:10.1039/c9cc00055k), 2019-01-01
Supplement: c9cc00055k2.xlsx [file c9cc00055k2.xlsx]

## Sheet: R1
Protein AC	Charge	Sq	Mod_Sites	Score	Spectra Mass	Theory Sq Mass	Delta Mass	Delta Mass (PPM)	Target_Decoy
sp|P02769|ALBU_BOVIN	3	HLVDEPQNLIKQNCDQFEK	0,Acetyl[AnyN-term]#0;11,HTL_AC_azide#0;14,Carbamidomethyl[C]#0;	0.0739	2612.26	2612.25	0.00913	3.5	TRUE
	3	EYEATLEECCAKDDPHACYSTVFDK	0,Acetyl[AnyN-term]#0;12,HTL_AC_azide#0;18,Carbamidomethyl[C]#0;	0.00544	3181.36	3181.31	0.04811	15.12	TRUE
	4	EYEATLEECCAKDDPHACYSTVFDK	0,Acetyl[AnyN-term]#0;12,HTL_AC_azide#0;18,Carbamidomethyl[C]#0;	0.0106	3181.28	3181.31	-0.03812	-11.98	TRUE
	3	EYEATLEECCAKDDPHACYSTVFDK	0,Acetyl[AnyN-term]#0;12,HTL_AC_azide#0;18,Carbamidomethyl[C]#0;	0.372	3181.28	3181.31	-0.0351	-11.03	TRUE
	3	TVMENFVAFVDKCCAADDKEACFAVEGPK	0,Acetyl[AnyN-term]#0;12,HTL_AC_azide#0;22,Carbamidomethyl[C]#0;	0.000105	3451.57	3451.54	0.02931	8.49	TRUE
	4	TVMENFVAFVDKCCAADDKEACFAVEGPK	0,Acetyl[AnyN-term]#0;12,HTL_AC_azide#0;22,Carbamidomethyl[C]#0;	0.00018	3451.57	3451.54	0.02672	7.74	TRUE
	3	TVMENFVAFVDKCCAADDKEACFAVEGPK	0,Acetyl[AnyN-term]#0;12,HTL_AC_azide#0;22,Carbamidomethyl[C]#0;	0.00206	3451.57	3451.54	0.03331	9.65	TRUE
	4	TVMENFVAFVDKCCAADDKEACFAVEGPK	0,Acetyl[AnyN-term]#0;12,HTL_AC_azide#0;22,Carbamidomethyl[C]#0;	0.0393	3451.51	3451.54	-0.03099	-8.98	TRUE
	4	TVMENFVAFVDKCCAADDKEACFAVEGPK	0,Acetyl[AnyN-term]#0;12,HTL_AC_azide#0;22,Carbamidomethyl[C]#0;	0.0643	3451.56	3451.54	0.025	7.24	TRUE
	4	LAKEYEATLEECCAKDDPHACYSTVFDK	0,Acetyl[AnyN-term]#0;15,HTL_AC_azide#0;21,Carbamidomethyl[C]#0;	0.386	3493.5	3493.53	-0.03497	-10.01	TRUE
	3	FKDLGEEHFK	0,Acetyl[AnyN-term]#0;2,HTL_AC_azide#0;	0.0253	1506.71	1506.73	-0.01762	-11.7	TRUE
	3	LKECCDKPLLEK	0,Acetyl[AnyN-term]#0;2,HTL_AC_azide#0;4,Carbamidomethyl[C]#0;	0.0584	1732.85	1732.87	-0.01924	-11.1	TRUE
	3	QNCDQFEKLGEYGFQNALIVR	0,Acetyl[AnyN-term]#0;3,Carbamidomethyl[C]#0;8,HTL_AC_azide#0;	0.000131	2786.37	2786.33	0.04668	16.75	TRUE
	2	VTKCCTESLVNR	0,Acetyl[AnyN-term]#0;3,HTL_AC_azide#0;	0.115	1609.78	1609.77	0.0038	2.36	TRUE
	4	VHKECCHGDLLECADDRADLAK	0,Acetyl[AnyN-term]#0;3,HTL_AC_azide#0;13,Carbamidomethyl[C]#0;	0.000938	2755.27	2755.23	0.04097	14.87	TRUE
	4	VHKECCHGDLLECADDRADLAK	0,Acetyl[AnyN-term]#0;3,HTL_AC_azide#0;13,Carbamidomethyl[C]#0;	0.0465	2755.19	2755.23	-0.03812	-13.83	TRUE
	3	VHKECCHGDLLECADDRADLAK	0,Acetyl[AnyN-term]#0;3,HTL_AC_azide#0;13,Carbamidomethyl[C]#0;	0.0641	2755.28	2755.23	0.0467	16.95	TRUE
	3	VHKECCHGDLLECADDR	0,Acetyl[AnyN-term]#0;3,HTL_AC_azide#0;13,Carbamidomethyl[C]#0;	0.155	2256.99	2256.95	0.03869	17.14	TRUE
	3	VTKCCTESLVNR	0,Acetyl[AnyN-term]#0;3,HTL_AC_azide#0;4,Carbamidomethyl[C]#0;	0.0492	1666.81	1666.8	0.01018	6.11	TRUE
	3	VTKCCTESLVNR	0,Acetyl[AnyN-term]#0;3,HTL_AC_azide#0;5,Carbamidomethyl[C]#0;	0.19	1666.8	1666.8	0.0067	4.02	TRUE
	3	VTKCCTESLVNR	0,Acetyl[AnyN-term]#0;3,HTL_AC_azide#0;5,Carbamidomethyl[C]#0;	0.244	1666.8	1666.8	0.00816	4.9	TRUE
	3	DTHKSEIAHR	0,Acetyl[AnyN-term]#0;4,HTL_AC_azide#0;	0.203	1450.7	1450.71	-0.01098	-7.57	TRUE
	3	DTHKSEIAHR	0,Acetyl[AnyN-term]#0;4,HTL_AC_azide#0;	0.272	1450.7	1450.71	-0.00834	-5.75	TRUE
	2	CCAADDKEACFAVEGPK	0,Acetyl[AnyN-term]#0;7,HTL_AC_azide#0;10,Carbamidomethyl[C]#0;	0.213	2070.86	2070.86	-0.00375	-1.81	TRUE
	2	CCAADDKEACFAVEGPK	0,Acetyl[AnyN-term]#0;7,HTL_AC_azide#0;10,Carbamidomethyl[C]#0;	0.38	2070.9	2070.86	0.03896	18.81	TRUE
	3	QNCDQFEKLGEYGFQNALIVR	0,Acetyl[AnyN-term]#0;8,HTL_AC_azide#0;	0.000656	2729.29	2729.31	-0.02005	-7.35	TRUE
	3	QNCDQFEKLGEYGFQNALIVR	0,Acetyl[AnyN-term]#0;8,HTL_AC_azide#0;	0.00619	2729.3	2729.31	-0.00111	-0.41	TRUE
	4	SHCIAEVEKDAIPENLPPLTADFAEDKDVCK	0,Acetyl[AnyN-term]#0;9,HTL_AC_azide#0;30,Carbamidomethyl[C]#0;	0.221	3711.8	3711.76	0.04188	11.28	TRUE
	3	CCTKPESER	1,Carbamidomethyl[C]#0;2,Carbamidomethyl[C]#0;4,HTL_AC_azide#0;	0.00106	1381.59	1381.59	0.00354	2.57	TRUE
	2	CCTKPESER	1,Carbamidomethyl[C]#0;2,Carbamidomethyl[C]#0;4,HTL_AC_azide#0;	0.00426	1381.59	1381.59	0.00109	0.79	TRUE
	2	CCTKPESER	1,Carbamidomethyl[C]#0;2,Carbamidomethyl[C]#0;4,HTL_AC_azide#0;	0.00452	1381.59	1381.59	0.00175	1.27	TRUE
	3	CCTKPESER	1,Carbamidomethyl[C]#0;2,Carbamidomethyl[C]#0;4,HTL_AC_azide#0;	0.0252	1381.59	1381.59	0.00209	1.51	TRUE
	3	CCTKPESER	1,Carbamidomethyl[C]#0;2,Carbamidomethyl[C]#0;4,HTL_AC_azide#0;	0.0402	1381.59	1381.59	0.00272	1.97	TRUE
	3	CCTKPESER	1,Carbamidomethyl[C]#0;2,Carbamidomethyl[C]#0;4,HTL_AC_azide#0;	0.0442	1381.59	1381.59	0.00308	2.23	TRUE
	3	CCTKPESER	1,Carbamidomethyl[C]#0;2,Carbamidomethyl[C]#0;4,HTL_AC_azide#0;	0.0443	1381.59	1381.59	0.00311	2.25	TRUE
	3	CCTKPESER	1,Carbamidomethyl[C]#0;2,Carbamidomethyl[C]#0;4,HTL_AC_azide#0;	0.0528	1381.59	1381.59	0.00211	1.52	TRUE
	3	CCTKPESER	1,Carbamidomethyl[C]#0;2,Carbamidomethyl[C]#0;4,HTL_AC_azide#0;	0.0599	1381.59	1381.59	0.00159	1.15	TRUE
	3	CCTKPESER	1,Carbamidomethyl[C]#0;2,Carbamidomethyl[C]#0;4,HTL_AC_azide#0;	0.0622	1381.59	1381.59	0.00156	1.13	TRUE
	3	CCTKPESER	1,Carbamidomethyl[C]#0;2,Carbamidomethyl[C]#0;4,HTL_AC_azide#0;	0.0638	1381.59	1381.59	0.00186	1.35	TRUE
	3	CCTKPESER	1,Carbamidomethyl[C]#0;2,Carbamidomethyl[C]#0;4,HTL_AC_azide#0;	0.0642	1381.59	1381.59	0.00089	0.64	TRUE
	3	CCTKPESER	1,Carbamidomethyl[C]#0;2,Carbamidomethyl[C]#0;4,HTL_AC_azide#0;	0.0646	1381.59	1381.59	0.00356	2.58	TRUE
	3	CCTKPESER	1,Carbamidomethyl[C]#0;2,Carbamidomethyl[C]#0;4,HTL_AC_azide#0;	0.0759	1381.59	1381.59	0.00079	0.57	TRUE
	3	CCTKPESER	1,Carbamidomethyl[C]#0;2,Carbamidomethyl[C]#0;4,HTL_AC_azide#0;	0.0917	1381.59	1381.59	0.00209	1.51	TRUE
	3	CCTKPESER	1,Carbamidomethyl[C]#0;2,Carbamidomethyl[C]#0;4,HTL_AC_azide#0;	0.132	1381.59	1381.59	0.00265	1.91	TRUE
	3	CCTKPESER	1,Carbamidomethyl[C]#0;2,Carbamidomethyl[C]#0;4,HTL_AC_azide#0;	0.155	1381.59	1381.59	-0.00033	-0.24	TRUE
	3	CCTKPESER	1,Carbamidomethyl[C]#0;2,Carbamidomethyl[C]#0;4,HTL_AC_azide#0;	0.217	1381.59	1381.59	0.00307	2.22	TRUE
	3	CCTKPESER	1,Carbamidomethyl[C]#0;2,Carbamidomethyl[C]#0;4,HTL_AC_azide#0;	0.273	1381.59	1381.59	0.00259	1.88	TRUE
	3	CCTKPESER	1,Carbamidomethyl[C]#0;2,Carbamidomethyl[C]#0;4,HTL_AC_azide#0;	0.322	1381.59	1381.59	0.00233	1.69	TRUE
	2	CCTKPESER	1,Carbamidomethyl[C]#0;2,Carbamidomethyl[C]#0;4,HTL_AC_azide#0;	0.373	1381.59	1381.59	0.00406	2.94	TRUE
	3	CCTKPESER	1,Carbamidomethyl[C]#0;4,HTL_AC_azide#0;	0.336	1324.56	1324.57	-0.00849	-6.41	TRUE
	2	CASIQKFGER	1,Carbamidomethyl[C]#0;6,HTL_AC_azide#0;	0.000956	1410.69	1410.69	0.00135	0.96	TRUE
	3	CASIQKFGER	1,Carbamidomethyl[C]#0;6,HTL_AC_azide#0;	0.00148	1410.69	1410.69	0.00357	2.53	TRUE
	2	CASIQKFGER	1,Carbamidomethyl[C]#0;6,HTL_AC_azide#0;	0.0263	1410.69	1410.69	0.00152	1.08	TRUE
	3	CASIQKFGER	1,Carbamidomethyl[C]#0;6,HTL_AC_azide#0;	0.0711	1410.69	1410.69	0.00192	1.36	TRUE
	3	CASIQKFGER	1,Carbamidomethyl[C]#0;6,HTL_AC_azide#0;	0.073	1410.69	1410.69	-0.00012	-0.08	TRUE
	3	CASIQKFGER	1,Carbamidomethyl[C]#0;6,HTL_AC_azide#0;	0.0734	1410.69	1410.69	0.00215	1.52	TRUE
	3	CASIQKFGER	1,Carbamidomethyl[C]#0;6,HTL_AC_azide#0;	0.0737	1410.69	1410.69	0.00188	1.33	TRUE
	3	CASIQKFGER	1,Carbamidomethyl[C]#0;6,HTL_AC_azide#0;	0.124	1410.69	1410.69	0.00416	2.95	TRUE
	3	CASIQKFGER	1,Carbamidomethyl[C]#0;6,HTL_AC_azide#0;	0.175	1410.69	1410.69	0.00256	1.82	TRUE
	3	CASIQKFGER	1,Carbamidomethyl[C]#0;6,HTL_AC_azide#0;	0.192	1410.69	1410.69	0.0037	2.62	TRUE
	3	CASIQKFGER	1,Carbamidomethyl[C]#0;6,HTL_AC_azide#0;	0.292	1410.69	1410.69	0.00145	1.02	TRUE
	3	CASIQKFGER	1,Carbamidomethyl[C]#0;6,HTL_AC_azide#0;	0.303	1410.69	1410.69	0.00377	2.67	TRUE
	3	KSEIAHR	1,HTL_AC_azide#0;	0.0443	1055.57	1055.57	0.00168	1.59	TRUE
	3	KVPQVSTPTLVEVSR	1,HTL_AC_azide#0;	7.18e-06	1855.04	1855.04	0.00496	2.67	TRUE
	3	KVPQVSTPTLVEVSR	1,HTL_AC_azide#0;	6.75e-05	1855.04	1855.04	0.00594	3.2	TRUE
	3	KVPQVSTPTLVEVSR	1,HTL_AC_azide#0;	0.00112	1855.04	1855.04	0.0087	4.69	TRUE
	2	KVPQVSTPTLVEVSR	1,HTL_AC_azide#0;	0.013	1855.04	1855.04	0.00444	2.39	TRUE
	2	KQTALVELLK	1,HTL_AC_azide#0;	7.37e-05	1357.81	1357.81	0.00204	1.5	TRUE
	2	KQTALVELLK	1,HTL_AC_azide#0;	7.52e-05	1357.81	1357.81	0.002	1.47	TRUE
	3	KFWGKYLYEIAR	1,HTL_AC_azide#0;	0.000178	1788.95	1788.95	0.00403	2.25	TRUE
	2	KQTALVELLK	1,HTL_AC_azide#0;	0.000184	1357.81	1357.81	0.0019	1.4	TRUE
	3	KFWGKYLYEIAR	1,HTL_AC_azide#0;	0.000216	1788.95	1788.95	0.00337	1.88	TRUE
	3	KQTALVELLK	1,HTL_AC_azide#0;	0.000241	1357.82	1357.81	0.00275	2.03	TRUE
	2	KQTALVELLK	1,HTL_AC_azide#0;	0.000262	1357.81	1357.81	0.00204	1.5	TRUE
	3	KQTALVELLK	1,HTL_AC_azide#0;	0.00027	1357.81	1357.81	0.00245	1.81	TRUE
	3	KQTALVELLK	1,HTL_AC_azide#0;	0.000293	1357.81	1357.81	0.00235	1.73	TRUE
	3	KQTALVELLK	1,HTL_AC_azide#0;	0.000296	1357.82	1357.81	0.00323	2.38	TRUE
	3	KQTALVELLK	1,HTL_AC_azide#0;	0.000314	1357.82	1357.81	0.00297	2.18	TRUE
	3	KQTALVELLK	1,HTL_AC_azide#0;	0.000335	1357.82	1357.81	0.00382	2.81	TRUE
	3	KQTALVELLK	1,HTL_AC_azide#0;	0.00034	1357.82	1357.81	0.00274	2.02	TRUE
	3	KQTALVELLK	1,HTL_AC_azide#0;	0.000341	1357.81	1357.81	0.00255	1.88	TRUE
	3	KFWGKYLYEIAR	1,HTL_AC_azide#0;	0.000347	1788.96	1788.95	0.00492	2.75	TRUE
	3	KQTALVELLK	1,HTL_AC_azide#0;	0.000364	1357.81	1357.81	0.00241	1.78	TRUE
	2	KQTALVELLK	1,HTL_AC_azide#0;	0.000368	1357.82	1357.81	0.00318	2.34	TRUE
	3	KQTALVELLK	1,HTL_AC_azide#0;	0.000377	1357.82	1357.81	0.00318	2.34	TRUE
	3	KQTALVELLK	1,HTL_AC_azide#0;	0.000398	1357.82	1357.81	0.00309	2.27	TRUE
	2	KQTALVELLK	1,HTL_AC_azide#0;	0.000503	1357.82	1357.81	0.00324	2.39	TRUE
	3	KQTALVELLK	1,HTL_AC_azide#0;	0.000532	1357.82	1357.81	0.00298	2.19	TRUE
	2	KQTALVELLK	1,HTL_AC_azide#0;	0.000541	1357.82	1357.81	0.00282	2.07	TRUE
	2	KQTALVELLK	1,HTL_AC_azide#0;	0.000559	1357.82	1357.81	0.00321	2.37	TRUE
	3	KQTALVELLK	1,HTL_AC_azide#0;	0.000561	1357.82	1357.81	0.00283	2.08	TRUE
	3	KQTALVELLK	1,HTL_AC_azide#0;	0.000569	1357.81	1357.81	0.00179	1.32	TRUE
	2	KQTALVELLK	1,HTL_AC_azide#0;	0.000582	1357.82	1357.81	0.0039	2.87	TRUE
	3	KQTALVELLK	1,HTL_AC_azide#0;	0.000593	1357.81	1357.81	0.00267	1.97	TRUE
	2	KQTALVELLK	1,HTL_AC_azide#0;	0.000612	1357.81	1357.81	0.00178	1.31	TRUE
	3	KQTALVELLK	1,HTL_AC_azide#0;	0.000644	1357.82	1357.81	0.00347	2.56	TRUE
	3	KQTALVELLK	1,HTL_AC_azide#0;	0.000677	1357.82	1357.81	0.00278	2.05	TRUE
	2	KQTALVELLK	1,HTL_AC_azide#0;	0.000699	1357.82	1357.81	0.00333	2.45	TRUE
	2	KQTALVELLK	1,HTL_AC_azide#0;	0.00074	1357.81	1357.81	0.00234	1.72	TRUE
	2	KQTALVELLK	1,HTL_AC_azide#0;	0.000768	1357.81	1357.81	0.00207	1.53	TRUE
	2	KQTALVELLK	1,HTL_AC_azide#0;	0.00077	1357.81	1357.81	0.00152	1.12	TRUE
	3	KQTALVELLK	1,HTL_AC_azide#0;	0.000774	1357.82	1357.81	0.00382	2.81	TRUE
	3	KQTALVELLK	1,HTL_AC_azide#0;	0.000818	1357.81	1357.81	0.00246	1.81	TRUE
	3	KQTALVELLK	1,HTL_AC_azide#0;	0.000883	1357.81	1357.81	0.00065	0.48	TRUE
	2	KQTALVELLK	1,HTL_AC_azide#0;	0.00095	1357.82	1357.81	0.00318	2.34	TRUE
	3	KQTALVELLK	1,HTL_AC_azide#0;	0.00101	1357.82	1357.81	0.00378	2.79	TRUE
	3	KQTALVELLK	1,HTL_AC_azide#0;	0.00107	1357.82	1357.81	0.00366	2.69	TRUE
	3	KQTALVELLK	1,HTL_AC_azide#0;	0.00112	1357.82	1357.81	0.00415	3.05	TRUE
	2	KQTALVELLK	1,HTL_AC_azide#0;	0.00112	1357.81	1357.81	0.00268	1.97	TRUE
	3	KQTALVELLK	1,HTL_AC_azide#0;	0.00115	1357.81	1357.81	0.00224	1.65	TRUE
	2	KQTALVELLK	1,HTL_AC_azide#0;	0.00123	1357.82	1357.81	0.00278	2.05	TRUE
	3	KQTALVELLK	1,HTL_AC_azide#0;	0.00123	1357.82	1357.81	0.0034	2.51	TRUE
	3	KQTALVELLK	1,HTL_AC_azide#0;	0.00124	1357.82	1357.81	0.00337	2.48	TRUE
	3	KQTALVELLK	1,HTL_AC_azide#0;	0.00128	1357.81	1357.81	0.00228	1.68	TRUE
	2	KQTALVELLK	1,HTL_AC_azide#0;	0.00132	1357.82	1357.81	0.00438	3.22	TRUE
	3	KQTALVELLK	1,HTL_AC_azide#0;	0.00143	1357.82	1357.81	0.00322	2.37	TRUE
	2	KQTALVELLK	1,HTL_AC_azide#0;	0.00146	1357.81	1357.81	-0.00099	-0.73	TRUE
	2	KQTALVELLK	1,HTL_AC_azide#0;	0.00162	1357.82	1357.81	0.00366	2.7	TRUE
	3	KQTALVELLK	1,HTL_AC_azide#0;	0.00167	1357.81	1357.81	0.00171	1.26	TRUE
	2	KQTALVELLK	1,HTL_AC_azide#0;	0.00175	1357.82	1357.81	0.00487	3.59	TRUE
	2	KQTALVELLK	1,HTL_AC_azide#0;	0.00177	1357.82	1357.81	0.00296	2.18	TRUE
	2	KQTALVELLK	1,HTL_AC_azide#0;	0.00184	1357.82	1357.81	0.00309	2.28	TRUE
	3	KQTALVELLK	1,HTL_AC_azide#0;	0.00192	1357.82	1357.81	0.00385	2.83	TRUE
	2	KQTALVELLK	1,HTL_AC_azide#0;	0.00194	1357.82	1357.81	0.00326	2.4	TRUE
	3	KQTALVELLK	1,HTL_AC_azide#0;	0.00198	1357.82	1357.81	0.00369	2.72	TRUE
	3	KQTALVELLK	1,HTL_AC_azide#0;	0.00202	1357.81	1357.81	0.00119	0.88	TRUE
	2	KQTALVELLK	1,HTL_AC_azide#0;	0.00209	1357.81	1357.81	0.00249	1.83	TRUE
	2	KQTALVELLK	1,HTL_AC_azide#0;	0.00229	1357.82	1357.81	0.00486	3.58	TRUE
	3	KQTALVELLK	1,HTL_AC_azide#0;	0.00236	1357.82	1357.81	0.00498	3.67	TRUE
	3	KQTALVELLK	1,HTL_AC_azide#0;	0.00244	1357.81	1357.81	0.00085	0.62	TRUE
	3	KQTALVELLK	1,HTL_AC_azide#0;	0.00299	1357.82	1357.81	0.00367	2.71	TRUE
	2	KQTALVELLK	1,HTL_AC_azide#0;	0.00353	1357.82	1357.81	0.00553	4.07	TRUE
	3	KQTALVELLK	1,HTL_AC_azide#0;	0.00436	1357.82	1357.81	0.00306	2.26	TRUE
	2	KQTALVELLK	1,HTL_AC_azide#0;	0.00439	1357.82	1357.81	0.00718	5.29	TRUE
	2	KQTALVELLK	1,HTL_AC_azide#0;	0.0045	1357.82	1357.81	0.00501	3.69	TRUE
	2	KQTALVELLK	1,HTL_AC_azide#0;	0.00455	1357.81	1357.81	0.00061	0.45	TRUE
	3	KQTALVELLK	1,HTL_AC_azide#0;	0.00457	1357.81	1357.81	0.00236	1.74	TRUE
	3	KQTALVELLK	1,HTL_AC_azide#0;	0.00462	1357.81	1357.81	0.00155	1.14	TRUE
	2	KQTALVELLK	1,HTL_AC_azide#0;	0.00496	1357.82	1357.81	0.00281	2.07	TRUE
	3	KQTALVELLK	1,HTL_AC_azide#0;	0.00507	1357.82	1357.81	0.00547	4.03	TRUE
	2	KQTALVELLK	1,HTL_AC_azide#0;	0.00563	1357.82	1357.81	0.00758	5.58	TRUE
	2	KQTALVELLK	1,HTL_AC_azide#0;	0.00586	1357.82	1357.81	0.00284	2.09	TRUE
	3	KQTALVELLK	1,HTL_AC_azide#0;	0.00661	1357.82	1357.81	0.00554	4.08	TRUE
	2	KQTALVELLK	1,HTL_AC_azide#0;	0.00686	1357.82	1357.81	0.00282	2.07	TRUE
	2	KQTALVELLK	1,HTL_AC_azide#0;	0.007	1357.82	1357.81	0.00765	5.63	TRUE
	2	KQTALVELLK	1,HTL_AC_azide#0;	0.00727	1357.82	1357.81	0.00672	4.95	TRUE
	3	KQTALVELLK	1,HTL_AC_azide#0;	0.00734	1357.81	1357.81	0.00139	1.02	TRUE
	2	KQTALVELLK	1,HTL_AC_azide#0;	0.00787	1357.82	1357.81	0.00464	3.42	TRUE
	2	KQTALVELLK	1,HTL_AC_azide#0;	0.00908	1357.82	1357.81	0.00908	6.69	TRUE
	2	KQTALVELLK	1,HTL_AC_azide#0;	0.00909	1357.82	1357.81	0.00471	3.47	TRUE
	2	KQTALVELLK	1,HTL_AC_azide#0;	0.00945	1357.82	1357.81	0.00345	2.54	TRUE
	2	KQTALVELLK	1,HTL_AC_azide#0;	0.0105	1357.81	1357.81	0.00251	1.85	TRUE
	2	KQTALVELLK	1,HTL_AC_azide#0;	0.0108	1357.82	1357.81	0.00579	4.26	TRUE
	2	KQTALVELLK	1,HTL_AC_azide#0;	0.0119	1357.82	1357.81	0.00507	3.73	TRUE
	2	KQTALVELLK	1,HTL_AC_azide#0;	0.0132	1357.82	1357.81	0.00466	3.43	TRUE
	4	KFWGKYLYEIAR	1,HTL_AC_azide#0;	0.0135	1788.95	1788.95	0.00444	2.48	TRUE
	2	KQTALVELLK	1,HTL_AC_azide#0;	0.0158	1357.82	1357.81	0.00676	4.98	TRUE
	3	KFWGKYLYEIAR	1,HTL_AC_azide#0;	0.0161	1788.95	1788.95	0.00316	1.77	TRUE
	2	KQTALVELLK	1,HTL_AC_azide#0;	0.0169	1357.82	1357.81	0.00745	5.49	TRUE
	2	KQTALVELLK	1,HTL_AC_azide#0;	0.0182	1357.82	1357.81	0.00448	3.3	TRUE
	3	KQTALVELLK	1,HTL_AC_azide#0;	0.0215	1357.81	1357.81	0.00243	1.79	TRUE
	2	KQTALVELLK	1,HTL_AC_azide#0;	0.0221	1357.82	1357.81	0.00378	2.78	TRUE
	2	KQTALVELLK	1,HTL_AC_azide#0;	0.0226	1357.82	1357.81	0.00589	4.34	TRUE
	2	KQTALVELLK	1,HTL_AC_azide#0;	0.0275	1357.82	1357.81	0.00688	5.07	TRUE
	3	KQTALVELLK	1,HTL_AC_azide#0;	0.0314	1357.81	1357.81	0.00122	0.9	TRUE
	2	KQTALVELLK	1,HTL_AC_azide#0;	0.034	1357.82	1357.81	0.00736	5.42	TRUE
	3	KQTALVELLK	1,HTL_AC_azide#0;	0.0373	1357.82	1357.81	0.00913	6.72	TRUE
	3	KQTALVELLK	1,HTL_AC_azide#0;	0.0503	1357.82	1357.81	0.00365	2.69	TRUE
	2	KQTALVELLK	1,HTL_AC_azide#0;	0.0613	1357.82	1357.81	0.00635	4.68	TRUE
	2	KQTALVELLK	1,HTL_AC_azide#0;	0.0782	1357.81	1357.81	0.00135	0.99	TRUE
	2	KQTALVELLK	1,HTL_AC_azide#0;	0.127	1357.81	1357.81	0.0018	1.32	TRUE
	2	KQTALVELLK	1,HTL_AC_azide#0;	0.142	1357.82	1357.81	0.00406	2.99	TRUE
	2	KQTALVELLK	1,HTL_AC_azide#0;	0.155	1357.82	1357.81	0.00646	4.76	TRUE
	2	KQTALVELLK	1,HTL_AC_azide#0;	0.167	1357.82	1357.81	0.00436	3.21	TRUE
	2	KQTALVELLK	1,HTL_AC_azide#0;	0.184	1357.82	1357.81	0.00411	3.02	TRUE
	2	KQTALVELLK	1,HTL_AC_azide#0;	0.201	1357.81	1357.81	0.00218	1.61	TRUE
	2	KQTALVELLK	1,HTL_AC_azide#0;	0.202	1357.82	1357.81	0.00816	6.01	TRUE
	2	KQTALVELLK	1,HTL_AC_azide#0;	0.221	1357.81	1357.81	0.00268	1.97	TRUE
	2	KQTALVELLK	1,HTL_AC_azide#0;	0.224	1357.81	1357.81	0.00213	1.57	TRUE
	2	KQTALVELLK	1,HTL_AC_azide#0;	0.225	1357.82	1357.81	0.00433	3.19	TRUE
	2	KQTALVELLK	1,HTL_AC_azide#0;	0.273	1357.81	1357.81	0.0018	1.33	TRUE
	2	KQTALVELLK	1,HTL_AC_azide#0;	0.276	1357.82	1357.81	0.00725	5.34	TRUE
	2	KQTALVELLK	1,HTL_AC_azide#0;	0.281	1357.81	1357.81	0.00179	1.32	TRUE
	2	KQTALVELLK	1,HTL_AC_azide#0;	0.309	1357.82	1357.81	0.00376	2.77	TRUE
	2	KQTALVELLK	1,HTL_AC_azide#0;	0.313	1357.82	1357.81	0.00528	3.89	TRUE
	2	KQTALVELLK	1,HTL_AC_azide#0;	0.385	1357.81	1357.81	0.00225	1.66	TRUE
	3	KGLVLIAFSQYLQQCPFDEHVK	1,HTL_AC_azide#0;15,Carbamidomethyl[C]#0;	0.261	2835.51	2835.46	0.05236	18.46	TRUE
	3	LVNELTEFAKTCVADESHAGCEK	10,HTL_AC_azide#0;12,Carbamidomethyl[C]#0;21,Carbamidomethyl[C]#0;	1.73e-09	2823.3	2823.3	-0.00222	-0.79	TRUE
	3	LVNELTEFAKTCVADESHAGCEK	10,HTL_AC_azide#0;12,Carbamidomethyl[C]#0;21,Carbamidomethyl[C]#0;	2.02e-09	2823.31	2823.3	0.009	3.19	TRUE
	3	LVNELTEFAKTCVADESHAGCEK	10,HTL_AC_azide#0;12,Carbamidomethyl[C]#0;21,Carbamidomethyl[C]#0;	6.48e-08	2823.3	2823.3	-0.00093	-0.33	TRUE
	4	LVNELTEFAKTCVADESHAGCEK	10,HTL_AC_azide#0;12,Carbamidomethyl[C]#0;21,Carbamidomethyl[C]#0;	1.62e-06	2823.3	2823.3	0.0013	0.46	TRUE
	4	LVNELTEFAKTCVADESHAGCEK	10,HTL_AC_azide#0;12,Carbamidomethyl[C]#0;21,Carbamidomethyl[C]#0;	9.73e-05	2823.3	2823.3	0.00282	1	TRUE
	4	LVNELTEFAKTCVADESHAGCEK	10,HTL_AC_azide#0;12,Carbamidomethyl[C]#0;21,Carbamidomethyl[C]#0;	0.000523	2823.31	2823.3	0.00549	1.94	TRUE
	3	LVNELTEFAKTCVADESHAGCEK	10,HTL_AC_azide#0;12,Carbamidomethyl[C]#0;21,Carbamidomethyl[C]#0;	0.00381	2823.3	2823.3	-0.00061	-0.22	TRUE
	3	LVNELTEFAKTCVADESHAGCEK	10,HTL_AC_azide#0;12,Carbamidomethyl[C]#0;21,Carbamidomethyl[C]#0;	0.00593	2823.31	2823.3	0.00824	2.92	TRUE
	3	SLHTLFGDELCKVASLR	11,Carbamidomethyl[C]#0;12,HTL_AC_azide#0;	0.000137	2161.12	2161.11	0.00379	1.75	TRUE
	4	SLHTLFGDELCKVASLR	11,Carbamidomethyl[C]#0;12,HTL_AC_azide#0;	0.000149	2161.12	2161.11	0.00571	2.64	TRUE
	4	SLHTLFGDELCKVASLR	11,Carbamidomethyl[C]#0;12,HTL_AC_azide#0;	0.000299	2161.12	2161.11	0.00478	2.21	TRUE
	4	SLHTLFGDELCKVASLR	11,Carbamidomethyl[C]#0;12,HTL_AC_azide#0;	0.000431	2161.12	2161.11	0.00497	2.3	TRUE
	4	SLHTLFGDELCKVASLR	11,Carbamidomethyl[C]#0;12,HTL_AC_azide#0;	0.000959	2161.12	2161.11	0.00302	1.4	TRUE
	3	SLHTLFGDELCKVASLR	11,Carbamidomethyl[C]#0;12,HTL_AC_azide#0;	0.0011	2161.12	2161.11	0.00185	0.86	TRUE
	3	SLHTLFGDELCKVASLR	11,Carbamidomethyl[C]#0;12,HTL_AC_azide#0;	0.00156	2161.12	2161.11	0.00564	2.61	TRUE
	4	SLHTLFGDELCKVASLR	11,Carbamidomethyl[C]#0;12,HTL_AC_azide#0;	0.00269	2161.12	2161.11	0.00252	1.17	TRUE
	2	SLHTLFGDELCKVASLR	11,Carbamidomethyl[C]#0;12,HTL_AC_azide#0;	0.00287	2161.12	2161.11	0.00366	1.69	TRUE
	3	SLHTLFGDELCKVASLR	11,Carbamidomethyl[C]#0;12,HTL_AC_azide#0;	0.00398	2161.12	2161.11	0.00112	0.52	TRUE
	4	SLHTLFGDELCKVASLR	11,Carbamidomethyl[C]#0;12,HTL_AC_azide#0;	0.00704	2161.12	2161.11	0.0034	1.57	TRUE
	3	SLHTLFGDELCKVASLR	11,Carbamidomethyl[C]#0;12,HTL_AC_azide#0;	0.0154	2161.12	2161.11	0.00569	2.63	TRUE
	3	SLHTLFGDELCKVASLR	11,Carbamidomethyl[C]#0;12,HTL_AC_azide#0;	0.0399	2161.12	2161.11	0.0046	2.13	TRUE
	4	SLHTLFGDELCKVASLR	11,Carbamidomethyl[C]#0;12,HTL_AC_azide#0;	0.0433	2161.12	2161.11	0.00524	2.42	TRUE
	4	SLHTLFGDELCKVASLR	11,Carbamidomethyl[C]#0;12,HTL_AC_azide#0;	0.146	2161.12	2161.11	0.00675	3.12	TRUE
	3	HLVDEPQNLIKQNCDQFEK	11,HTL_AC_azide#0;	0.00531	2513.22	2513.22	0.0051	2.03	TRUE
	3	HLVDEPQNLIKQNCDQFEK	11,HTL_AC_azide#0;14,Carbamidomethyl[C]#0;	2.03e-07	2570.24	2570.24	0.00663	2.58	TRUE
	3	HLVDEPQNLIKQNCDQFEK	11,HTL_AC_azide#0;14,Carbamidomethyl[C]#0;	1.32e-06	2570.25	2570.24	0.01036	4.03	TRUE
	3	HLVDEPQNLIKQNCDQFEK	11,HTL_AC_azide#0;14,Carbamidomethyl[C]#0;	2.6e-06	2570.25	2570.24	0.00812	3.16	TRUE
	3	HLVDEPQNLIKQNCDQFEK	11,HTL_AC_azide#0;14,Carbamidomethyl[C]#0;	2.64e-06	2570.25	2570.24	0.01063	4.14	TRUE
	4	HLVDEPQNLIKQNCDQFEK	11,HTL_AC_azide#0;14,Carbamidomethyl[C]#0;	1.04e-05	2570.25	2570.24	0.01208	4.7	TRUE
	3	HLVDEPQNLIKQNCDQFEK	11,HTL_AC_azide#0;14,Carbamidomethyl[C]#0;	0.000187	2570.24	2570.24	-0.00243	-0.95	TRUE
	3	HLVDEPQNLIKQNCDQFEK	11,HTL_AC_azide#0;14,Carbamidomethyl[C]#0;	0.000215	2570.23	2570.24	-0.00335	-1.3	TRUE
	2	HLVDEPQNLIKQNCDQFEK	11,HTL_AC_azide#0;14,Carbamidomethyl[C]#0;	0.000404	2570.25	2570.24	0.00796	3.1	TRUE
	4	HLVDEPQNLIKQNCDQFEK	11,HTL_AC_azide#0;14,Carbamidomethyl[C]#0;	0.000674	2570.25	2570.24	0.00941	3.66	TRUE
	3	HLVDEPQNLIKQNCDQFEK	11,HTL_AC_azide#0;14,Carbamidomethyl[C]#0;	0.00107	2570.24	2570.24	-0.00107	-0.42	TRUE
	3	HLVDEPQNLIKQNCDQFEK	11,HTL_AC_azide#0;14,Carbamidomethyl[C]#0;	0.00116	2570.24	2570.24	0.0069	2.69	TRUE
	4	TVMENFVAFVDKCCAADDKEACFAVEGPK	12,HTL_AC_azide#0;13,Carbamidomethyl[C]#0;22,Carbamidomethyl[C]#0;	0.265	3466.59	3466.55	0.04338	12.51	TRUE
	3	TVMENFVAFVDKCCAADDKEACFAVEGPK	12,HTL_AC_azide#0;14,Carbamidomethyl[C]#0;22,Carbamidomethyl[C]#0;	0.0495	3466.58	3466.55	0.0277	7.99	TRUE
	3	TVMENFVAFVDKCCAADDKEACFAVEGPK	12,HTL_AC_azide#0;14,Carbamidomethyl[C]#0;22,Carbamidomethyl[C]#0;	0.0732	3466.58	3466.55	0.03107	8.96	TRUE
	3	EYEATLEECCAKDDPHACYSTVFDKLK	12,HTL_AC_azide#0;18,Carbamidomethyl[C]#0;	0.00703	3380.54	3380.48	0.05316	15.72	TRUE
	4	EYEATLEECCAKDDPHACYSTVFDK	12,HTL_AC_azide#0;18,Carbamidomethyl[C]#0;	0.0703	3139.35	3139.3	0.04808	15.32	TRUE
	3	EYEATLEECCAKDDPHACYSTVFDKLK	12,HTL_AC_azide#0;18,Carbamidomethyl[C]#0;	0.207	3380.54	3380.48	0.05665	16.76	TRUE
	3	TVMENFVAFVDKCCAADDKEACFAVEGPK	12,HTL_AC_azide#0;22,Carbamidomethyl[C]#0;	5.06e-06	3409.58	3409.53	0.04949	14.51	TRUE
	3	TVMENFVAFVDKCCAADDKEACFAVEGPK	12,HTL_AC_azide#0;22,Carbamidomethyl[C]#0;	8.31e-06	3409.58	3409.53	0.04844	14.21	TRUE
	3	TVMENFVAFVDKCCAADDKEACFAVEGPK	12,HTL_AC_azide#0;22,Carbamidomethyl[C]#0;	1.54e-05	3409.58	3409.53	0.04979	14.6	TRUE
	3	TVMENFVAFVDKCCAADDKEACFAVEGPK	12,HTL_AC_azide#0;22,Carbamidomethyl[C]#0;	0.0228	3409.58	3409.53	0.0567	16.63	TRUE
	4	HPYFYAPELLYYANKYNGVFQECCQAEDK	15,HTL_AC_azide#0;23,Carbamidomethyl[C]#0;24,Carbamidomethyl[C]#0;	4.88e-05	3832.72	3832.71	0.00417	1.09	TRUE
	4	HPYFYAPELLYYANKYNGVFQECCQAEDK	15,HTL_AC_azide#0;23,Carbamidomethyl[C]#0;24,Carbamidomethyl[C]#0;	0.00237	3832.72	3832.71	0.01109	2.89	TRUE
	4	HPYFYAPELLYYANKYNGVFQECCQAEDK	15,HTL_AC_azide#0;23,Carbamidomethyl[C]#0;24,Carbamidomethyl[C]#0;	0.358	3832.72	3832.71	0.00427	1.12	TRUE
	4	HPYFYAPELLYYANKYNGVFQECCQAEDK	15,HTL_AC_azide#0;24,Carbamidomethyl[C]#0;	0.201	3775.7	3775.69	0.01352	3.58	TRUE
	4	RHPYFYAPELLYYANKYNGVFQECCQAEDK	16,HTL_AC_azide#0;	0.0539	3874.78	3874.77	0.00895	2.31	TRUE
	3	RHPYFYAPELLYYANKYNGVFQECCQAEDK	16,HTL_AC_azide#0;24,Carbamidomethyl[C]#0;25,Carbamidomethyl[C]#0;	6.06e-11	3988.83	3988.81	0.01325	3.32	TRUE
	5	RHPYFYAPELLYYANKYNGVFQECCQAEDK	16,HTL_AC_azide#0;24,Carbamidomethyl[C]#0;25,Carbamidomethyl[C]#0;	9.91e-11	3988.82	3988.81	0.01166	2.92	TRUE
	4	RHPYFYAPELLYYANKYNGVFQECCQAEDK	16,HTL_AC_azide#0;24,Carbamidomethyl[C]#0;25,Carbamidomethyl[C]#0;	3.73e-09	3988.82	3988.81	0.00722	1.81	TRUE
	4	RHPYFYAPELLYYANKYNGVFQECCQAEDK	16,HTL_AC_azide#0;24,Carbamidomethyl[C]#0;25,Carbamidomethyl[C]#0;	8.9e-09	3988.82	3988.81	0.00961	2.41	TRUE
	3	RHPYFYAPELLYYANKYNGVFQECCQAEDK	16,HTL_AC_azide#0;24,Carbamidomethyl[C]#0;25,Carbamidomethyl[C]#0;	6.34e-08	3988.83	3988.81	0.01439	3.61	TRUE
	5	RHPYFYAPELLYYANKYNGVFQECCQAEDK	16,HTL_AC_azide#0;24,Carbamidomethyl[C]#0;25,Carbamidomethyl[C]#0;	1.8e-07	3988.82	3988.81	0.01067	2.68	TRUE
	5	RHPYFYAPELLYYANKYNGVFQECCQAEDK	16,HTL_AC_azide#0;24,Carbamidomethyl[C]#0;25,Carbamidomethyl[C]#0;	6.53e-06	3988.82	3988.81	0.00493	1.24	TRUE
	4	RHPYFYAPELLYYANKYNGVFQECCQAEDK	16,HTL_AC_azide#0;24,Carbamidomethyl[C]#0;25,Carbamidomethyl[C]#0;	0.000403	3988.81	3988.81	0.00107	0.27	TRUE
	4	RHPYFYAPELLYYANKYNGVFQECCQAEDK	16,HTL_AC_azide#0;25,Carbamidomethyl[C]#0;	0.201	3931.74	3931.79	-0.04948	-12.58	TRUE
	4	RHPYFYAPELLYYANKYNGVFQECCQAEDK	16,HTL_AC_azide#0;30,HTL_AC_azide#0;	0.321	4089.89	4089.87	0.02561	6.26	TRUE
	3	DAIPENLPPLTADFAEDKDVCK	18,HTL_AC_azide#0;21,Carbamidomethyl[C]#0;	0.0144	2673.28	2673.28	0.0027	1.01	TRUE
	3	TVMENFVAFVDKCCAADDKEACFAVEGPK	19,HTL_AC_azide#0;22,Carbamidomethyl[C]#0;	0.0594	3409.59	3409.53	0.05986	17.56	TRUE
	2	LCVLHEKTPVSEK	2,Carbamidomethyl[C]#0;7,HTL_AC_azide#0;	6.38e-05	1754.92	1754.92	0.00345	1.97	TRUE
	2	LCVLHEKTPVSEK	2,Carbamidomethyl[C]#0;7,HTL_AC_azide#0;	0.00116	1754.92	1754.92	0.00175	1	TRUE
	4	LCVLHEKTPVSEK	2,Carbamidomethyl[C]#0;7,HTL_AC_azide#0;	0.00255	1754.92	1754.92	0.00448	2.55	TRUE
	3	LCVLHEKTPVSEK	2,Carbamidomethyl[C]#0;7,HTL_AC_azide#0;	0.0106	1754.92	1754.92	0.00156	0.89	TRUE
	4	LCVLHEKTPVSEK	2,Carbamidomethyl[C]#0;7,HTL_AC_azide#0;	0.0128	1754.92	1754.92	0.00404	2.3	TRUE
	4	LCVLHEKTPVSEK	2,Carbamidomethyl[C]#0;7,HTL_AC_azide#0;	0.0136	1754.92	1754.92	0.00234	1.33	TRUE
	4	LCVLHEKTPVSEK	2,Carbamidomethyl[C]#0;7,HTL_AC_azide#0;	0.0158	1754.92	1754.92	0.00246	1.4	TRUE
	3	LCVLHEKTPVSEK	2,Carbamidomethyl[C]#0;7,HTL_AC_azide#0;	0.0281	1754.92	1754.92	0.00313	1.79	TRUE
	3	LCVLHEKTPVSEK	2,Carbamidomethyl[C]#0;7,HTL_AC_azide#0;	0.0329	1754.92	1754.92	0.00284	1.62	TRUE
	4	LCVLHEKTPVSEK	2,Carbamidomethyl[C]#0;7,HTL_AC_azide#0;	0.0958	1754.92	1754.92	0.00211	1.2	TRUE
	3	LCVLHEKTPVSEK	2,Carbamidomethyl[C]#0;7,HTL_AC_azide#0;	0.212	1754.92	1754.92	0.0014	0.8	TRUE
	3	HKSEIAHR	2,HTL_AC_azide#0;	0.0425	1192.63	1192.63	0.0038	3.18	TRUE
	3	HKSEIAHR	2,HTL_AC_azide#0;	0.0522	1192.63	1192.63	0.00112	0.94	TRUE
	3	HKSEIAHR	2,HTL_AC_azide#0;	0.0801	1192.63	1192.63	0.00298	2.5	TRUE
	3	HKSEIAHR	2,HTL_AC_azide#0;	0.136	1192.63	1192.63	0.00076	0.64	TRUE
	3	HKSEIAHR	2,HTL_AC_azide#0;	0.143	1192.63	1192.63	0.00525	4.41	TRUE
	3	HKSEIAHR	2,HTL_AC_azide#0;	0.207	1192.63	1192.63	0.00083	0.7	TRUE
	3	FKDLGEEHFK	2,HTL_AC_azide#0;	0.000533	1464.72	1464.72	0.00149	1.02	TRUE
	4	FKDLGEEHFK	2,HTL_AC_azide#0;	0.0011	1464.72	1464.72	0.00205	1.4	TRUE
	3	FKDLGEEHFK	2,HTL_AC_azide#0;	0.00117	1464.72	1464.72	0.00223	1.52	TRUE
	3	FKDLGEEHFK	2,HTL_AC_azide#0;	0.00131	1464.72	1464.72	0.0021	1.44	TRUE
	3	FKDLGEEHFK	2,HTL_AC_azide#0;	0.00147	1464.72	1464.72	0.00277	1.89	TRUE
	3	FKDLGEEHFK	2,HTL_AC_azide#0;	0.00189	1464.72	1464.72	0.00466	3.18	TRUE
	3	FKDLGEEHFK	2,HTL_AC_azide#0;	0.00295	1464.72	1464.72	0.00133	0.91	TRUE
	4	FKDLGEEHFK	2,HTL_AC_azide#0;	0.00355	1464.72	1464.72	0.00147	1.01	TRUE
	3	FKDLGEEHFK	2,HTL_AC_azide#0;	0.0036	1464.72	1464.72	0.00335	2.29	TRUE
	2	LKHLVDEPQNLIK	2,HTL_AC_azide#0;	0.00403	1762	1761.99	0.00548	3.11	TRUE
	4	FKDLGEEHFK	2,HTL_AC_azide#0;	0.00437	1464.72	1464.72	0.00227	1.55	TRUE
	4	HKPKATEEQLK	2,HTL_AC_azide#0;	0.00449	1523.82	1523.82	-6e-05	-0.04	TRUE
	2	FKDLGEEHFK	2,HTL_AC_azide#0;	0.0059	1464.72	1464.72	0.00473	3.23	TRUE
	4	FKDLGEEHFK	2,HTL_AC_azide#0;	0.00601	1464.72	1464.72	0.00272	1.86	TRUE
	3	FKDLGEEHFK	2,HTL_AC_azide#0;	0.00702	1464.72	1464.72	0.00245	1.67	TRUE
	4	FKDLGEEHFK	2,HTL_AC_azide#0;	0.00838	1464.72	1464.72	0.00072	0.49	TRUE
	2	FKDLGEEHFK	2,HTL_AC_azide#0;	0.00849	1464.72	1464.72	0.00443	3.02	TRUE
	3	LKHLVDEPQNLIK	2,HTL_AC_azide#0;	0.015	1762	1761.99	0.00521	2.96	TRUE
	2	FKDLGEEHFK	2,HTL_AC_azide#0;	0.0177	1464.72	1464.72	0.00153	1.04	TRUE
	3	LKHLVDEPQNLIK	2,HTL_AC_azide#0;	0.0241	1762	1761.99	0.00568	3.22	TRUE
	3	FKDLGEEHFK	2,HTL_AC_azide#0;	0.0412	1464.72	1464.72	0.00116	0.79	TRUE
	2	FKDLGEEHFK	2,HTL_AC_azide#0;	0.0655	1464.72	1464.72	0.00123	0.84	TRUE
	3	LKHLVDEPQNLIK	2,HTL_AC_azide#0;	0.0993	1762.02	1761.99	0.02506	14.22	TRUE
	3	LKHLVDEPQNLIK	2,HTL_AC_azide#0;	0.127	1762	1761.99	0.00603	3.42	TRUE
	3	FKDLGEEHFK	2,HTL_AC_azide#0;	0.137	1464.72	1464.72	0.00513	3.5	TRUE
	3	FKDLGEEHFK	2,HTL_AC_azide#0;	0.143	1464.72	1464.72	0.00386	2.63	TRUE
	2	FKDLGEEHFK	2,HTL_AC_azide#0;	0.156	1464.72	1464.72	0.00417	2.84	TRUE
	3	FKDLGEEHFK	2,HTL_AC_azide#0;	0.184	1464.72	1464.72	0.00253	1.73	TRUE
	3	FKDLGEEHFK	2,HTL_AC_azide#0;	0.215	1464.73	1464.72	0.00598	4.08	TRUE
	3	FKDLGEEHFK	2,HTL_AC_azide#0;	0.236	1464.72	1464.72	0.00514	3.51	TRUE
	2	FKDLGEEHFK	2,HTL_AC_azide#0;	0.262	1464.72	1464.72	0.00039	0.27	TRUE
	3	FKDLGEEHFK	2,HTL_AC_azide#0;	0.28	1464.73	1464.72	0.00621	4.24	TRUE
	4	FKDLGEEHFK	2,HTL_AC_azide#0;	0.367	1464.72	1464.72	0.00324	2.21	TRUE
	3	FKDLGEEHFK	2,HTL_AC_azide#0;	0.374	1464.72	1464.72	0.00397	2.71	TRUE
	4	LKECCDKPLLEK	2,HTL_AC_azide#0;4,Carbamidomethyl[C]#0;5,Carbamidomethyl[C]#0;	0.000127	1747.88	1747.88	0.0039	2.23	TRUE
	4	LKECCDKPLLEK	2,HTL_AC_azide#0;4,Carbamidomethyl[C]#0;5,Carbamidomethyl[C]#0;	0.00092	1747.88	1747.88	0.00316	1.81	TRUE
	4	LKECCDKPLLEK	2,HTL_AC_azide#0;4,Carbamidomethyl[C]#0;5,Carbamidomethyl[C]#0;	0.00586	1747.88	1747.88	0.00322	1.84	TRUE
	3	LKECCDKPLLEK	2,HTL_AC_azide#0;4,Carbamidomethyl[C]#0;5,Carbamidomethyl[C]#0;	0.00815	1747.88	1747.88	0.00419	2.39	TRUE
	4	LKECCDKPLLEK	2,HTL_AC_azide#0;4,Carbamidomethyl[C]#0;5,Carbamidomethyl[C]#0;	0.0152	1747.88	1747.88	0.00424	2.43	TRUE
	3	LKECCDKPLLEK	2,HTL_AC_azide#0;4,Carbamidomethyl[C]#0;5,Carbamidomethyl[C]#0;	0.0305	1747.88	1747.88	0.00467	2.67	TRUE
	3	LKECCDKPLLEK	2,HTL_AC_azide#0;4,Carbamidomethyl[C]#0;5,Carbamidomethyl[C]#0;	0.0466	1747.88	1747.88	0.00482	2.76	TRUE
	4	LKECCDKPLLEK	2,HTL_AC_azide#0;4,Carbamidomethyl[C]#0;5,Carbamidomethyl[C]#0;	0.141	1747.88	1747.88	0.00151	0.86	TRUE
	4	LKPDPNTLCDEFKADEK	2,HTL_AC_azide#0;9,Carbamidomethyl[C]#0;	2.15e-06	2235.07	2235.07	0.00464	2.08	TRUE
	3	LKPDPNTLCDEFK	2,HTL_AC_azide#0;9,Carbamidomethyl[C]#0;	0.000272	1791.87	1791.87	0.0071	3.96	TRUE
	3	LKPDPNTLCDEFKADEK	2,HTL_AC_azide#0;9,Carbamidomethyl[C]#0;	0.000276	2235.07	2235.07	0.00386	1.73	TRUE
	3	LKPDPNTLCDEFKADEK	2,HTL_AC_azide#0;9,Carbamidomethyl[C]#0;	0.000324	2235.08	2235.07	0.00866	3.87	TRUE
	4	LKPDPNTLCDEFKADEK	2,HTL_AC_azide#0;9,Carbamidomethyl[C]#0;	0.000528	2235.07	2235.07	0.00395	1.77	TRUE
	3	LKPDPNTLCDEFKADEK	2,HTL_AC_azide#0;9,Carbamidomethyl[C]#0;	0.000888	2235.07	2235.07	0.00567	2.54	TRUE
	4	LKPDPNTLCDEFKADEK	2,HTL_AC_azide#0;9,Carbamidomethyl[C]#0;	0.0039	2235.08	2235.07	0.00886	3.96	TRUE
	3	LKPDPNTLCDEFKADEK	2,HTL_AC_azide#0;9,Carbamidomethyl[C]#0;	0.00617	2235.07	2235.07	0.00559	2.5	TRUE
	3	LKPDPNTLCDEFKADEK	2,HTL_AC_azide#0;9,Carbamidomethyl[C]#0;	0.00674	2235.08	2235.07	0.00835	3.73	TRUE
	2	LKPDPNTLCDEFK	2,HTL_AC_azide#0;9,Carbamidomethyl[C]#0;	0.00994	1791.87	1791.87	0.00856	4.78	TRUE
	4	LKPDPNTLCDEFKADEK	2,HTL_AC_azide#0;9,Carbamidomethyl[C]#0;	0.034	2235.08	2235.07	0.00965	4.32	TRUE
	3	LKPDPNTLCDEFKADEK	2,HTL_AC_azide#0;9,Carbamidomethyl[C]#0;	0.0365	2235.07	2235.07	0.00182	0.81	TRUE
	3	LKPDPNTLCDEFKADEK	2,HTL_AC_azide#0;9,Carbamidomethyl[C]#0;	0.0405	2235.07	2235.07	0.00788	3.52	TRUE
	2	LKPDPNTLCDEFK	2,HTL_AC_azide#0;9,Carbamidomethyl[C]#0;	0.0503	1791.88	1791.87	0.00958	5.34	TRUE
	4	LKPDPNTLCDEFKADEK	2,HTL_AC_azide#0;9,Carbamidomethyl[C]#0;	0.0855	2235.08	2235.07	0.01037	4.64	TRUE
	4	LKPDPNTLCDEFKADEK	2,HTL_AC_azide#0;9,Carbamidomethyl[C]#0;	0.156	2235.08	2235.07	0.00886	3.96	TRUE
	3	LKPDPNTLCDEFK	2,HTL_AC_azide#0;9,Carbamidomethyl[C]#0;	0.231	1791.87	1791.87	0.00747	4.17	TRUE
	3	DAIPENLPPLTADFAEDKDVCKNYQEAK	21,Carbamidomethyl[C]#0;22,HTL_AC_azide#0;	0.000616	3406.62	3406.62	-0.00224	-0.66	TRUE
	4	DAIPENLPPLTADFAEDKDVCKNYQEAK	21,Carbamidomethyl[C]#0;22,HTL_AC_azide#0;	0.000943	3406.63	3406.62	0.00878	2.58	TRUE
	2	GLVLIAFSQYLQQCPFDEHVK	21,HTL_AC_azide#0;	0.0117	2650.39	2650.34	0.04742	17.89	TRUE
	3	GLVLIAFSQYLQQCPFDEHVK	21,HTL_AC_azide#0;	0.29	2650.37	2650.34	0.03079	11.62	TRUE
	2	YICDNQDTISSKLK	3,Carbamidomethyl[C]#0;12,HTL_AC_azide#0;	0.000209	1899.93	1899.92	0.00691	3.64	TRUE
	3	YICDNQDTISSKLK	3,Carbamidomethyl[C]#0;12,HTL_AC_azide#0;	0.27	1899.92	1899.92	0.00214	1.13	TRUE
	3	RPCFSALTPDETYVPKAFDEK	3,Carbamidomethyl[C]#0;16,HTL_AC_azide#0;	0.00282	2686.3	2686.29	0.00914	3.4	TRUE
	3	RPCFSALTPDETYVPKAFDEK	3,Carbamidomethyl[C]#0;16,HTL_AC_azide#0;	0.00723	2686.3	2686.29	0.00833	3.1	TRUE
	4	RPCFSALTPDETYVPKAFDEK	3,Carbamidomethyl[C]#0;16,HTL_AC_azide#0;	0.00918	2686.3	2686.29	0.00807	3.01	TRUE
	3	RPCFSALTPDETYVPKAFDEK	3,Carbamidomethyl[C]#0;16,HTL_AC_azide#0;	0.00932	2686.3	2686.29	0.00649	2.41	TRUE
	4	SHCIAEVEKDAIPENLPPLTADFAEDKDVCK	3,Carbamidomethyl[C]#0;27,HTL_AC_azide#0;30,Carbamidomethyl[C]#0;	2.15e-07	3726.78	3726.77	0.01308	3.51	TRUE
	5	SHCIAEVEKDAIPENLPPLTADFAEDKDVCK	3,Carbamidomethyl[C]#0;27,HTL_AC_azide#0;30,Carbamidomethyl[C]#0;	0.00701	3726.78	3726.77	0.00552	1.48	TRUE
	2	GACLLPKIETMR	3,Carbamidomethyl[C]#0;7,HTL_AC_azide#0;	0.0168	1603.84	1603.84	0.00267	1.66	TRUE
	2	GACLLPKIETMR	3,Carbamidomethyl[C]#0;7,HTL_AC_azide#0;	0.0272	1603.84	1603.84	0.00254	1.58	TRUE
	3	GACLLPKIETMR	3,Carbamidomethyl[C]#0;7,HTL_AC_azide#0;	0.0473	1603.84	1603.84	0.00426	2.66	TRUE
	2	GACLLPKIETMR	3,Carbamidomethyl[C]#0;7,HTL_AC_azide#0;	0.0492	1603.84	1603.84	0.00025	0.15	TRUE
	3	GACLLPKIETMR	3,Carbamidomethyl[C]#0;7,HTL_AC_azide#0;	0.0933	1603.84	1603.84	0.00425	2.65	TRUE
	3	GACLLPKIETMR	3,Carbamidomethyl[C]#0;7,HTL_AC_azide#0;	0.118	1603.84	1603.84	0.00486	3.03	TRUE
	3	GACLLPKIETMR	3,Carbamidomethyl[C]#0;7,HTL_AC_azide#0;	0.152	1603.84	1603.84	0.00557	3.47	TRUE
	2	GACLLPKIETMR	3,Carbamidomethyl[C]#0;7,HTL_AC_azide#0;	0.331	1603.83	1603.84	-0.00241	-1.51	TRUE
	2	QNCDQFEKLGEYGFQNALIVR	3,Carbamidomethyl[C]#0;8,HTL_AC_azide#0;	6.85e-08	2744.33	2744.32	0.0123	4.48	TRUE
	2	QNCDQFEKLGEYGFQNALIVR	3,Carbamidomethyl[C]#0;8,HTL_AC_azide#0;	5.61e-07	2744.33	2744.32	0.01132	4.13	TRUE
	3	QNCDQFEKLGEYGFQNALIVR	3,Carbamidomethyl[C]#0;8,HTL_AC_azide#0;	2.53e-06	2744.32	2744.32	0.00376	1.37	TRUE
	3	QNCDQFEKLGEYGFQNALIVR	3,Carbamidomethyl[C]#0;8,HTL_AC_azide#0;	1.44e-05	2744.33	2744.32	0.00805	2.93	TRUE
	3	QNCDQFEKLGEYGFQNALIVR	3,Carbamidomethyl[C]#0;8,HTL_AC_azide#0;	0.00188	2744.32	2744.32	0.00229	0.84	TRUE
	4	QNCDQFEKLGEYGFQNALIVR	3,Carbamidomethyl[C]#0;8,HTL_AC_azide#0;	0.00952	2744.32	2744.32	0.0062	2.26	TRUE
	4	LRCASIQKFGER	3,Carbamidomethyl[C]#0;8,HTL_AC_azide#0;	0.0235	1679.87	1679.87	0.00089	0.53	TRUE
	3	QNCDQFEKLGEYGFQNALIVR	3,Carbamidomethyl[C]#0;8,HTL_AC_azide#0;	0.0414	2744.29	2744.32	-0.02786	-10.15	TRUE
	4	SHCIAEVEKDAIPENLPPLTADFAEDKDVCK	3,Carbamidomethyl[C]#0;9,HTL_AC_azide#0;30,Carbamidomethyl[C]#0;	1.14e-06	3726.78	3726.77	0.00812	2.18	TRUE
	5	SHCIAEVEKDAIPENLPPLTADFAEDKDVCK	3,Carbamidomethyl[C]#0;9,HTL_AC_azide#0;30,Carbamidomethyl[C]#0;	7.23e-05	3726.78	3726.77	0.00892	2.39	TRUE
	4	SHCIAEVEKDAIPENLPPLTADFAEDKDVCK	3,Carbamidomethyl[C]#0;9,HTL_AC_azide#0;30,Carbamidomethyl[C]#0;	0.000542	3726.77	3726.77	-0.00274	-0.73	TRUE
	5	SHCIAEVEKDAIPENLPPLTADFAEDKDVCK	3,Carbamidomethyl[C]#0;9,HTL_AC_azide#0;30,Carbamidomethyl[C]#0;	0.00186	3726.78	3726.77	0.00629	1.69	TRUE
	3	VTKCCTESLVNR	3,HTL_AC_azide#0;	0.00566	1567.76	1567.76	-0.00435	-2.77	TRUE
	3	VTKCCTESLVNR	3,HTL_AC_azide#0;	0.0614	1567.77	1567.76	0.00738	4.71	TRUE
	4	VTKCCTESLVNR	3,HTL_AC_azide#0;	0.121	1567.76	1567.76	-0.00476	-3.03	TRUE
	2	VTKCCTESLVNR	3,HTL_AC_azide#0;	0.153	1567.78	1567.76	0.01364	8.7	TRUE
	2	VTKCCTESLVNR	3,HTL_AC_azide#0;	0.214	1567.77	1567.76	0.01099	7.01	TRUE
	3	ALKAWSVAR	3,HTL_AC_azide#0;	0.0118	1216.69	1216.69	0.00276	2.27	TRUE
	2	ALKAWSVAR	3,HTL_AC_azide#0;	0.0194	1216.69	1216.69	0.00341	2.81	TRUE
	2	ALKAWSVAR	3,HTL_AC_azide#0;	0.0314	1216.69	1216.69	0.00392	3.22	TRUE
	2	ALKAWSVAR	3,HTL_AC_azide#0;	0.0325	1216.69	1216.69	0.00231	1.9	TRUE
	2	ALKAWSVAR	3,HTL_AC_azide#0;	0.034	1216.69	1216.69	0.00378	3.11	TRUE
	2	ALKAWSVAR	3,HTL_AC_azide#0;	0.0344	1216.69	1216.69	0.00136	1.12	TRUE
	3	THKSEIAHR	3,HTL_AC_azide#0;	0.0498	1293.67	1293.67	0.00114	0.88	TRUE
	2	ALKAWSVAR	3,HTL_AC_azide#0;	0.066	1216.69	1216.69	0.00387	3.18	TRUE
	2	ALKAWSVAR	3,HTL_AC_azide#0;	0.0825	1216.69	1216.69	0.00331	2.72	TRUE
	3	THKSEIAHR	3,HTL_AC_azide#0;	0.137	1293.67	1293.67	0.00104	0.8	TRUE
	3	THKSEIAHR	3,HTL_AC_azide#0;	0.137	1293.67	1293.67	-2e-05	-0.02	TRUE
	3	THKSEIAHR	3,HTL_AC_azide#0;	0.157	1293.67	1293.67	0.00101	0.78	TRUE
	3	THKSEIAHR	3,HTL_AC_azide#0;	0.239	1293.67	1293.67	-0.00161	-1.24	TRUE
	3	ALKAWSVAR	3,HTL_AC_azide#0;	0.284	1216.69	1216.69	0.00254	2.08	TRUE
	2	ALKAWSVAR	3,HTL_AC_azide#0;	0.293	1216.69	1216.69	0.00319	2.62	TRUE
	2	ALKAWSVAR	3,HTL_AC_azide#0;	0.296	1216.69	1216.69	4e-05	0.04	TRUE
	3	ALKAWSVAR	3,HTL_AC_azide#0;	0.305	1216.69	1216.69	0.00184	1.51	TRUE
	3	THKSEIAHR	3,HTL_AC_azide#0;	0.315	1293.67	1293.67	0.00086	0.66	TRUE
	2	ALKAWSVAR	3,HTL_AC_azide#0;	0.318	1216.69	1216.69	0.0015	1.23	TRUE
	3	ALKAWSVAR	3,HTL_AC_azide#0;	0.326	1216.69	1216.69	0.0024	1.98	TRUE
	3	ALKAWSVAR	3,HTL_AC_azide#0;	0.334	1216.69	1216.69	0.00216	1.78	TRUE
	2	ALKAWSVAR	3,HTL_AC_azide#0;	0.353	1216.69	1216.69	0.00282	2.32	TRUE
	2	ALKAWSVAR	3,HTL_AC_azide#0;	0.361	1216.69	1216.69	0.00287	2.36	TRUE
	2	ALKAWSVAR	3,HTL_AC_azide#0;	0.365	1216.69	1216.69	0.00243	2	TRUE
	3	ALKAWSVAR	3,HTL_AC_azide#0;	0.367	1216.69	1216.69	0.00426	3.5	TRUE
	2	ALKAWSVAR	3,HTL_AC_azide#0;	0.371	1216.69	1216.69	0.00167	1.37	TRUE
	3	THKSEIAHR	3,HTL_AC_azide#0;	0.38	1293.69	1293.67	0.01752	13.54	TRUE
	2	LAKEYEATLEECCAK	3,HTL_AC_azide#0;12,Carbamidomethyl[C]#0;13,Carbamidomethyl[C]#0;	4.06e-06	2029.93	2029.93	0.00435	2.14	TRUE
	3	LAKEYEATLEECCAK	3,HTL_AC_azide#0;12,Carbamidomethyl[C]#0;13,Carbamidomethyl[C]#0;	1.35e-05	2029.93	2029.93	0.00568	2.8	TRUE
	2	LAKEYEATLEECCAK	3,HTL_AC_azide#0;12,Carbamidomethyl[C]#0;13,Carbamidomethyl[C]#0;	6.16e-05	2029.93	2029.93	0.00105	0.52	TRUE
	2	LAKEYEATLEECCAK	3,HTL_AC_azide#0;12,Carbamidomethyl[C]#0;13,Carbamidomethyl[C]#0;	6.57e-05	2029.94	2029.93	0.00781	3.85	TRUE
	3	LAKEYEATLEECCAK	3,HTL_AC_azide#0;12,Carbamidomethyl[C]#0;13,Carbamidomethyl[C]#0;	0.000164	2029.9	2029.93	-0.02592	-12.77	TRUE
	3	LAKEYEATLEECCAK	3,HTL_AC_azide#0;12,Carbamidomethyl[C]#0;13,Carbamidomethyl[C]#0;	0.00255	2029.93	2029.93	0.0058	2.86	TRUE
	3	LAKEYEATLEECCAK	3,HTL_AC_azide#0;12,Carbamidomethyl[C]#0;13,Carbamidomethyl[C]#0;	0.00281	2029.93	2029.93	0.00205	1.01	TRUE
	3	LAKEYEATLEECCAK	3,HTL_AC_azide#0;12,Carbamidomethyl[C]#0;13,Carbamidomethyl[C]#0;	0.00438	2029.93	2029.93	-8e-05	-0.04	TRUE
	3	VHKECCHGDLLECADDRADLAK	3,HTL_AC_azide#0;13,Carbamidomethyl[C]#0;	0.00624	2713.27	2713.22	0.04711	17.36	TRUE
	4	VHKECCHGDLLECADDRADLAK	3,HTL_AC_azide#0;13,Carbamidomethyl[C]#0;	0.172	2713.26	2713.22	0.04048	14.92	TRUE
	4	VHKECCHGDLLECADDRADLAK	3,HTL_AC_azide#0;13,Carbamidomethyl[C]#0;	0.215	2713.26	2713.22	0.04038	14.88	TRUE
	2	VTKCCTESLVNR	3,HTL_AC_azide#0;4,Carbamidomethyl[C]#0;5,Carbamidomethyl[C]#0;	5.75e-05	1681.81	1681.81	0.00241	1.43	TRUE
	3	VTKCCTESLVNR	3,HTL_AC_azide#0;4,Carbamidomethyl[C]#0;5,Carbamidomethyl[C]#0;	0.000784	1681.81	1681.81	0.00244	1.45	TRUE
	3	VTKCCTESLVNR	3,HTL_AC_azide#0;4,Carbamidomethyl[C]#0;5,Carbamidomethyl[C]#0;	0.000788	1681.81	1681.81	0.00413	2.45	TRUE
	3	VTKCCTESLVNR	3,HTL_AC_azide#0;4,Carbamidomethyl[C]#0;5,Carbamidomethyl[C]#0;	0.00121	1681.81	1681.81	0.00307	1.82	TRUE
	3	VTKCCTESLVNR	3,HTL_AC_azide#0;4,Carbamidomethyl[C]#0;5,Carbamidomethyl[C]#0;	0.00141	1681.81	1681.81	0.00136	0.81	TRUE
	3	VTKCCTESLVNR	3,HTL_AC_azide#0;4,Carbamidomethyl[C]#0;5,Carbamidomethyl[C]#0;	0.00161	1681.81	1681.81	0.00487	2.9	TRUE
	3	VTKCCTESLVNR	3,HTL_AC_azide#0;4,Carbamidomethyl[C]#0;5,Carbamidomethyl[C]#0;	0.00196	1681.81	1681.81	0.00038	0.23	TRUE
	3	VTKCCTESLVNR	3,HTL_AC_azide#0;4,Carbamidomethyl[C]#0;5,Carbamidomethyl[C]#0;	0.00221	1681.81	1681.81	0.00206	1.23	TRUE
	3	VTKCCTESLVNR	3,HTL_AC_azide#0;4,Carbamidomethyl[C]#0;5,Carbamidomethyl[C]#0;	0.00226	1681.81	1681.81	0.00307	1.83	TRUE
	3	VTKCCTESLVNR	3,HTL_AC_azide#0;4,Carbamidomethyl[C]#0;5,Carbamidomethyl[C]#0;	0.00242	1681.81	1681.81	0.00512	3.04	TRUE
	3	VTKCCTESLVNR	3,HTL_AC_azide#0;4,Carbamidomethyl[C]#0;5,Carbamidomethyl[C]#0;	0.00244	1681.81	1681.81	0.00296	1.76	TRUE
	3	VTKCCTESLVNR	3,HTL_AC_azide#0;4,Carbamidomethyl[C]#0;5,Carbamidomethyl[C]#0;	0.00276	1681.81	1681.81	0.00089	0.53	TRUE
	3	VTKCCTESLVNR	3,HTL_AC_azide#0;4,Carbamidomethyl[C]#0;5,Carbamidomethyl[C]#0;	0.0033	1681.8	1681.81	-0.00286	-1.7	TRUE
	3	VTKCCTESLVNR	3,HTL_AC_azide#0;4,Carbamidomethyl[C]#0;5,Carbamidomethyl[C]#0;	0.00364	1681.81	1681.81	0.00336	2	TRUE
	3	VTKCCTESLVNR	3,HTL_AC_azide#0;4,Carbamidomethyl[C]#0;5,Carbamidomethyl[C]#0;	0.00366	1681.81	1681.81	0.00319	1.9	TRUE
	3	VTKCCTESLVNR	3,HTL_AC_azide#0;4,Carbamidomethyl[C]#0;5,Carbamidomethyl[C]#0;	0.00661	1681.81	1681.81	0.00303	1.8	TRUE
	2	VTKCCTESLVNR	3,HTL_AC_azide#0;4,Carbamidomethyl[C]#0;5,Carbamidomethyl[C]#0;	0.00905	1681.81	1681.81	0.00266	1.58	TRUE
	3	VTKCCTESLVNR	3,HTL_AC_azide#0;4,Carbamidomethyl[C]#0;5,Carbamidomethyl[C]#0;	0.0107	1681.82	1681.81	0.01464	8.7	TRUE
	2	VTKCCTESLVNR	3,HTL_AC_azide#0;4,Carbamidomethyl[C]#0;5,Carbamidomethyl[C]#0;	0.0493	1681.81	1681.81	0.00312	1.86	TRUE
	2	VTKCCTESLVNR	3,HTL_AC_azide#0;4,Carbamidomethyl[C]#0;5,Carbamidomethyl[C]#0;	0.0494	1681.81	1681.81	0.00289	1.72	TRUE
	3	VTKCCTESLVNR	3,HTL_AC_azide#0;4,Carbamidomethyl[C]#0;5,Carbamidomethyl[C]#0;	0.0667	1681.8	1681.81	-0.00584	-3.47	TRUE
	2	VTKCCTESLVNR	3,HTL_AC_azide#0;4,Carbamidomethyl[C]#0;5,Carbamidomethyl[C]#0;	0.164	1681.81	1681.81	-0.0015	-0.89	TRUE
	2	VTKCCTESLVNR	3,HTL_AC_azide#0;4,Carbamidomethyl[C]#0;5,Carbamidomethyl[C]#0;	0.237	1681.81	1681.81	0.00241	1.43	TRUE
	3	QIKKQTALVELLK	3,HTL_AC_azide#0;4,HTL_AC_azide#0;	0.0167	1942.15	1942.15	0.00608	3.13	TRUE
	3	QIKKQTALVELLK	3,HTL_AC_azide#0;4,HTL_AC_azide#0;	0.0486	1942.15	1942.15	0.00623	3.21	TRUE
	3	TVMENFVAFVDKCCAADDKEACFAVEGPK	3,Oxidation[M]#0;12,HTL_AC_azide#0;22,Carbamidomethyl[C]#0;	2.77e-06	3425.57	3425.52	0.0421	12.29	TRUE
	3	TVMENFVAFVDKCCAADDKEACFAVEGPK	3,Oxidation[M]#0;12,HTL_AC_azide#0;22,Carbamidomethyl[C]#0;	5.32e-06	3425.57	3425.52	0.04852	14.16	TRUE
	3	TVMENFVAFVDKCCAADDKEACFAVEGPK	3,Oxidation[M]#0;12,HTL_AC_azide#0;22,Carbamidomethyl[C]#0;	7.4e-06	3425.58	3425.52	0.05216	15.23	TRUE
	3	TVMENFVAFVDKCCAADDKEACFAVEGPK	3,Oxidation[M]#0;12,HTL_AC_azide#0;22,Carbamidomethyl[C]#0;	3.98e-05	3425.57	3425.52	0.04639	13.54	TRUE
	3	TVMENFVAFVDKCCAADDKEACFAVEGPK	3,Oxidation[M]#0;12,HTL_AC_azide#0;22,Carbamidomethyl[C]#0;	0.167	3425.58	3425.52	0.05747	16.78	TRUE
	4	LKECCDKPLLEK	4,Carbamidomethyl[C]#0;5,Carbamidomethyl[C]#0;7,HTL_AC_azide#0;	0.0374	1747.88	1747.88	0.00192	1.1	TRUE
	3	LKECCDKPLLEK	4,Carbamidomethyl[C]#0;5,Carbamidomethyl[C]#0;7,HTL_AC_azide#0;	0.0649	1747.88	1747.88	0.00393	2.25	TRUE
	2	LKECCDKPLLEK	4,Carbamidomethyl[C]#0;5,Carbamidomethyl[C]#0;7,HTL_AC_azide#0;	0.096	1747.88	1747.88	0.00116	0.67	TRUE
	2	LKECCDKPLLEK	4,Carbamidomethyl[C]#0;5,Carbamidomethyl[C]#0;7,HTL_AC_azide#0;	0.175	1747.88	1747.88	-0.00092	-0.53	TRUE
	4	LKECCDKPLLEK	4,Carbamidomethyl[C]#0;5,Carbamidomethyl[C]#0;7,HTL_AC_azide#0;	0.205	1747.88	1747.88	-0.0009	-0.51	TRUE
	4	DTHKSEIAHR	4,HTL_AC_azide#0;	0.000128	1408.7	1408.7	0.00325	2.3	TRUE
	3	DTHKSEIAHR	4,HTL_AC_azide#0;	0.000247	1408.7	1408.7	0.00295	2.09	TRUE
	4	DTHKSEIAHR	4,HTL_AC_azide#0;	0.00107	1408.7	1408.7	0.00181	1.28	TRUE
	3	DTHKSEIAHR	4,HTL_AC_azide#0;	0.00137	1408.7	1408.7	0.00184	1.3	TRUE
	4	DTHKSEIAHR	4,HTL_AC_azide#0;	0.00257	1408.7	1408.7	0.00258	1.83	TRUE
	3	DTHKSEIAHR	4,HTL_AC_azide#0;	0.00267	1408.7	1408.7	0.00112	0.79	TRUE
	4	DTHKSEIAHR	4,HTL_AC_azide#0;	0.00302	1408.7	1408.7	0.00301	2.13	TRUE
	4	DTHKSEIAHR	4,HTL_AC_azide#0;	0.00308	1408.7	1408.7	0.00338	2.4	TRUE
	2	FWGKYLYEIAR	4,HTL_AC_azide#0;	0.00318	1660.86	1660.86	0.00287	1.73	TRUE
	3	FWGKYLYEIAR	4,HTL_AC_azide#0;	0.00409	1660.86	1660.86	0.0039	2.35	TRUE
	3	FWGKYLYEIAR	4,HTL_AC_azide#0;	0.00487	1660.86	1660.86	0.00344	2.07	TRUE
	4	DTHKSEIAHR	4,HTL_AC_azide#0;	0.00493	1408.7	1408.7	0.00147	1.04	TRUE
	4	DTHKSEIAHR	4,HTL_AC_azide#0;	0.00494	1408.7	1408.7	-0.00107	-0.76	TRUE
	4	DTHKSEIAHR	4,HTL_AC_azide#0;	0.00607	1408.7	1408.7	0.00335	2.38	TRUE
	3	FWGKYLYEIAR	4,HTL_AC_azide#0;	0.00656	1660.86	1660.86	0.00385	2.32	TRUE
	4	DTHKSEIAHR	4,HTL_AC_azide#0;	0.00846	1408.7	1408.7	0.00038	0.27	TRUE
	3	FWGKYLYEIAR	4,HTL_AC_azide#0;	0.00884	1660.86	1660.86	0.00572	3.44	TRUE
	4	DTHKSEIAHR	4,HTL_AC_azide#0;	0.0091	1408.7	1408.7	0.00452	3.21	TRUE
	3	FWGKYLYEIAR	4,HTL_AC_azide#0;	0.00958	1660.86	1660.86	0.00517	3.11	TRUE
	4	DTHKSEIAHR	4,HTL_AC_azide#0;	0.0104	1408.7	1408.7	0.00203	1.44	TRUE
	2	FWGKYLYEIAR	4,HTL_AC_azide#0;	0.0108	1660.86	1660.86	0.00567	3.42	TRUE
	4	DTHKSEIAHR	4,HTL_AC_azide#0;	0.0125	1408.7	1408.7	0.00376	2.67	TRUE
	4	DTHKSEIAHR	4,HTL_AC_azide#0;	0.0137	1408.7	1408.7	0.00239	1.7	TRUE
	4	DTHKSEIAHR	4,HTL_AC_azide#0;	0.0139	1408.7	1408.7	0.0019	1.35	TRUE
	3	DTHKSEIAHR	4,HTL_AC_azide#0;	0.0161	1408.7	1408.7	0.00275	1.95	TRUE
	4	DTHKSEIAHR	4,HTL_AC_azide#0;	0.0165	1408.7	1408.7	0.00159	1.13	TRUE
	3	DTHKSEIAHR	4,HTL_AC_azide#0;	0.0169	1408.7	1408.7	0.00152	1.08	TRUE
	3	DTHKSEIAHR	4,HTL_AC_azide#0;	0.0172	1408.7	1408.7	0.00422	2.99	TRUE
	4	DTHKSEIAHR	4,HTL_AC_azide#0;	0.0173	1408.7	1408.7	0.00186	1.32	TRUE
	3	DTHKSEIAHR	4,HTL_AC_azide#0;	0.0185	1408.7	1408.7	0.00047	0.33	TRUE
	3	FWGKYLYEIAR	4,HTL_AC_azide#0;	0.0187	1660.86	1660.86	0.00696	4.19	TRUE
	3	FWGKYLYEIAR	4,HTL_AC_azide#0;	0.0194	1660.86	1660.86	0.00521	3.14	TRUE
	3	DTHKSEIAHR	4,HTL_AC_azide#0;	0.0199	1408.7	1408.7	0.00253	1.8	TRUE
	3	DTHKSEIAHR	4,HTL_AC_azide#0;	0.0201	1408.7	1408.7	0.00474	3.37	TRUE
	3	DTHKSEIAHR	4,HTL_AC_azide#0;	0.021	1408.7	1408.7	0.00211	1.5	TRUE
	4	DTHKSEIAHR	4,HTL_AC_azide#0;	0.0215	1408.7	1408.7	0.00201	1.43	TRUE
	3	DTHKSEIAHR	4,HTL_AC_azide#0;	0.022	1408.7	1408.7	0.00238	1.69	TRUE
	4	DTHKSEIAHR	4,HTL_AC_azide#0;	0.0221	1408.7	1408.7	-8e-05	-0.06	TRUE
	4	DTHKSEIAHR	4,HTL_AC_azide#0;	0.0225	1408.7	1408.7	-0.00105	-0.75	TRUE
	3	DTHKSEIAHR	4,HTL_AC_azide#0;	0.0228	1408.7	1408.7	0.00243	1.72	TRUE
	4	DTHKSEIAHR	4,HTL_AC_azide#0;	0.0252	1408.7	1408.7	0.00215	1.53	TRUE
	4	DTHKSEIAHR	4,HTL_AC_azide#0;	0.0259	1408.7	1408.7	0.0004	0.29	TRUE
	4	DTHKSEIAHR	4,HTL_AC_azide#0;	0.0263	1408.7	1408.7	-0.00025	-0.18	TRUE
	3	FWGKYLYEIAR	4,HTL_AC_azide#0;	0.0283	1660.86	1660.86	0.00476	2.87	TRUE
	3	DTHKSEIAHR	4,HTL_AC_azide#0;	0.0305	1408.7	1408.7	0.0034	2.41	TRUE
	3	DTHKSEIAHR	4,HTL_AC_azide#0;	0.0314	1408.7	1408.7	0.00352	2.5	TRUE
	3	DTHKSEIAHR	4,HTL_AC_azide#0;	0.0326	1408.7	1408.7	-1e-05	0	TRUE
	3	DTHKSEIAHR	4,HTL_AC_azide#0;	0.0356	1408.7	1408.7	0.0034	2.41	TRUE
	3	DTHKSEIAHR	4,HTL_AC_azide#0;	0.0361	1408.7	1408.7	0.00181	1.28	TRUE
	4	DTHKSEIAHR	4,HTL_AC_azide#0;	0.0366	1408.7	1408.7	0.00123	0.88	TRUE
	3	DTHKSEIAHR	4,HTL_AC_azide#0;	0.0369	1408.7	1408.7	0.00083	0.59	TRUE
	3	DTHKSEIAHR	4,HTL_AC_azide#0;	0.0386	1408.7	1408.7	0.0019	1.35	TRUE
	3	DTHKSEIAHR	4,HTL_AC_azide#0;	0.0392	1408.7	1408.7	0.00378	2.68	TRUE
	4	DTHKSEIAHR	4,HTL_AC_azide#0;	0.0465	1408.7	1408.7	0.00053	0.37	TRUE
	2	DTHKSEIAHR	4,HTL_AC_azide#0;	0.0547	1408.7	1408.7	0.00067	0.47	TRUE
	2	FWGKYLYEIAR	4,HTL_AC_azide#0;	0.0558	1660.86	1660.86	0.00266	1.6	TRUE
	2	SLGKVGTR	4,HTL_AC_azide#0;	0.062	1032.59	1032.59	0.00245	2.37	TRUE
	3	DTHKSEIAHR	4,HTL_AC_azide#0;	0.064	1408.7	1408.7	0.00461	3.27	TRUE
	3	DTHKSEIAHR	4,HTL_AC_azide#0;	0.0668	1408.7	1408.7	0.00322	2.29	TRUE
	3	DTHKSEIAHR	4,HTL_AC_azide#0;	0.07	1408.7	1408.7	0.00221	1.57	TRUE
	4	DTHKSEIAHR	4,HTL_AC_azide#0;	0.0803	1408.7	1408.7	0.00032	0.22	TRUE
	3	DTHKSEIAHR	4,HTL_AC_azide#0;	0.0989	1408.7	1408.7	0.00406	2.88	TRUE
	4	DTHKSEIAHR	4,HTL_AC_azide#0;	0.105	1408.7	1408.7	-0.00036	-0.26	TRUE
	4	DTHKSEIAHR	4,HTL_AC_azide#0;	0.114	1408.7	1408.7	0.001	0.71	TRUE
	2	DTHKSEIAHR	4,HTL_AC_azide#0;	0.131	1408.7	1408.7	0.00101	0.71	TRUE
	3	DTHKSEIAHR	4,HTL_AC_azide#0;	0.136	1408.71	1408.7	0.00637	4.52	TRUE
	4	HKPKATEEQLK	4,HTL_AC_azide#0;	0.174	1523.83	1523.82	0.00367	2.41	TRUE
	4	DTHKSEIAHR	4,HTL_AC_azide#0;	0.197	1408.7	1408.7	0.00283	2.01	TRUE
	2	SLGKVGTR	4,HTL_AC_azide#0;	0.225	1032.59	1032.59	0.00076	0.73	TRUE
	2	SLGKVGTR	4,HTL_AC_azide#0;	0.234	1032.59	1032.59	0.00212	2.05	TRUE
	2	LSQKFPK	4,HTL_AC_azide#0;	0.244	1062.6	1062.6	0.00278	2.62	TRUE
	2	SLGKVGTR	4,HTL_AC_azide#0;	0.248	1032.59	1032.59	0.00199	1.92	TRUE
	3	HKPKATEEQLK	4,HTL_AC_azide#0;	0.254	1523.83	1523.82	0.00434	2.85	TRUE
	2	SLGKVGTR	4,HTL_AC_azide#0;	0.259	1032.59	1032.59	0.00271	2.63	TRUE
	3	ADEKKFWGK	4,HTL_AC_azide#0;	0.268	1323.68	1323.68	0.00137	1.03	TRUE
	2	CCTKPESER	4,HTL_AC_azide#0;	0.298	1267.55	1267.55	0.00248	1.96	TRUE
	3	LSQKFPK	4,HTL_AC_azide#0;	0.318	1062.6	1062.6	0.00142	1.34	TRUE
	4	DTHKSEIAHR	4,HTL_AC_azide#0;	0.32	1408.7	1408.7	0.00152	1.08	TRUE
	3	LSQKFPK	4,HTL_AC_azide#0;	0.342	1062.6	1062.6	0.00213	2.01	TRUE
	2	SLGKVGTR	4,HTL_AC_azide#0;	0.344	1032.59	1032.59	0.00293	2.84	TRUE
	4	DTHKSEIAHR	4,HTL_AC_azide#0;	0.346	1408.7	1408.7	0.00275	1.95	TRUE
	3	LSQKFPK	4,HTL_AC_azide#0;	0.354	1062.6	1062.6	0.00141	1.33	TRUE
	3	LSQKFPK	4,HTL_AC_azide#0;	0.358	1062.61	1062.6	0.00383	3.61	TRUE
	4	DTHKSEIAHR	4,HTL_AC_azide#0;	0.362	1408.7	1408.7	0.00264	1.87	TRUE
	2	SLGKVGTR	4,HTL_AC_azide#0;	0.394	1032.59	1032.59	0.00334	3.23	TRUE
	2	KFWGKYLYEIAR	5,HTL_AC_azide#0;	2.65e-05	1788.95	1788.95	0.00375	2.1	TRUE
	2	KFWGKYLYEIAR	5,HTL_AC_azide#0;	2.69e-05	1788.96	1788.95	0.00586	3.28	TRUE
	2	KFWGKYLYEIAR	5,HTL_AC_azide#0;	0.00134	1788.96	1788.95	0.00469	2.62	TRUE
	3	KFWGKYLYEIAR	5,HTL_AC_azide#0;	0.00213	1788.95	1788.95	0.00197	1.1	TRUE
	3	KFWGKYLYEIAR	5,HTL_AC_azide#0;	0.0052	1788.95	1788.95	0.0041	2.29	TRUE
	4	KFWGKYLYEIAR	5,HTL_AC_azide#0;	0.00535	1788.96	1788.95	0.00618	3.45	TRUE
	3	KFWGKYLYEIAR	5,HTL_AC_azide#0;	0.00569	1788.95	1788.95	0.00213	1.19	TRUE
	3	KFWGKYLYEIAR	5,HTL_AC_azide#0;	0.00886	1788.95	1788.95	0.00399	2.23	TRUE
	4	KFWGKYLYEIAR	5,HTL_AC_azide#0;	0.00893	1788.96	1788.95	0.00472	2.64	TRUE
	3	KFWGKYLYEIAR	5,HTL_AC_azide#0;	0.0161	1788.95	1788.95	0.00039	0.22	TRUE
	4	KFWGKYLYEIAR	5,HTL_AC_azide#0;	0.0333	1788.95	1788.95	0.0044	2.46	TRUE
	4	RDTHKSEIAHR	5,HTL_AC_azide#0;	0.0712	1564.82	1564.8	0.01553	9.93	TRUE
	3	KFWGKYLYEIAR	5,HTL_AC_azide#0;	0.0769	1788.95	1788.95	-0.00113	-0.63	TRUE
	4	KFWGKYLYEIAR	5,HTL_AC_azide#0;	0.104	1788.96	1788.95	0.0049	2.74	TRUE
	2	KFWGKYLYEIAR	5,HTL_AC_azide#0;	0.116	1788.95	1788.95	0.00288	1.61	TRUE
	3	KFWGKYLYEIAR	5,HTL_AC_azide#0;	0.144	1788.94	1788.95	-0.01499	-8.38	TRUE
	4	RDTHKSEIAHR	5,HTL_AC_azide#0;	0.299	1564.82	1564.8	0.01622	10.37	TRUE
	3	AFDEKLFTFHADICTLPDTEK	5,HTL_AC_azide#0;14,Carbamidomethyl[C]#0;	4.03e-07	2713.29	2713.29	0.00149	0.55	TRUE
	3	AFDEKLFTFHADICTLPDTEK	5,HTL_AC_azide#0;14,Carbamidomethyl[C]#0;	6.72e-05	2713.29	2713.29	0.00521	1.92	TRUE
	4	AFDEKLFTFHADICTLPDTEK	5,HTL_AC_azide#0;14,Carbamidomethyl[C]#0;	0.000103	2713.3	2713.29	0.00679	2.5	TRUE
	4	AFDEKLFTFHADICTLPDTEK	5,HTL_AC_azide#0;14,Carbamidomethyl[C]#0;	0.000307	2713.29	2713.29	-0.00268	-0.99	TRUE
	3	AFDEKLFTFHADICTLPDTEK	5,HTL_AC_azide#0;14,Carbamidomethyl[C]#0;	0.153	2713.28	2713.29	-0.00548	-2.02	TRUE
	3	ADLAKYICDNQDTISSK	5,HTL_AC_azide#0;8,Carbamidomethyl[C]#0;	5.16e-05	2157.03	2157.02	0.00666	3.09	TRUE
	2	ADLAKYICDNQDTISSK	5,HTL_AC_azide#0;8,Carbamidomethyl[C]#0;	0.00787	2157.03	2157.02	0.01271	5.89	TRUE
	2	DDPHACYSTVFDKLK	6,Carbamidomethyl[C]#0;13,HTL_AC_azide#0;	8.37e-05	2010.94	2010.93	0.01115	5.55	TRUE
	2	DDPHACYSTVFDKLK	6,Carbamidomethyl[C]#0;13,HTL_AC_azide#0;	0.000442	2010.93	2010.93	0.00458	2.28	TRUE
	3	DDPHACYSTVFDKLK	6,Carbamidomethyl[C]#0;13,HTL_AC_azide#0;	0.00108	2010.93	2010.93	0.00106	0.53	TRUE
	2	DDPHACYSTVFDKLK	6,Carbamidomethyl[C]#0;13,HTL_AC_azide#0;	0.011	2010.94	2010.93	0.01042	5.18	TRUE
	4	DDPHACYSTVFDKLK	6,Carbamidomethyl[C]#0;13,HTL_AC_azide#0;	0.0267	2010.93	2010.93	0.00289	1.44	TRUE
	3	DDPHACYSTVFDKLK	6,Carbamidomethyl[C]#0;13,HTL_AC_azide#0;	0.032	2010.93	2010.93	0.00268	1.33	TRUE
	3	DDPHACYSTVFDKLK	6,Carbamidomethyl[C]#0;13,HTL_AC_azide#0;	0.0407	2010.94	2010.93	0.00588	2.92	TRUE
	4	DDPHACYSTVFDKLK	6,Carbamidomethyl[C]#0;13,HTL_AC_azide#0;	0.0498	2010.93	2010.93	-0.00029	-0.14	TRUE
	3	DDPHACYSTVFDKLK	6,Carbamidomethyl[C]#0;13,HTL_AC_azide#0;	0.0687	2010.94	2010.93	0.00625	3.11	TRUE
	4	DDPHACYSTVFDKLK	6,Carbamidomethyl[C]#0;13,HTL_AC_azide#0;	0.106	2010.93	2010.93	0.00283	1.41	TRUE
	2	DDPHACYSTVFDKLK	6,Carbamidomethyl[C]#0;13,HTL_AC_azide#0;	0.203	2010.94	2010.93	0.01247	6.2	TRUE
	3	DDPHACYSTVFDKLKHLVDEPQNLIK	6,Carbamidomethyl[C]#0;15,HTL_AC_azide#0;	0.00111	3297.64	3297.63	0.00933	2.83	TRUE
	2	NYQEAKDAFLGSFLYEYSR	6,HTL_AC_azide#0;	2.52e-08	2516.18	2516.18	0.00353	1.4	TRUE
	3	NYQEAKDAFLGSFLYEYSR	6,HTL_AC_azide#0;	5.95e-07	2516.18	2516.18	0.00398	1.58	TRUE
	3	NYQEAKDAFLGSFLYEYSR	6,HTL_AC_azide#0;	0.000588	2516.18	2516.18	0.00064	0.26	TRUE
	2	TPVSEKVTK	6,HTL_AC_azide#0;	0.022	1203.67	1203.67	0.00096	0.79	TRUE
	2	TPVSEKVTK	6,HTL_AC_azide#0;	0.0922	1203.67	1203.67	0.00219	1.82	TRUE
	3	ATEEQLKTVMENFVAFVDK	7,HTL_AC_azide#0;	0.00358	2414.19	2414.2	-0.00925	-3.83	TRUE
	4	LSQKFPKAEFVEVTK	7,HTL_AC_azide#0;	0.0102	1966.08	1966.07	0.00348	1.77	TRUE
	3	ATEEQLKTVMENFVAFVDK	7,HTL_AC_azide#0;	0.0145	2414.19	2414.2	-0.00888	-3.68	TRUE
	2	CCAADDKEACFAVEGPK	7,HTL_AC_azide#0;	0.32	1971.81	1971.83	-0.02444	-12.39	TRUE
	4	LSQKFPKAEFVEVTK	7,HTL_AC_azide#0;	0.36	1966.08	1966.07	0.00428	2.18	TRUE
	3	CCAADDKEACFAVEGPK	7,HTL_AC_azide#0;10,Carbamidomethyl[C]#0;	0.00206	2028.89	2028.85	0.03747	18.47	TRUE
	3	CCAADDKEACFAVEGPK	7,HTL_AC_azide#0;10,Carbamidomethyl[C]#0;	0.00917	2028.89	2028.85	0.03873	19.09	TRUE
	3	ATEEQLKTVMENFVAFVDK	7,HTL_AC_azide#0;10,Oxidation[M]#0;	0.000352	2430.2	2430.19	0.00323	1.33	TRUE
	2	YNGVFQECCQAEDKGACLLPK	8,Carbamidomethyl[C]#0;14,HTL_AC_azide#0;	0.0701	2588.21	2588.17	0.04772	18.44	TRUE
	2	AEFVEVTKLVTDLTK	8,HTL_AC_azide#0;	3.92e-06	1908.04	1908.04	0.00515	2.7	TRUE
	3	AEFVEVTKLVTDLTK	8,HTL_AC_azide#0;	3.25e-05	1908.05	1908.04	0.00617	3.23	TRUE
	3	QNCDQFEKLGEYGFQNALIVR	8,HTL_AC_azide#0;	0.000358	2687.24	2687.3	-0.05072	-18.87	TRUE
	4	SEIAHRFKDLGEEHFK	8,HTL_AC_azide#0;	0.348	2158.08	2158.07	0.00681	3.15	TRUE
	2	LFTFHADICTLPDTEKQIK	9,Carbamidomethyl[C]#0;16,HTL_AC_azide#0;	1.78e-05	2492.27	2492.26	0.00891	3.58	TRUE
	4	LFTFHADICTLPDTEKQIKK	9,Carbamidomethyl[C]#0;16,HTL_AC_azide#0;	0.00133	2620.35	2620.35	0.00341	1.3	TRUE
	3	LFTFHADICTLPDTEKQIKK	9,Carbamidomethyl[C]#0;16,HTL_AC_azide#0;	0.00172	2620.36	2620.35	0.01037	3.96	TRUE
	3	LFTFHADICTLPDTEKQIKK	9,Carbamidomethyl[C]#0;16,HTL_AC_azide#0;	0.00375	2620.35	2620.35	0.00307	1.17	TRUE
	3	LFTFHADICTLPDTEKQIK	9,Carbamidomethyl[C]#0;16,HTL_AC_azide#0;	0.00477	2492.26	2492.26	0.00857	3.44	TRUE
	4	LFTFHADICTLPDTEKQIK	9,Carbamidomethyl[C]#0;16,HTL_AC_azide#0;	0.00643	2492.26	2492.26	0.00559	2.24	TRUE
	3	LFTFHADICTLPDTEKQIK	9,Carbamidomethyl[C]#0;16,HTL_AC_azide#0;	0.0115	2492.26	2492.26	0.00398	1.6	TRUE
	5	LFTFHADICTLPDTEKQIKK	9,Carbamidomethyl[C]#0;16,HTL_AC_azide#0;	0.113	2620.36	2620.35	0.01139	4.35	TRUE
	4	LFTFHADICTLPDTEKQIK	9,Carbamidomethyl[C]#0;16,HTL_AC_azide#0;	0.157	2492.26	2492.26	0.00427	1.71	TRUE
	5	LFTFHADICTLPDTEKQIKK	9,Carbamidomethyl[C]#0;16,HTL_AC_azide#0;	0.275	2620.36	2620.35	0.00633	2.41	TRUE
	2	LFTFHADICTLPDTEKQIKK	9,Carbamidomethyl[C]#0;19,HTL_AC_azide#0;	0.000185	2620.36	2620.35	0.0071	2.71	TRUE
	4	TPVSEKVTKCCTESLVNR	9,HTL_AC_azide#0;10,Carbamidomethyl[C]#0;11,Carbamidomethyl[C]#0;	0.000285	2323.15	2323.15	0.00314	1.35	TRUE
	3	TPVSEKVTKCCTESLVNR	9,HTL_AC_azide#0;10,Carbamidomethyl[C]#0;11,Carbamidomethyl[C]#0;	0.000693	2323.15	2323.15	0.00116	0.5	TRUE
	4	SHCIAEVEKDAIPENLPPLTADFAEDKDVCK	9,HTL_AC_azide#0;30,Carbamidomethyl[C]#0;	0.383	3669.78	3669.75	0.0336	9.16	TRUE
sp|P02769|ALBU_BOVIN

## Sheet: R2
Protein AC	Charge	Sq	Mod_Sites	Score	Spectra Mass	Theory Sq Mass	Delta Mass	Delta Mass (PPM)	Target_Decoy
sp|P02769|ALBU_BOVIN	2	KQTALVELLK	0,Acetyl[AnyN-term]#0;1,HTL_AC_azide#0;	0.000635	1399.82	1399.82	0.0018	1.28	TRUE
	3	KFWGKYLYEIAR	0,Acetyl[AnyN-term]#0;1,HTL_AC_azide#0;	0.000785	1830.95	1830.96	-0.01044	-5.7	TRUE
	3	KQTALVELLK	0,Acetyl[AnyN-term]#0;1,HTL_AC_azide#0;	0.00273	1399.81	1399.82	-0.01356	-9.69	TRUE
	3	KQTALVELLK	0,Acetyl[AnyN-term]#0;1,HTL_AC_azide#0;	0.00453	1399.82	1399.82	-0.00493	-3.52	TRUE
	3	KQTALVELLK	0,Acetyl[AnyN-term]#0;1,HTL_AC_azide#0;	0.00995	1399.8	1399.82	-0.02022	-14.44	TRUE
	2	KQTALVELLK	0,Acetyl[AnyN-term]#0;1,HTL_AC_azide#0;	0.0122	1399.81	1399.82	-0.01135	-8.11	TRUE
	3	KQTALVELLK	0,Acetyl[AnyN-term]#0;1,HTL_AC_azide#0;	0.16	1399.82	1399.82	-0.00278	-1.99	TRUE
	3	KFWGKYLYEIAR	0,Acetyl[AnyN-term]#0;1,HTL_AC_azide#0;	0.331	1830.96	1830.96	0.00301	1.64	TRUE
	4	KFWGKYLYEIAR	0,Acetyl[AnyN-term]#0;1,HTL_AC_azide#0;5,HTL_AC_azide#0;	0.242	2046.04	2046.06	-0.02091	-10.22	TRUE
	3	SLHTLFGDELCKVASLR	0,Acetyl[AnyN-term]#0;11,Carbamidomethyl[C]#0;12,HTL_AC_azide#0;	0.345	2203.13	2203.12	0.00838	3.8	TRUE
	3	HLVDEPQNLIKQNCDQFEK	0,Acetyl[AnyN-term]#0;11,HTL_AC_azide#0;14,Carbamidomethyl[C]#0;	0.103	2612.24	2612.25	-0.01278	-4.89	TRUE
	4	EYEATLEECCAKDDPHACYSTVFDK	0,Acetyl[AnyN-term]#0;12,HTL_AC_azide#0;18,Carbamidomethyl[C]#0;	0.00571	3181.28	3181.31	-0.03702	-11.64	TRUE
	3	TVMENFVAFVDKCCAADDKEACFAVEGPK	0,Acetyl[AnyN-term]#0;12,HTL_AC_azide#0;22,Carbamidomethyl[C]#0;	0.000195	3451.57	3451.54	0.03643	10.56	TRUE
	4	TVMENFVAFVDKCCAADDKEACFAVEGPK	0,Acetyl[AnyN-term]#0;12,HTL_AC_azide#0;22,Carbamidomethyl[C]#0;	0.00163	3451.5	3451.54	-0.03472	-10.06	TRUE
	3	TVMENFVAFVDKCCAADDKEACFAVEGPK	0,Acetyl[AnyN-term]#0;12,HTL_AC_azide#0;22,Carbamidomethyl[C]#0;	0.0598	3451.51	3451.54	-0.03236	-9.37	TRUE
	4	TCVADESHAGCEKSLHTLFGDELCK	0,Acetyl[AnyN-term]#0;13,HTL_AC_azide#0;24,Carbamidomethyl[C]#0;	0.0191	3007.29	3007.33	-0.03539	-11.77	TRUE
	5	LAKEYEATLEECCAKDDPHACYSTVFDK	0,Acetyl[AnyN-term]#0;15,HTL_AC_azide#0;21,Carbamidomethyl[C]#0;	0.208	3493.5	3493.53	-0.03289	-9.41	TRUE
	4	HPYFYAPELLYYANKYNGVFQECCQAEDKGACLLPK	0,Acetyl[AnyN-term]#0;15,HTL_AC_azide#0;32,Carbamidomethyl[C]#0;	0.295	4500.05	4500.08	-0.03243	-7.21	TRUE
	4	RHPYFYAPELLYYANKYNGVFQECCQAEDK	0,Acetyl[AnyN-term]#0;16,HTL_AC_azide#0;25,Carbamidomethyl[C]#0;	0.233	3973.81	3973.8	0.01069	2.69	TRUE
	3	CCTKPESERMPCTEDYLSLILNR	0,Acetyl[AnyN-term]#0;2,Carbamidomethyl[C]#0;4,HTL_AC_azide#0;	0.291	3015.42	3015.38	0.04598	15.25	TRUE
	3	LKECCDKPLLEK	0,Acetyl[AnyN-term]#0;2,HTL_AC_azide#0;4,Carbamidomethyl[C]#0;	0.0171	1732.85	1732.87	-0.01982	-11.44	TRUE
	3	LKECCDKPLLEK	0,Acetyl[AnyN-term]#0;2,HTL_AC_azide#0;4,Carbamidomethyl[C]#0;	0.0177	1732.85	1732.87	-0.01941	-11.2	TRUE
	3	LKECCDKPLLEK	0,Acetyl[AnyN-term]#0;2,HTL_AC_azide#0;4,Carbamidomethyl[C]#0;	0.0449	1732.85	1732.87	-0.01384	-7.99	TRUE
	3	LKECCDKPLLEK	0,Acetyl[AnyN-term]#0;2,HTL_AC_azide#0;4,Carbamidomethyl[C]#0;	0.0453	1732.85	1732.87	-0.01826	-10.54	TRUE
	3	LKECCDKPLLEK	0,Acetyl[AnyN-term]#0;2,HTL_AC_azide#0;4,Carbamidomethyl[C]#0;	0.211	1732.86	1732.87	-0.01206	-6.96	TRUE
	3	LKECCDKPLLEK	0,Acetyl[AnyN-term]#0;2,HTL_AC_azide#0;4,Carbamidomethyl[C]#0;	0.259	1732.85	1732.87	-0.01821	-10.51	TRUE
	3	LKECCDKPLLEK	0,Acetyl[AnyN-term]#0;2,HTL_AC_azide#0;4,Carbamidomethyl[C]#0;	0.314	1732.85	1732.87	-0.01514	-8.74	TRUE
	3	LKECCDKPLLEK	0,Acetyl[AnyN-term]#0;2,HTL_AC_azide#0;4,Carbamidomethyl[C]#0;	0.359	1732.85	1732.87	-0.014	-8.08	TRUE
	3	LKECCDKPLLEK	0,Acetyl[AnyN-term]#0;2,HTL_AC_azide#0;4,Carbamidomethyl[C]#0;	0.382	1732.85	1732.87	-0.01847	-10.66	TRUE
	3	LKPDPNTLCDEFKADEK	0,Acetyl[AnyN-term]#0;2,HTL_AC_azide#0;9,Carbamidomethyl[C]#0;	0.034	2277.08	2277.08	0.00542	2.38	TRUE
	3	QNCDQFEKLGEYGFQNALIVR	0,Acetyl[AnyN-term]#0;3,Carbamidomethyl[C]#0;8,HTL_AC_azide#0;	3.75e-05	2786.28	2786.33	-0.04948	-17.76	TRUE
	3	QIKKQTALVELLK	0,Acetyl[AnyN-term]#0;3,HTL_AC_azide#0;	0.00341	1769.06	1769.06	0.00318	1.79	TRUE
	3	VHKECCHGDLLECADDRADLAK	0,Acetyl[AnyN-term]#0;3,HTL_AC_azide#0;13,Carbamidomethyl[C]#0;	4e-05	2755.19	2755.23	-0.03828	-13.89	TRUE
	4	VHKECCHGDLLECADDRADLAK	0,Acetyl[AnyN-term]#0;3,HTL_AC_azide#0;13,Carbamidomethyl[C]#0;	0.0022	2755.27	2755.23	0.03567	12.94	TRUE
	3	VHKECCHGDLLECADDR	0,Acetyl[AnyN-term]#0;3,HTL_AC_azide#0;13,Carbamidomethyl[C]#0;	0.0241	2256.99	2256.95	0.04215	18.67	TRUE
	3	VHKECCHGDLLECADDR	0,Acetyl[AnyN-term]#0;3,HTL_AC_azide#0;13,Carbamidomethyl[C]#0;	0.0541	2256.91	2256.95	-0.03845	-17.03	TRUE
	4	VHKECCHGDLLECADDRADLAK	0,Acetyl[AnyN-term]#0;3,HTL_AC_azide#0;13,Carbamidomethyl[C]#0;	0.0634	2755.27	2755.23	0.04065	14.75	TRUE
	3	VHKECCHGDLLECADDR	0,Acetyl[AnyN-term]#0;3,HTL_AC_azide#0;13,Carbamidomethyl[C]#0;	0.0754	2256.99	2256.95	0.04259	18.87	TRUE
	4	VHKECCHGDLLECADDRADLAK	0,Acetyl[AnyN-term]#0;3,HTL_AC_azide#0;13,Carbamidomethyl[C]#0;	0.222	2755.19	2755.23	-0.04038	-14.66	TRUE
	4	LAKEYEATLEECCAKDDPHACYSTVFDK	0,Acetyl[AnyN-term]#0;3,HTL_AC_azide#0;21,Carbamidomethyl[C]#0;	0.172	3493.5	3493.53	-0.03473	-9.94	TRUE
	3	QIKKQTALVELLK	0,Acetyl[AnyN-term]#0;4,HTL_AC_azide#0;	0.011	1769.06	1769.06	-0.00047	-0.27	TRUE
	2	SLGKVGTR	0,Acetyl[AnyN-term]#0;4,HTL_AC_azide#0;	0.39	1074.6	1074.6	0.00277	2.57	TRUE
	2	SLGKVGTR	0,Acetyl[AnyN-term]#0;4,HTL_AC_azide#0;	0.393	1074.6	1074.6	0.0001	0.09	TRUE
	2	CCAADDKEACFAVEGPK	0,Acetyl[AnyN-term]#0;7,HTL_AC_azide#0;10,Carbamidomethyl[C]#0;	0.0149	2070.82	2070.86	-0.03946	-19.05	TRUE
	3	QNCDQFEKLGEYGFQNALIVR	0,Acetyl[AnyN-term]#0;8,HTL_AC_azide#0;	0.000192	2729.3	2729.31	-0.00519	-1.9	TRUE
	4	SHCIAEVEKDAIPENLPPLTADFAEDKDVCK	0,Acetyl[AnyN-term]#0;9,HTL_AC_azide#0;30,Carbamidomethyl[C]#0;	0.157	3711.83	3711.76	0.07335	19.76	TRUE
	3	CCTKPESER	1,Carbamidomethyl[C]#0;2,Carbamidomethyl[C]#0;4,HTL_AC_azide#0;	0.00111	1381.59	1381.59	0.00109	0.79	TRUE
	2	CCTKPESER	1,Carbamidomethyl[C]#0;2,Carbamidomethyl[C]#0;4,HTL_AC_azide#0;	0.00249	1381.59	1381.59	0.00351	2.54	TRUE
	2	CCTKPESER	1,Carbamidomethyl[C]#0;2,Carbamidomethyl[C]#0;4,HTL_AC_azide#0;	0.0033	1381.59	1381.59	0.00316	2.29	TRUE
	2	CCTKPESER	1,Carbamidomethyl[C]#0;2,Carbamidomethyl[C]#0;4,HTL_AC_azide#0;	0.00357	1381.59	1381.59	0.00138	1	TRUE
	2	CCTKPESER	1,Carbamidomethyl[C]#0;2,Carbamidomethyl[C]#0;4,HTL_AC_azide#0;	0.00363	1381.59	1381.59	0.00182	1.31	TRUE
	2	CCTKPESER	1,Carbamidomethyl[C]#0;2,Carbamidomethyl[C]#0;4,HTL_AC_azide#0;	0.00378	1381.59	1381.59	0.00262	1.9	TRUE
	2	CCTKPESER	1,Carbamidomethyl[C]#0;2,Carbamidomethyl[C]#0;4,HTL_AC_azide#0;	0.00408	1381.59	1381.59	0.00307	2.22	TRUE
	2	CCTKPESER	1,Carbamidomethyl[C]#0;2,Carbamidomethyl[C]#0;4,HTL_AC_azide#0;	0.00418	1381.59	1381.59	0.00149	1.08	TRUE
	2	CCTKPESER	1,Carbamidomethyl[C]#0;2,Carbamidomethyl[C]#0;4,HTL_AC_azide#0;	0.00425	1381.59	1381.59	-0.00089	-0.64	TRUE
	2	CCTKPESER	1,Carbamidomethyl[C]#0;2,Carbamidomethyl[C]#0;4,HTL_AC_azide#0;	0.00427	1381.59	1381.59	-4e-05	-0.03	TRUE
	2	CCTKPESER	1,Carbamidomethyl[C]#0;2,Carbamidomethyl[C]#0;4,HTL_AC_azide#0;	0.00431	1381.59	1381.59	0.00051	0.37	TRUE
	2	CCTKPESER	1,Carbamidomethyl[C]#0;2,Carbamidomethyl[C]#0;4,HTL_AC_azide#0;	0.00457	1381.59	1381.59	0.00116	0.84	TRUE
	2	CCTKPESER	1,Carbamidomethyl[C]#0;2,Carbamidomethyl[C]#0;4,HTL_AC_azide#0;	0.00521	1381.59	1381.59	0.00312	2.25	TRUE
	2	CCTKPESER	1,Carbamidomethyl[C]#0;2,Carbamidomethyl[C]#0;4,HTL_AC_azide#0;	0.00535	1381.59	1381.59	0.0001	0.07	TRUE
	2	CCTKPESER	1,Carbamidomethyl[C]#0;2,Carbamidomethyl[C]#0;4,HTL_AC_azide#0;	0.0069	1381.59	1381.59	0.00027	0.19	TRUE
	2	CCTKPESER	1,Carbamidomethyl[C]#0;2,Carbamidomethyl[C]#0;4,HTL_AC_azide#0;	0.0162	1381.6	1381.59	0.00717	5.19	TRUE
	2	CCTKPESER	1,Carbamidomethyl[C]#0;2,Carbamidomethyl[C]#0;4,HTL_AC_azide#0;	0.0186	1381.6	1381.59	0.00507	3.67	TRUE
	2	CCTKPESER	1,Carbamidomethyl[C]#0;2,Carbamidomethyl[C]#0;4,HTL_AC_azide#0;	0.019	1381.6	1381.59	0.0042	3.04	TRUE
	3	CCTKPESER	1,Carbamidomethyl[C]#0;2,Carbamidomethyl[C]#0;4,HTL_AC_azide#0;	0.0225	1381.59	1381.59	0.00207	1.5	TRUE
	3	CCTKPESER	1,Carbamidomethyl[C]#0;2,Carbamidomethyl[C]#0;4,HTL_AC_azide#0;	0.0248	1381.59	1381.59	0.00284	2.06	TRUE
	3	CCTKPESER	1,Carbamidomethyl[C]#0;2,Carbamidomethyl[C]#0;4,HTL_AC_azide#0;	0.0248	1381.59	1381.59	0.00349	2.53	TRUE
	3	CCTKPESER	1,Carbamidomethyl[C]#0;2,Carbamidomethyl[C]#0;4,HTL_AC_azide#0;	0.0273	1381.59	1381.59	0.00356	2.57	TRUE
	3	CCTKPESER	1,Carbamidomethyl[C]#0;2,Carbamidomethyl[C]#0;4,HTL_AC_azide#0;	0.0286	1381.59	1381.59	0.00357	2.58	TRUE
	3	CCTKPESER	1,Carbamidomethyl[C]#0;2,Carbamidomethyl[C]#0;4,HTL_AC_azide#0;	0.0293	1381.59	1381.59	0.00384	2.78	TRUE
	3	CCTKPESER	1,Carbamidomethyl[C]#0;2,Carbamidomethyl[C]#0;4,HTL_AC_azide#0;	0.0295	1381.59	1381.59	0.00353	2.55	TRUE
	3	CCTKPESER	1,Carbamidomethyl[C]#0;2,Carbamidomethyl[C]#0;4,HTL_AC_azide#0;	0.0295	1381.59	1381.59	0.00403	2.91	TRUE
	3	CCTKPESER	1,Carbamidomethyl[C]#0;2,Carbamidomethyl[C]#0;4,HTL_AC_azide#0;	0.0317	1381.59	1381.59	0.00397	2.87	TRUE
	3	CCTKPESER	1,Carbamidomethyl[C]#0;2,Carbamidomethyl[C]#0;4,HTL_AC_azide#0;	0.0322	1381.59	1381.59	0.00401	2.9	TRUE
	3	CCTKPESER	1,Carbamidomethyl[C]#0;2,Carbamidomethyl[C]#0;4,HTL_AC_azide#0;	0.0339	1381.59	1381.59	0.00193	1.4	TRUE
	3	CCTKPESER	1,Carbamidomethyl[C]#0;2,Carbamidomethyl[C]#0;4,HTL_AC_azide#0;	0.0348	1381.59	1381.59	0.00183	1.32	TRUE
	3	CCTKPESER	1,Carbamidomethyl[C]#0;2,Carbamidomethyl[C]#0;4,HTL_AC_azide#0;	0.0371	1381.59	1381.59	0.00103	0.75	TRUE
	3	CCTKPESER	1,Carbamidomethyl[C]#0;2,Carbamidomethyl[C]#0;4,HTL_AC_azide#0;	0.0381	1381.59	1381.59	0.00226	1.64	TRUE
	3	CCTKPESER	1,Carbamidomethyl[C]#0;2,Carbamidomethyl[C]#0;4,HTL_AC_azide#0;	0.0387	1381.59	1381.59	0.00261	1.89	TRUE
	3	CCTKPESER	1,Carbamidomethyl[C]#0;2,Carbamidomethyl[C]#0;4,HTL_AC_azide#0;	0.0399	1381.59	1381.59	-0.00324	-2.34	TRUE
	2	CCTKPESER	1,Carbamidomethyl[C]#0;2,Carbamidomethyl[C]#0;4,HTL_AC_azide#0;	0.0401	1381.59	1381.59	0.00312	2.26	TRUE
	3	CCTKPESER	1,Carbamidomethyl[C]#0;2,Carbamidomethyl[C]#0;4,HTL_AC_azide#0;	0.0402	1381.59	1381.59	0.0004	0.29	TRUE
	3	CCTKPESER	1,Carbamidomethyl[C]#0;2,Carbamidomethyl[C]#0;4,HTL_AC_azide#0;	0.0413	1381.59	1381.59	0.00054	0.39	TRUE
	2	CCTKPESER	1,Carbamidomethyl[C]#0;2,Carbamidomethyl[C]#0;4,HTL_AC_azide#0;	0.0516	1381.6	1381.59	0.00425	3.07	TRUE
	3	CCTKPESER	1,Carbamidomethyl[C]#0;2,Carbamidomethyl[C]#0;4,HTL_AC_azide#0;	0.0517	1381.59	1381.59	0.00154	1.11	TRUE
	3	CCTKPESER	1,Carbamidomethyl[C]#0;2,Carbamidomethyl[C]#0;4,HTL_AC_azide#0;	0.0675	1381.59	1381.59	0.00219	1.58	TRUE
	2	CCTKPESER	1,Carbamidomethyl[C]#0;2,Carbamidomethyl[C]#0;4,HTL_AC_azide#0;	0.0702	1381.59	1381.59	0.00373	2.7	TRUE
	2	CCTKPESER	1,Carbamidomethyl[C]#0;2,Carbamidomethyl[C]#0;4,HTL_AC_azide#0;	0.0743	1381.6	1381.59	0.00431	3.12	TRUE
	3	CCTKPESER	1,Carbamidomethyl[C]#0;2,Carbamidomethyl[C]#0;4,HTL_AC_azide#0;	0.0846	1381.59	1381.59	0.00349	2.53	TRUE
	2	CCTKPESER	1,Carbamidomethyl[C]#0;2,Carbamidomethyl[C]#0;4,HTL_AC_azide#0;	0.0908	1381.6	1381.59	0.00477	3.45	TRUE
	3	CCTKPESER	1,Carbamidomethyl[C]#0;2,Carbamidomethyl[C]#0;4,HTL_AC_azide#0;	0.0964	1381.59	1381.59	0.00329	2.38	TRUE
	3	CCTKPESER	1,Carbamidomethyl[C]#0;2,Carbamidomethyl[C]#0;4,HTL_AC_azide#0;	0.0977	1381.59	1381.59	0.00207	1.5	TRUE
	2	CCTKPESER	1,Carbamidomethyl[C]#0;2,Carbamidomethyl[C]#0;4,HTL_AC_azide#0;	0.112	1381.59	1381.59	0.00165	1.19	TRUE
	2	CCTKPESER	1,Carbamidomethyl[C]#0;2,Carbamidomethyl[C]#0;4,HTL_AC_azide#0;	0.125	1381.59	1381.59	-0.00244	-1.77	TRUE
	3	CCTKPESER	1,Carbamidomethyl[C]#0;2,Carbamidomethyl[C]#0;4,HTL_AC_azide#0;	0.158	1381.59	1381.59	0.00332	2.4	TRUE
	3	CCTKPESER	1,Carbamidomethyl[C]#0;2,Carbamidomethyl[C]#0;4,HTL_AC_azide#0;	0.17	1381.59	1381.59	0.00184	1.33	TRUE
	3	CCTKPESER	1,Carbamidomethyl[C]#0;2,Carbamidomethyl[C]#0;4,HTL_AC_azide#0;	0.196	1381.59	1381.59	0.00245	1.77	TRUE
	3	CCTKPESER	1,Carbamidomethyl[C]#0;2,Carbamidomethyl[C]#0;4,HTL_AC_azide#0;	0.201	1381.59	1381.59	0.00199	1.44	TRUE
	3	CCTKPESER	1,Carbamidomethyl[C]#0;2,Carbamidomethyl[C]#0;4,HTL_AC_azide#0;	0.202	1381.59	1381.59	0.00107	0.78	TRUE
	2	CCTKPESER	1,Carbamidomethyl[C]#0;2,Carbamidomethyl[C]#0;4,HTL_AC_azide#0;	0.26	1381.6	1381.59	0.00604	4.37	TRUE
	3	CCTKPESER	1,Carbamidomethyl[C]#0;2,Carbamidomethyl[C]#0;4,HTL_AC_azide#0;	0.324	1381.59	1381.59	0.00191	1.38	TRUE
	3	CCTKPESER	1,Carbamidomethyl[C]#0;2,Carbamidomethyl[C]#0;4,HTL_AC_azide#0;	0.377	1381.6	1381.59	0.00465	3.37	TRUE
	4	CCTKPESERMPCTEDYLSLILNR	1,Carbamidomethyl[C]#0;4,HTL_AC_azide#0;	0.00397	2973.4	2973.36	0.03615	12.16	TRUE
	4	CCTKPESERMPCTEDYLSLILNR	1,Carbamidomethyl[C]#0;4,HTL_AC_azide#0;	0.0418	2973.4	2973.36	0.03189	10.73	TRUE
	3	CCTKPESERMPCTEDYLSLILNR	1,Carbamidomethyl[C]#0;4,HTL_AC_azide#0;	0.137	2973.41	2973.36	0.0458	15.4	TRUE
	2	CASIQKFGER	1,Carbamidomethyl[C]#0;6,HTL_AC_azide#0;	0.000513	1410.69	1410.69	0.00231	1.64	TRUE
	2	CASIQKFGER	1,Carbamidomethyl[C]#0;6,HTL_AC_azide#0;	0.000771	1410.69	1410.69	0.00111	0.79	TRUE
	2	CASIQKFGER	1,Carbamidomethyl[C]#0;6,HTL_AC_azide#0;	0.00474	1410.69	1410.69	0.00203	1.44	TRUE
	2	CASIQKFGER	1,Carbamidomethyl[C]#0;6,HTL_AC_azide#0;	0.011	1410.69	1410.69	0.0015	1.06	TRUE
	2	CASIQKFGER	1,Carbamidomethyl[C]#0;6,HTL_AC_azide#0;	0.0113	1410.69	1410.69	0.00334	2.37	TRUE
	3	CASIQKFGER	1,Carbamidomethyl[C]#0;6,HTL_AC_azide#0;	0.0193	1410.69	1410.69	0.00296	2.1	TRUE
	3	CASIQKFGER	1,Carbamidomethyl[C]#0;6,HTL_AC_azide#0;	0.0296	1410.69	1410.69	0.00414	2.94	TRUE
	3	CASIQKFGER	1,Carbamidomethyl[C]#0;6,HTL_AC_azide#0;	0.0301	1410.69	1410.69	0.00332	2.35	TRUE
	3	CASIQKFGER	1,Carbamidomethyl[C]#0;6,HTL_AC_azide#0;	0.0302	1410.69	1410.69	0.00261	1.85	TRUE
	3	CASIQKFGER	1,Carbamidomethyl[C]#0;6,HTL_AC_azide#0;	0.04	1410.69	1410.69	0.00249	1.77	TRUE
	3	CASIQKFGER	1,Carbamidomethyl[C]#0;6,HTL_AC_azide#0;	0.0456	1410.69	1410.69	0.00186	1.32	TRUE
	3	CASIQKFGER	1,Carbamidomethyl[C]#0;6,HTL_AC_azide#0;	0.0539	1410.69	1410.69	0.00353	2.5	TRUE
	3	CASIQKFGER	1,Carbamidomethyl[C]#0;6,HTL_AC_azide#0;	0.0575	1410.69	1410.69	0.00262	1.86	TRUE
	3	CASIQKFGER	1,Carbamidomethyl[C]#0;6,HTL_AC_azide#0;	0.0603	1410.69	1410.69	0.00256	1.82	TRUE
	3	CASIQKFGER	1,Carbamidomethyl[C]#0;6,HTL_AC_azide#0;	0.0761	1410.69	1410.69	0.00437	3.09	TRUE
	3	CASIQKFGER	1,Carbamidomethyl[C]#0;6,HTL_AC_azide#0;	0.0842	1410.69	1410.69	0.00448	3.17	TRUE
	3	CASIQKFGER	1,Carbamidomethyl[C]#0;6,HTL_AC_azide#0;	0.106	1410.69	1410.69	0.00341	2.42	TRUE
	3	CASIQKFGER	1,Carbamidomethyl[C]#0;6,HTL_AC_azide#0;	0.119	1410.69	1410.69	0.00437	3.09	TRUE
	2	CASIQKFGER	1,Carbamidomethyl[C]#0;6,HTL_AC_azide#0;	0.122	1410.69	1410.69	0.00295	2.09	TRUE
	3	CASIQKFGER	1,Carbamidomethyl[C]#0;6,HTL_AC_azide#0;	0.128	1410.69	1410.69	0.00356	2.52	TRUE
	3	CASIQKFGER	1,Carbamidomethyl[C]#0;6,HTL_AC_azide#0;	0.141	1410.69	1410.69	0.00154	1.09	TRUE
	2	CASIQKFGER	1,Carbamidomethyl[C]#0;6,HTL_AC_azide#0;	0.143	1410.69	1410.69	0.00326	2.31	TRUE
	2	CASIQKFGER	1,Carbamidomethyl[C]#0;6,HTL_AC_azide#0;	0.15	1410.69	1410.69	0.00334	2.37	TRUE
	3	CASIQKFGER	1,Carbamidomethyl[C]#0;6,HTL_AC_azide#0;	0.151	1410.69	1410.69	0.00278	1.97	TRUE
	3	CASIQKFGER	1,Carbamidomethyl[C]#0;6,HTL_AC_azide#0;	0.154	1410.69	1410.69	0.00314	2.22	TRUE
	3	CASIQKFGER	1,Carbamidomethyl[C]#0;6,HTL_AC_azide#0;	0.159	1410.69	1410.69	0.00346	2.45	TRUE
	3	CASIQKFGER	1,Carbamidomethyl[C]#0;6,HTL_AC_azide#0;	0.174	1410.69	1410.69	0.00226	1.6	TRUE
	3	CASIQKFGER	1,Carbamidomethyl[C]#0;6,HTL_AC_azide#0;	0.202	1410.69	1410.69	0.00449	3.18	TRUE
	3	CASIQKFGER	1,Carbamidomethyl[C]#0;6,HTL_AC_azide#0;	0.251	1410.69	1410.69	0.0014	0.99	TRUE
	3	CASIQKFGER	1,Carbamidomethyl[C]#0;6,HTL_AC_azide#0;	0.256	1410.69	1410.69	0.0035	2.48	TRUE
	2	CASIQKFGER	1,Carbamidomethyl[C]#0;6,HTL_AC_azide#0;	0.292	1410.69	1410.69	0.00275	1.95	TRUE
	3	CASIQKFGER	1,Carbamidomethyl[C]#0;6,HTL_AC_azide#0;	0.369	1410.69	1410.69	0.00358	2.54	TRUE
	3	CCAADDKEACFAVEGPK	1,Carbamidomethyl[C]#0;7,HTL_AC_azide#0;	0.000296	2028.89	2028.85	0.03584	17.66	TRUE
	3	CCAADDKEACFAVEGPK	1,Carbamidomethyl[C]#0;7,HTL_AC_azide#0;	0.00161	2028.89	2028.85	0.03439	16.95	TRUE
	3	CCAADDKEACFAVEGPK	1,Carbamidomethyl[C]#0;7,HTL_AC_azide#0;	0.00223	2028.89	2028.85	0.0322	15.87	TRUE
	3	CCAADDKEACFAVEGPK	1,Carbamidomethyl[C]#0;7,HTL_AC_azide#0;	0.00933	2028.89	2028.85	0.03247	16	TRUE
	3	KVPQVSTPTLVEVSR	1,HTL_AC_azide#0;	5.11e-06	1855.04	1855.04	0.00618	3.33	TRUE
	3	KVPQVSTPTLVEVSR	1,HTL_AC_azide#0;	1.13e-05	1855.05	1855.04	0.01142	6.15	TRUE
	3	KVPQVSTPTLVEVSR	1,HTL_AC_azide#0;	1.41e-05	1855.05	1855.04	0.01367	7.37	TRUE
	2	KVPQVSTPTLVEVSR	1,HTL_AC_azide#0;	1.62e-05	1855.04	1855.04	0.00439	2.37	TRUE
	3	KVPQVSTPTLVEVSR	1,HTL_AC_azide#0;	0.000125	1855.05	1855.04	0.01372	7.39	TRUE
	3	KVPQVSTPTLVEVSR	1,HTL_AC_azide#0;	0.000889	1855.05	1855.04	0.00981	5.29	TRUE
	2	KVPQVSTPTLVEVSR	1,HTL_AC_azide#0;	0.00202	1855.04	1855.04	0.00526	2.83	TRUE
	2	KVPQVSTPTLVEVSR	1,HTL_AC_azide#0;	0.00406	1855.04	1855.04	0.00527	2.84	TRUE
	2	KVPQVSTPTLVEVSR	1,HTL_AC_azide#0;	0.00903	1855.04	1855.04	0.0049	2.64	TRUE
	2	KVPQVSTPTLVEVSR	1,HTL_AC_azide#0;	0.0148	1855.04	1855.04	0.00788	4.25	TRUE
	2	KVPQVSTPTLVEVSR	1,HTL_AC_azide#0;	0.0177	1855.04	1855.04	0.00863	4.65	TRUE
	3	KVPQVSTPTLVEVSR	1,HTL_AC_azide#0;	0.0225	1855.04	1855.04	0.00761	4.1	TRUE
	2	KVPQVSTPTLVEVSR	1,HTL_AC_azide#0;	0.117	1855.04	1855.04	0.00471	2.54	TRUE
	2	KVPQVSTPTLVEVSR	1,HTL_AC_azide#0;	0.214	1855.04	1855.04	0.00084	0.45	TRUE
	2	KVPQVSTPTLVEVSR	1,HTL_AC_azide#0;	0.324	1855.04	1855.04	0.00218	1.18	TRUE
	2	KQTALVELLK	1,HTL_AC_azide#0;	7.03e-06	1357.81	1357.81	0.00153	1.13	TRUE
	2	KQTALVELLK	1,HTL_AC_azide#0;	2.29e-05	1357.81	1357.81	0.00158	1.16	TRUE
	3	KQTALVELLK	1,HTL_AC_azide#0;	0.000207	1357.81	1357.81	0.00195	1.43	TRUE
	3	KQTALVELLK	1,HTL_AC_azide#0;	0.000217	1357.82	1357.81	0.00292	2.15	TRUE
	3	KQTALVELLK	1,HTL_AC_azide#0;	0.000218	1357.82	1357.81	0.00276	2.03	TRUE
	3	KQTALVELLK	1,HTL_AC_azide#0;	0.000226	1357.82	1357.81	0.00299	2.2	TRUE
	3	KQTALVELLK	1,HTL_AC_azide#0;	0.000243	1357.82	1357.81	0.00355	2.62	TRUE
	3	KQTALVELLK	1,HTL_AC_azide#0;	0.000247	1357.82	1357.81	0.00328	2.41	TRUE
	3	KQTALVELLK	1,HTL_AC_azide#0;	0.000274	1357.82	1357.81	0.00321	2.36	TRUE
	3	KQTALVELLK	1,HTL_AC_azide#0;	0.00031	1357.81	1357.81	0.00242	1.78	TRUE
	3	KQTALVELLK	1,HTL_AC_azide#0;	0.000315	1357.82	1357.81	0.0029	2.13	TRUE
	3	KFWGKYLYEIAR	1,HTL_AC_azide#0;	0.000315	1788.95	1788.95	0.00339	1.89	TRUE
	3	KFWGKYLYEIAR	1,HTL_AC_azide#0;	0.000317	1788.95	1788.95	0.00324	1.81	TRUE
	3	KQTALVELLK	1,HTL_AC_azide#0;	0.000323	1357.82	1357.81	0.00279	2.06	TRUE
	3	KFWGKYLYEIAR	1,HTL_AC_azide#0;	0.000347	1788.95	1788.95	0.00325	1.81	TRUE
	3	KQTALVELLK	1,HTL_AC_azide#0;	0.000347	1357.82	1357.81	0.00359	2.64	TRUE
	3	KQTALVELLK	1,HTL_AC_azide#0;	0.000359	1357.82	1357.81	0.00361	2.66	TRUE
	3	KQTALVELLK	1,HTL_AC_azide#0;	0.00036	1357.82	1357.81	0.00314	2.31	TRUE
	3	KQTALVELLK	1,HTL_AC_azide#0;	0.000366	1357.82	1357.81	0.00382	2.81	TRUE
	3	KQTALVELLK	1,HTL_AC_azide#0;	0.000377	1357.82	1357.81	0.00375	2.76	TRUE
	3	KFWGKYLYEIAR	1,HTL_AC_azide#0;	0.000377	1788.95	1788.95	0.00297	1.66	TRUE
	3	KFWGKYLYEIAR	1,HTL_AC_azide#0;	0.000397	1788.95	1788.95	0.00266	1.49	TRUE
	3	KQTALVELLK	1,HTL_AC_azide#0;	0.000401	1357.82	1357.81	0.00279	2.05	TRUE
	3	KQTALVELLK	1,HTL_AC_azide#0;	0.000407	1357.82	1357.81	0.00333	2.46	TRUE
	3	KFWGKYLYEIAR	1,HTL_AC_azide#0;	0.000413	1788.95	1788.95	0.00346	1.93	TRUE
	3	KFWGKYLYEIAR	1,HTL_AC_azide#0;	0.00044	1788.95	1788.95	0.00262	1.47	TRUE
	3	KQTALVELLK	1,HTL_AC_azide#0;	0.000449	1357.82	1357.81	0.00357	2.63	TRUE
	2	KQTALVELLK	1,HTL_AC_azide#0;	0.000472	1357.82	1357.81	0.00309	2.27	TRUE
	3	KQTALVELLK	1,HTL_AC_azide#0;	0.000498	1357.82	1357.81	0.00354	2.6	TRUE
	3	KQTALVELLK	1,HTL_AC_azide#0;	0.000521	1357.82	1357.81	0.00289	2.12	TRUE
	3	KQTALVELLK	1,HTL_AC_azide#0;	0.000538	1357.81	1357.81	0.0027	1.99	TRUE
	2	KQTALVELLK	1,HTL_AC_azide#0;	0.000544	1357.82	1357.81	0.00576	4.24	TRUE
	3	KFWGKYLYEIAR	1,HTL_AC_azide#0;	0.000563	1788.95	1788.95	0.00277	1.55	TRUE
	2	KQTALVELLK	1,HTL_AC_azide#0;	0.000565	1357.82	1357.81	0.00374	2.75	TRUE
	3	KFWGKYLYEIAR	1,HTL_AC_azide#0;	0.000567	1788.95	1788.95	0.00171	0.96	TRUE
	3	KQTALVELLK	1,HTL_AC_azide#0;	0.000567	1357.82	1357.81	0.00346	2.55	TRUE
	3	KQTALVELLK	1,HTL_AC_azide#0;	0.000578	1357.82	1357.81	0.00282	2.08	TRUE
	3	KQTALVELLK	1,HTL_AC_azide#0;	0.000584	1357.81	1357.81	0.00206	1.52	TRUE
	3	KQTALVELLK	1,HTL_AC_azide#0;	0.000586	1357.82	1357.81	0.0028	2.06	TRUE
	3	KQTALVELLK	1,HTL_AC_azide#0;	0.000643	1357.82	1357.81	0.00288	2.12	TRUE
	3	KQTALVELLK	1,HTL_AC_azide#0;	0.000652	1357.82	1357.81	0.00287	2.11	TRUE
	2	KQTALVELLK	1,HTL_AC_azide#0;	0.000654	1357.82	1357.81	0.00311	2.29	TRUE
	3	KQTALVELLK	1,HTL_AC_azide#0;	0.000666	1357.81	1357.81	0.00149	1.1	TRUE
	2	KQTALVELLK	1,HTL_AC_azide#0;	0.000669	1357.81	1357.81	0.00265	1.95	TRUE
	2	KQTALVELLK	1,HTL_AC_azide#0;	0.000726	1357.81	1357.81	0.00223	1.64	TRUE
	3	KQTALVELLK	1,HTL_AC_azide#0;	0.000748	1357.81	1357.81	0.00231	1.7	TRUE
	3	KQTALVELLK	1,HTL_AC_azide#0;	0.000752	1357.81	1357.81	0.00183	1.35	TRUE
	3	KQTALVELLK	1,HTL_AC_azide#0;	0.000752	1357.82	1357.81	0.00492	3.62	TRUE
	2	KQTALVELLK	1,HTL_AC_azide#0;	0.000789	1357.82	1357.81	0.00396	2.92	TRUE
	2	KQTALVELLK	1,HTL_AC_azide#0;	0.000804	1357.82	1357.81	0.00703	5.18	TRUE
	3	KQTALVELLK	1,HTL_AC_azide#0;	0.000818	1357.81	1357.81	0.00107	0.79	TRUE
	2	KQTALVELLK	1,HTL_AC_azide#0;	0.000829	1357.81	1357.81	0.00242	1.78	TRUE
	3	KQTALVELLK	1,HTL_AC_azide#0;	0.000838	1357.81	1357.81	0.00121	0.89	TRUE
	2	KQTALVELLK	1,HTL_AC_azide#0;	0.00084	1357.82	1357.81	0.00293	2.16	TRUE
	2	KQTALVELLK	1,HTL_AC_azide#0;	0.000841	1357.82	1357.81	0.00279	2.05	TRUE
	2	KQTALVELLK	1,HTL_AC_azide#0;	0.000857	1357.81	1357.81	0.00272	2	TRUE
	2	KQTALVELLK	1,HTL_AC_azide#0;	0.000885	1357.82	1357.81	0.00319	2.35	TRUE
	2	KQTALVELLK	1,HTL_AC_azide#0;	0.000887	1357.82	1357.81	0.00325	2.39	TRUE
	2	KQTALVELLK	1,HTL_AC_azide#0;	0.000906	1357.82	1357.81	0.00365	2.68	TRUE
	2	KQTALVELLK	1,HTL_AC_azide#0;	0.00092	1357.82	1357.81	0.00352	2.59	TRUE
	2	KQTALVELLK	1,HTL_AC_azide#0;	0.000936	1357.81	1357.81	0.00206	1.52	TRUE
	3	KQTALVELLK	1,HTL_AC_azide#0;	0.000996	1357.82	1357.81	0.00282	2.07	TRUE
	2	KQTALVELLK	1,HTL_AC_azide#0;	0.001	1357.82	1357.81	0.00303	2.23	TRUE
	2	KQTALVELLK	1,HTL_AC_azide#0;	0.00101	1357.82	1357.81	0.00288	2.12	TRUE
	3	KQTALVELLK	1,HTL_AC_azide#0;	0.00101	1357.81	1357.81	0.00224	1.65	TRUE
	2	KQTALVELLK	1,HTL_AC_azide#0;	0.00101	1357.82	1357.81	0.00596	4.39	TRUE
	2	KQTALVELLK	1,HTL_AC_azide#0;	0.00102	1357.82	1357.81	0.00442	3.25	TRUE
	2	KQTALVELLK	1,HTL_AC_azide#0;	0.00103	1357.82	1357.81	0.00402	2.96	TRUE
	2	KQTALVELLK	1,HTL_AC_azide#0;	0.00106	1357.82	1357.81	0.0035	2.58	TRUE
	2	KQTALVELLK	1,HTL_AC_azide#0;	0.00108	1357.82	1357.81	0.003	2.21	TRUE
	2	KQTALVELLK	1,HTL_AC_azide#0;	0.00109	1357.82	1357.81	0.00501	3.69	TRUE
	2	KQTALVELLK	1,HTL_AC_azide#0;	0.0011	1357.81	1357.81	0.00196	1.44	TRUE
	2	KQTALVELLK	1,HTL_AC_azide#0;	0.00112	1357.82	1357.81	0.00367	2.7	TRUE
	2	KQTALVELLK	1,HTL_AC_azide#0;	0.00118	1357.82	1357.81	0.0032	2.36	TRUE
	3	KQTALVELLK	1,HTL_AC_azide#0;	0.00118	1357.82	1357.81	0.00327	2.41	TRUE
	2	KQTALVELLK	1,HTL_AC_azide#0;	0.00121	1357.82	1357.81	0.00292	2.15	TRUE
	2	KQTALVELLK	1,HTL_AC_azide#0;	0.00122	1357.82	1357.81	0.00274	2.01	TRUE
	3	KQTALVELLK	1,HTL_AC_azide#0;	0.00124	1357.82	1357.81	0.004	2.94	TRUE
	2	KQTALVELLK	1,HTL_AC_azide#0;	0.00126	1357.82	1357.81	0.00594	4.38	TRUE
	2	KQTALVELLK	1,HTL_AC_azide#0;	0.00128	1357.82	1357.81	0.00421	3.1	TRUE
	3	KQTALVELLK	1,HTL_AC_azide#0;	0.0013	1357.82	1357.81	0.0031	2.28	TRUE
	3	KQTALVELLK	1,HTL_AC_azide#0;	0.00132	1357.82	1357.81	0.00423	3.11	TRUE
	2	KQTALVELLK	1,HTL_AC_azide#0;	0.0014	1357.81	1357.81	0.00258	1.9	TRUE
	2	KQTALVELLK	1,HTL_AC_azide#0;	0.0015	1357.82	1357.81	0.0043	3.17	TRUE
	2	KQTALVELLK	1,HTL_AC_azide#0;	0.00152	1357.82	1357.81	0.00293	2.16	TRUE
	2	KQTALVELLK	1,HTL_AC_azide#0;	0.00155	1357.82	1357.81	0.00522	3.84	TRUE
	2	KQTALVELLK	1,HTL_AC_azide#0;	0.00159	1357.82	1357.81	0.00425	3.13	TRUE
	2	KQTALVELLK	1,HTL_AC_azide#0;	0.00161	1357.82	1357.81	0.00439	3.23	TRUE
	2	KQTALVELLK	1,HTL_AC_azide#0;	0.00163	1357.82	1357.81	0.00421	3.1	TRUE
	2	KQTALVELLK	1,HTL_AC_azide#0;	0.00164	1357.82	1357.81	0.00592	4.36	TRUE
	2	KQTALVELLK	1,HTL_AC_azide#0;	0.00168	1357.82	1357.81	0.00316	2.33	TRUE
	2	KQTALVELLK	1,HTL_AC_azide#0;	0.0017	1357.82	1357.81	0.0029	2.13	TRUE
	3	KQTALVELLK	1,HTL_AC_azide#0;	0.00174	1357.82	1357.81	0.00384	2.83	TRUE
	3	KQTALVELLK	1,HTL_AC_azide#0;	0.00177	1357.81	1357.81	0.00045	0.33	TRUE
	3	KQTALVELLK	1,HTL_AC_azide#0;	0.00177	1357.81	1357.81	0.00147	1.08	TRUE
	3	KFWGKYLYEIAR	1,HTL_AC_azide#0;	0.00179	1788.95	1788.95	0.00203	1.14	TRUE
	2	KQTALVELLK	1,HTL_AC_azide#0;	0.0018	1357.82	1357.81	0.00465	3.43	TRUE
	2	KQTALVELLK	1,HTL_AC_azide#0;	0.00181	1357.82	1357.81	0.00528	3.89	TRUE
	3	KFWGKYLYEIAR	1,HTL_AC_azide#0;	0.00193	1788.95	1788.95	0.00241	1.35	TRUE
	2	KQTALVELLK	1,HTL_AC_azide#0;	0.00196	1357.82	1357.81	0.00823	6.06	TRUE
	2	KQTALVELLK	1,HTL_AC_azide#0;	0.00196	1357.82	1357.81	0.00481	3.54	TRUE
	2	KQTALVELLK	1,HTL_AC_azide#0;	0.00219	1357.81	1357.81	0.00265	1.95	TRUE
	2	KQTALVELLK	1,HTL_AC_azide#0;	0.00219	1357.82	1357.81	0.003	2.21	TRUE
	3	KQTALVELLK	1,HTL_AC_azide#0;	0.00225	1357.82	1357.81	0.00377	2.78	TRUE
	2	KQTALVELLK	1,HTL_AC_azide#0;	0.00238	1357.82	1357.81	0.00339	2.5	TRUE
	2	KQTALVELLK	1,HTL_AC_azide#0;	0.00244	1357.81	1357.81	0.00201	1.48	TRUE
	2	KQTALVELLK	1,HTL_AC_azide#0;	0.00244	1357.81	1357.81	0.00034	0.25	TRUE
	2	KQTALVELLK	1,HTL_AC_azide#0;	0.00244	1357.82	1357.81	0.00402	2.96	TRUE
	2	KQTALVELLK	1,HTL_AC_azide#0;	0.0028	1357.81	1357.81	0.00258	1.9	TRUE
	2	KQTALVELLK	1,HTL_AC_azide#0;	0.00283	1357.82	1357.81	0.00573	4.22	TRUE
	2	KQTALVELLK	1,HTL_AC_azide#0;	0.00299	1357.82	1357.81	0.00313	2.31	TRUE
	3	KQTALVELLK	1,HTL_AC_azide#0;	0.00305	1357.81	1357.81	0.0024	1.77	TRUE
	2	KQTALVELLK	1,HTL_AC_azide#0;	0.00306	1357.82	1357.81	0.00525	3.87	TRUE
	2	KQTALVELLK	1,HTL_AC_azide#0;	0.00323	1357.81	1357.81	0.00254	1.87	TRUE
	2	KQTALVELLK	1,HTL_AC_azide#0;	0.00345	1357.81	1357.81	-0.00065	-0.48	TRUE
	2	KQTALVELLK	1,HTL_AC_azide#0;	0.00346	1357.82	1357.81	0.00629	4.64	TRUE
	2	KQTALVELLK	1,HTL_AC_azide#0;	0.00348	1357.81	1357.81	-0.00049	-0.36	TRUE
	3	KQTALVELLK	1,HTL_AC_azide#0;	0.00353	1357.82	1357.81	0.00429	3.16	TRUE
	2	KQTALVELLK	1,HTL_AC_azide#0;	0.00375	1357.82	1357.81	0.00307	2.26	TRUE
	2	KQTALVELLK	1,HTL_AC_azide#0;	0.00375	1357.82	1357.81	0.00558	4.11	TRUE
	2	KQTALVELLK	1,HTL_AC_azide#0;	0.00406	1357.82	1357.81	0.00557	4.1	TRUE
	2	KQTALVELLK	1,HTL_AC_azide#0;	0.00437	1357.82	1357.81	0.00395	2.91	TRUE
	2	KQTALVELLK	1,HTL_AC_azide#0;	0.00454	1357.82	1357.81	0.00432	3.18	TRUE
	2	KQTALVELLK	1,HTL_AC_azide#0;	0.00458	1357.82	1357.81	0.0038	2.8	TRUE
	3	KQTALVELLK	1,HTL_AC_azide#0;	0.00465	1357.82	1357.81	0.00288	2.12	TRUE
	3	KQTALVELLK	1,HTL_AC_azide#0;	0.00478	1357.81	1357.81	0.00201	1.48	TRUE
	2	KQTALVELLK	1,HTL_AC_azide#0;	0.0048	1357.81	1357.81	0.00137	1.01	TRUE
	2	KQTALVELLK	1,HTL_AC_azide#0;	0.00483	1357.82	1357.81	0.0029	2.13	TRUE
	2	KQTALVELLK	1,HTL_AC_azide#0;	0.005	1357.82	1357.81	0.00315	2.32	TRUE
	2	KQTALVELLK	1,HTL_AC_azide#0;	0.00506	1357.82	1357.81	0.00455	3.35	TRUE
	2	KQTALVELLK	1,HTL_AC_azide#0;	0.00525	1357.82	1357.81	0.00715	5.27	TRUE
	3	KQTALVELLK	1,HTL_AC_azide#0;	0.00555	1357.81	1357.81	0.00102	0.75	TRUE
	3	KQTALVELLK	1,HTL_AC_azide#0;	0.00577	1357.82	1357.81	0.00332	2.45	TRUE
	2	KQTALVELLK	1,HTL_AC_azide#0;	0.00615	1357.82	1357.81	0.00466	3.43	TRUE
	2	KQTALVELLK	1,HTL_AC_azide#0;	0.00635	1357.82	1357.81	0.0028	2.06	TRUE
	3	KQTALVELLK	1,HTL_AC_azide#0;	0.00646	1357.82	1357.81	0.00274	2.02	TRUE
	2	KQTALVELLK	1,HTL_AC_azide#0;	0.00725	1357.82	1357.81	0.00553	4.08	TRUE
	3	KFWGKYLYEIAR	1,HTL_AC_azide#0;	0.00758	1788.95	1788.95	0.00244	1.36	TRUE
	3	KQTALVELLK	1,HTL_AC_azide#0;	0.00777	1357.81	1357.81	0.00259	1.91	TRUE
	2	KQTALVELLK	1,HTL_AC_azide#0;	0.00807	1357.82	1357.81	0.00605	4.45	TRUE
	3	KQTALVELLK	1,HTL_AC_azide#0;	0.00833	1357.82	1357.81	0.00634	4.67	TRUE
	2	KQTALVELLK	1,HTL_AC_azide#0;	0.00893	1357.82	1357.81	0.004	2.95	TRUE
	2	KQTALVELLK	1,HTL_AC_azide#0;	0.00913	1357.82	1357.81	0.00562	4.14	TRUE
	2	KQTALVELLK	1,HTL_AC_azide#0;	0.00951	1357.82	1357.81	0.00588	4.33	TRUE
	2	KQTALVELLK	1,HTL_AC_azide#0;	0.00973	1357.82	1357.81	0.00437	3.21	TRUE
	2	KQTALVELLK	1,HTL_AC_azide#0;	0.01	1357.82	1357.81	0.00701	5.16	TRUE
	2	KQTALVELLK	1,HTL_AC_azide#0;	0.0105	1357.82	1357.81	0.00421	3.1	TRUE
	2	KQTALVELLK	1,HTL_AC_azide#0;	0.0107	1357.82	1357.81	0.00284	2.09	TRUE
	3	KQTALVELLK	1,HTL_AC_azide#0;	0.0115	1357.81	1357.81	0.00193	1.42	TRUE
	2	KQTALVELLK	1,HTL_AC_azide#0;	0.0133	1357.82	1357.81	0.00343	2.52	TRUE
	2	KQTALVELLK	1,HTL_AC_azide#0;	0.0141	1357.81	1357.81	0.00212	1.56	TRUE
	2	KQTALVELLK	1,HTL_AC_azide#0;	0.0168	1357.82	1357.81	0.00405	2.98	TRUE
	2	KQTALVELLK	1,HTL_AC_azide#0;	0.017	1357.82	1357.81	0.00419	3.08	TRUE
	2	KQTALVELLK	1,HTL_AC_azide#0;	0.0203	1357.81	1357.81	0.002	1.48	TRUE
	2	KQTALVELLK	1,HTL_AC_azide#0;	0.0208	1357.82	1357.81	0.0045	3.31	TRUE
	3	KQTALVELLK	1,HTL_AC_azide#0;	0.0209	1357.81	1357.81	0.0013	0.96	TRUE
	2	KQTALVELLK	1,HTL_AC_azide#0;	0.0213	1357.81	1357.81	0.00232	1.71	TRUE
	2	KQTALVELLK	1,HTL_AC_azide#0;	0.0221	1357.81	1357.81	-0.00065	-0.48	TRUE
	2	KQTALVELLK	1,HTL_AC_azide#0;	0.029	1357.82	1357.81	0.00414	3.05	TRUE
	2	KQTALVELLK	1,HTL_AC_azide#0;	0.0459	1357.81	1357.81	0.00097	0.72	TRUE
	2	KQTALVELLK	1,HTL_AC_azide#0;	0.0728	1357.82	1357.81	0.00566	4.17	TRUE
	2	KQTALVELLK	1,HTL_AC_azide#0;	0.0949	1357.82	1357.81	0.00346	2.55	TRUE
	2	KQTALVELLK	1,HTL_AC_azide#0;	0.105	1357.82	1357.81	0.00329	2.42	TRUE
	2	KQTALVELLK	1,HTL_AC_azide#0;	0.118	1357.82	1357.81	0.00337	2.48	TRUE
	2	KQTALVELLK	1,HTL_AC_azide#0;	0.157	1357.82	1357.81	0.00377	2.77	TRUE
	2	KQTALVELLK	1,HTL_AC_azide#0;	0.186	1357.82	1357.81	0.00308	2.27	TRUE
	2	KQTALVELLK	1,HTL_AC_azide#0;	0.196	1357.81	1357.81	0.00093	0.68	TRUE
	2	KQTALVELLK	1,HTL_AC_azide#0;	0.254	1357.81	1357.81	-0.00068	-0.5	TRUE
	3	KQTALVELLK	1,HTL_AC_azide#0;	0.265	1357.81	1357.81	-0.00096	-0.71	TRUE
	3	EYEATLEECCAKDDPHACYSTVFDKLK	10,Carbamidomethyl[C]#0;12,HTL_AC_azide#0;	0.00199	3380.55	3380.48	0.06366	18.83	TRUE
	4	EYEATLEECCAKDDPHACYSTVFDKLK	10,Carbamidomethyl[C]#0;12,HTL_AC_azide#0;	0.0179	3380.52	3380.48	0.04013	11.87	TRUE
	3	LVNELTEFAKTCVADESHAGCEK	10,HTL_AC_azide#0;12,Carbamidomethyl[C]#0;21,Carbamidomethyl[C]#0;	8.53e-10	2823.31	2823.3	0.00855	3.03	TRUE
	3	LVNELTEFAKTCVADESHAGCEK	10,HTL_AC_azide#0;12,Carbamidomethyl[C]#0;21,Carbamidomethyl[C]#0;	2e-09	2823.3	2823.3	0.00467	1.65	TRUE
	3	LVNELTEFAKTCVADESHAGCEK	10,HTL_AC_azide#0;12,Carbamidomethyl[C]#0;21,Carbamidomethyl[C]#0;	3.59e-09	2823.3	2823.3	0.00289	1.02	TRUE
	3	LVNELTEFAKTCVADESHAGCEK	10,HTL_AC_azide#0;12,Carbamidomethyl[C]#0;21,Carbamidomethyl[C]#0;	5.87e-09	2823.3	2823.3	0.00444	1.57	TRUE
	3	LVNELTEFAKTCVADESHAGCEK	10,HTL_AC_azide#0;12,Carbamidomethyl[C]#0;21,Carbamidomethyl[C]#0;	8.96e-09	2823.3	2823.3	0.00434	1.54	TRUE
	2	LVNELTEFAKTCVADESHAGCEK	10,HTL_AC_azide#0;12,Carbamidomethyl[C]#0;21,Carbamidomethyl[C]#0;	4.65e-08	2823.3	2823.3	-0.00064	-0.23	TRUE
	3	LVNELTEFAKTCVADESHAGCEK	10,HTL_AC_azide#0;12,Carbamidomethyl[C]#0;21,Carbamidomethyl[C]#0;	7.99e-08	2823.3	2823.3	0.00321	1.14	TRUE
	4	LVNELTEFAKTCVADESHAGCEK	10,HTL_AC_azide#0;12,Carbamidomethyl[C]#0;21,Carbamidomethyl[C]#0;	2.91e-07	2823.31	2823.3	0.00566	2.01	TRUE
	4	LVNELTEFAKTCVADESHAGCEK	10,HTL_AC_azide#0;12,Carbamidomethyl[C]#0;21,Carbamidomethyl[C]#0;	4.4e-07	2823.31	2823.3	0.00877	3.11	TRUE
	4	LVNELTEFAKTCVADESHAGCEK	10,HTL_AC_azide#0;12,Carbamidomethyl[C]#0;21,Carbamidomethyl[C]#0;	9.89e-07	2823.3	2823.3	0.00506	1.79	TRUE
	3	LVNELTEFAKTCVADESHAGCEK	10,HTL_AC_azide#0;12,Carbamidomethyl[C]#0;21,Carbamidomethyl[C]#0;	3.25e-06	2823.29	2823.3	-0.01183	-4.19	TRUE
	3	LVNELTEFAKTCVADESHAGCEK	10,HTL_AC_azide#0;12,Carbamidomethyl[C]#0;21,Carbamidomethyl[C]#0;	3.71e-06	2823.3	2823.3	0.00214	0.76	TRUE
	4	LVNELTEFAKTCVADESHAGCEK	10,HTL_AC_azide#0;12,Carbamidomethyl[C]#0;21,Carbamidomethyl[C]#0;	5.78e-06	2823.31	2823.3	0.00645	2.28	TRUE
	3	LVNELTEFAKTCVADESHAGCEK	10,HTL_AC_azide#0;12,Carbamidomethyl[C]#0;21,Carbamidomethyl[C]#0;	8.14e-06	2823.31	2823.3	0.00792	2.81	TRUE
	4	LVNELTEFAKTCVADESHAGCEK	10,HTL_AC_azide#0;12,Carbamidomethyl[C]#0;21,Carbamidomethyl[C]#0;	1.14e-05	2823.3	2823.3	0.00327	1.16	TRUE
	3	LVNELTEFAKTCVADESHAGCEK	10,HTL_AC_azide#0;12,Carbamidomethyl[C]#0;21,Carbamidomethyl[C]#0;	2.76e-05	2823.3	2823.3	0.00204	0.72	TRUE
	3	LVNELTEFAKTCVADESHAGCEK	10,HTL_AC_azide#0;12,Carbamidomethyl[C]#0;21,Carbamidomethyl[C]#0;	3.93e-05	2823.27	2823.3	-0.02761	-9.78	TRUE
	4	LVNELTEFAKTCVADESHAGCEK	10,HTL_AC_azide#0;12,Carbamidomethyl[C]#0;21,Carbamidomethyl[C]#0;	5.28e-05	2823.3	2823.3	0.00289	1.02	TRUE
	4	LVNELTEFAKTCVADESHAGCEK	10,HTL_AC_azide#0;12,Carbamidomethyl[C]#0;21,Carbamidomethyl[C]#0;	6.53e-05	2823.3	2823.3	0.00159	0.56	TRUE
	3	LVNELTEFAKTCVADESHAGCEK	10,HTL_AC_azide#0;12,Carbamidomethyl[C]#0;21,Carbamidomethyl[C]#0;	0.000105	2823.3	2823.3	0.00187	0.66	TRUE
	3	LVNELTEFAKTCVADESHAGCEK	10,HTL_AC_azide#0;12,Carbamidomethyl[C]#0;21,Carbamidomethyl[C]#0;	0.000167	2823.31	2823.3	0.00772	2.73	TRUE
	4	LVNELTEFAKTCVADESHAGCEK	10,HTL_AC_azide#0;12,Carbamidomethyl[C]#0;21,Carbamidomethyl[C]#0;	0.000223	2823.31	2823.3	0.00728	2.58	TRUE
	4	LVNELTEFAKTCVADESHAGCEK	10,HTL_AC_azide#0;12,Carbamidomethyl[C]#0;21,Carbamidomethyl[C]#0;	0.000929	2823.31	2823.3	0.00739	2.62	TRUE
	3	LVNELTEFAKTCVADESHAGCEK	10,HTL_AC_azide#0;12,Carbamidomethyl[C]#0;21,Carbamidomethyl[C]#0;	0.00136	2823.31	2823.3	0.01106	3.92	TRUE
	3	LVNELTEFAKTCVADESHAGCEK	10,HTL_AC_azide#0;12,Carbamidomethyl[C]#0;21,Carbamidomethyl[C]#0;	0.00225	2823.31	2823.3	0.00636	2.25	TRUE
	4	DDSPDLPKLKPDPNTLCDEFK	10,HTL_AC_azide#0;17,Carbamidomethyl[C]#0;	0.0829	2659.26	2659.26	0.0007	0.26	TRUE
	3	LVNELTEFAKTCVADESHAGCEK	10,HTL_AC_azide#0;23,HTL_AC_azide#0;	0.404	2924.39	2924.35	0.03471	11.87	TRUE
	2	SLHTLFGDELCKVASLR	11,Carbamidomethyl[C]#0;12,HTL_AC_azide#0;	1.4e-06	2161.12	2161.11	0.00363	1.68	TRUE
	2	SLHTLFGDELCKVASLR	11,Carbamidomethyl[C]#0;12,HTL_AC_azide#0;	2.78e-06	2161.12	2161.11	0.00183	0.85	TRUE
	2	SLHTLFGDELCKVASLR	11,Carbamidomethyl[C]#0;12,HTL_AC_azide#0;	4.08e-06	2161.12	2161.11	0.00723	3.34	TRUE
	3	SLHTLFGDELCKVASLR	11,Carbamidomethyl[C]#0;12,HTL_AC_azide#0;	1.24e-05	2161.12	2161.11	0.0045	2.08	TRUE
	3	SLHTLFGDELCKVASLR	11,Carbamidomethyl[C]#0;12,HTL_AC_azide#0;	1.82e-05	2161.12	2161.11	0.00409	1.89	TRUE
	4	SLHTLFGDELCKVASLR	11,Carbamidomethyl[C]#0;12,HTL_AC_azide#0;	4.28e-05	2161.12	2161.11	0.00486	2.25	TRUE
	4	SLHTLFGDELCKVASLR	11,Carbamidomethyl[C]#0;12,HTL_AC_azide#0;	6.95e-05	2161.12	2161.11	0.00345	1.6	TRUE
	3	SLHTLFGDELCKVASLR	11,Carbamidomethyl[C]#0;12,HTL_AC_azide#0;	7.27e-05	2161.12	2161.11	0.00486	2.25	TRUE
	4	SLHTLFGDELCKVASLR	11,Carbamidomethyl[C]#0;12,HTL_AC_azide#0;	9.57e-05	2161.12	2161.11	0.00526	2.44	TRUE
	4	SLHTLFGDELCKVASLR	11,Carbamidomethyl[C]#0;12,HTL_AC_azide#0;	0.000146	2161.12	2161.11	0.00542	2.51	TRUE
	3	SLHTLFGDELCKVASLR	11,Carbamidomethyl[C]#0;12,HTL_AC_azide#0;	0.000154	2161.12	2161.11	0.00145	0.67	TRUE
	4	SLHTLFGDELCKVASLR	11,Carbamidomethyl[C]#0;12,HTL_AC_azide#0;	0.00033	2161.12	2161.11	0.00573	2.65	TRUE
	4	SLHTLFGDELCKVASLR	11,Carbamidomethyl[C]#0;12,HTL_AC_azide#0;	0.00075	2161.12	2161.11	0.00472	2.18	TRUE
	4	SLHTLFGDELCKVASLR	11,Carbamidomethyl[C]#0;12,HTL_AC_azide#0;	0.000825	2161.12	2161.11	0.00567	2.62	TRUE
	3	SLHTLFGDELCKVASLR	11,Carbamidomethyl[C]#0;12,HTL_AC_azide#0;	0.000934	2161.12	2161.11	0.00531	2.46	TRUE
	4	SLHTLFGDELCKVASLR	11,Carbamidomethyl[C]#0;12,HTL_AC_azide#0;	0.001	2161.12	2161.11	0.00542	2.51	TRUE
	4	SLHTLFGDELCKVASLR	11,Carbamidomethyl[C]#0;12,HTL_AC_azide#0;	0.00151	2161.12	2161.11	0.00527	2.44	TRUE
	4	SLHTLFGDELCKVASLR	11,Carbamidomethyl[C]#0;12,HTL_AC_azide#0;	0.00216	2161.12	2161.11	0.00644	2.98	TRUE
	4	SLHTLFGDELCKVASLR	11,Carbamidomethyl[C]#0;12,HTL_AC_azide#0;	0.00396	2161.12	2161.11	0.00462	2.14	TRUE
	3	SLHTLFGDELCKVASLR	11,Carbamidomethyl[C]#0;12,HTL_AC_azide#0;	0.00509	2161.12	2161.11	0.00361	1.67	TRUE
	3	SLHTLFGDELCKVASLR	11,Carbamidomethyl[C]#0;12,HTL_AC_azide#0;	0.00761	2161.12	2161.11	0.00596	2.76	TRUE
	4	SLHTLFGDELCKVASLR	11,Carbamidomethyl[C]#0;12,HTL_AC_azide#0;	0.0103	2161.12	2161.11	0.00531	2.46	TRUE
	3	SLHTLFGDELCKVASLR	11,Carbamidomethyl[C]#0;12,HTL_AC_azide#0;	0.0118	2161.12	2161.11	0.00405	1.87	TRUE
	4	SLHTLFGDELCKVASLR	11,Carbamidomethyl[C]#0;12,HTL_AC_azide#0;	0.0207	2161.12	2161.11	0.00582	2.69	TRUE
	3	SLHTLFGDELCKVASLR	11,Carbamidomethyl[C]#0;12,HTL_AC_azide#0;	0.0255	2161.12	2161.11	0.00611	2.83	TRUE
	3	SLHTLFGDELCKVASLR	11,Carbamidomethyl[C]#0;12,HTL_AC_azide#0;	0.032	2161.12	2161.11	0.00478	2.21	TRUE
	3	SLHTLFGDELCKVASLR	11,Carbamidomethyl[C]#0;12,HTL_AC_azide#0;	0.0414	2161.12	2161.11	0.00531	2.46	TRUE
	3	SLHTLFGDELCKVASLR	11,Carbamidomethyl[C]#0;12,HTL_AC_azide#0;	0.0516	2161.12	2161.11	0.00417	1.93	TRUE
	4	SLHTLFGDELCKVASLR	11,Carbamidomethyl[C]#0;12,HTL_AC_azide#0;	0.07	2161.12	2161.11	0.00535	2.47	TRUE
	4	SLHTLFGDELCKVASLR	11,Carbamidomethyl[C]#0;12,HTL_AC_azide#0;	0.0804	2161.12	2161.11	0.0046	2.13	TRUE
	4	SLHTLFGDELCKVASLR	11,Carbamidomethyl[C]#0;12,HTL_AC_azide#0;	0.087	2161.12	2161.11	0.00238	1.1	TRUE
	3	SLHTLFGDELCKVASLR	11,Carbamidomethyl[C]#0;12,HTL_AC_azide#0;	0.115	2161.12	2161.11	0.00541	2.5	TRUE
	3	SLHTLFGDELCKVASLR	11,Carbamidomethyl[C]#0;12,HTL_AC_azide#0;	0.132	2161.12	2161.11	0.00349	1.62	TRUE
	3	SLHTLFGDELCKVASLR	11,Carbamidomethyl[C]#0;12,HTL_AC_azide#0;	0.14	2161.12	2161.11	0.00427	1.98	TRUE
	3	SLHTLFGDELCKVASLR	11,Carbamidomethyl[C]#0;12,HTL_AC_azide#0;	0.142	2161.12	2161.11	0.00126	0.58	TRUE
	3	SLHTLFGDELCKVASLR	11,Carbamidomethyl[C]#0;12,HTL_AC_azide#0;	0.162	2161.11	2161.11	0.0002	0.09	TRUE
	3	SLHTLFGDELCKVASLR	11,Carbamidomethyl[C]#0;12,HTL_AC_azide#0;	0.181	2161.12	2161.11	0.00248	1.15	TRUE
	3	SLHTLFGDELCKVASLR	11,Carbamidomethyl[C]#0;12,HTL_AC_azide#0;	0.244	2161.12	2161.11	0.00746	3.45	TRUE
	2	SLHTLFGDELCKVASLR	11,Carbamidomethyl[C]#0;12,HTL_AC_azide#0;	0.26	2161.12	2161.11	0.00203	0.94	TRUE
	3	SLHTLFGDELCKVASLR	11,Carbamidomethyl[C]#0;12,HTL_AC_azide#0;	0.381	2161.11	2161.11	-0.00168	-0.78	TRUE
	2	HLVDEPQNLIKQNCDQFEK	11,HTL_AC_azide#0;14,Carbamidomethyl[C]#0;	2.07e-08	2570.24	2570.24	0.00656	2.55	TRUE
	3	HLVDEPQNLIKQNCDQFEK	11,HTL_AC_azide#0;14,Carbamidomethyl[C]#0;	8.43e-08	2570.24	2570.24	0.00346	1.35	TRUE
	3	HLVDEPQNLIKQNCDQFEK	11,HTL_AC_azide#0;14,Carbamidomethyl[C]#0;	1.6e-07	2570.24	2570.24	0.00502	1.95	TRUE
	2	HLVDEPQNLIKQNCDQFEK	11,HTL_AC_azide#0;14,Carbamidomethyl[C]#0;	3.04e-07	2570.25	2570.24	0.00875	3.41	TRUE
	4	HLVDEPQNLIKQNCDQFEK	11,HTL_AC_azide#0;14,Carbamidomethyl[C]#0;	3.69e-06	2570.24	2570.24	0.0073	2.84	TRUE
	3	HLVDEPQNLIKQNCDQFEK	11,HTL_AC_azide#0;14,Carbamidomethyl[C]#0;	6.68e-06	2570.23	2570.24	-0.00305	-1.19	TRUE
	3	HLVDEPQNLIKQNCDQFEK	11,HTL_AC_azide#0;14,Carbamidomethyl[C]#0;	1.31e-05	2570.23	2570.24	-0.00408	-1.59	TRUE
	4	HLVDEPQNLIKQNCDQFEK	11,HTL_AC_azide#0;14,Carbamidomethyl[C]#0;	2.11e-05	2570.24	2570.24	0.00533	2.07	TRUE
	3	HLVDEPQNLIKQNCDQFEK	11,HTL_AC_azide#0;14,Carbamidomethyl[C]#0;	2.2e-05	2570.23	2570.24	-0.00327	-1.27	TRUE
	3	HLVDEPQNLIKQNCDQFEK	11,HTL_AC_azide#0;14,Carbamidomethyl[C]#0;	4.82e-05	2570.24	2570.24	-0.00221	-0.86	TRUE
	3	HLVDEPQNLIKQNCDQFEK	11,HTL_AC_azide#0;14,Carbamidomethyl[C]#0;	7.18e-05	2570.24	2570.24	0.00485	1.89	TRUE
	3	HLVDEPQNLIKQNCDQFEK	11,HTL_AC_azide#0;14,Carbamidomethyl[C]#0;	0.000106	2570.23	2570.24	-0.00352	-1.37	TRUE
	3	HLVDEPQNLIKQNCDQFEK	11,HTL_AC_azide#0;14,Carbamidomethyl[C]#0;	0.000141	2570.23	2570.24	-0.00998	-3.88	TRUE
	3	HLVDEPQNLIKQNCDQFEK	11,HTL_AC_azide#0;14,Carbamidomethyl[C]#0;	0.000367	2570.24	2570.24	0.00578	2.25	TRUE
	3	HLVDEPQNLIKQNCDQFEK	11,HTL_AC_azide#0;14,Carbamidomethyl[C]#0;	0.000381	2570.23	2570.24	-0.00383	-1.49	TRUE
	3	TVMENFVAFVDKCCAADDKEACFAVEGPK	12,HTL_AC_azide#0;	0.00511	3352.5	3352.51	-0.00735	-2.19	TRUE
	3	TVMENFVAFVDKCCAADDK	12,HTL_AC_azide#0;	0.236	2321.07	2321.03	0.03322	14.31	TRUE
	2	SLHTLFGDELCK	12,HTL_AC_azide#0;	0.238	1577.8	1577.77	0.03102	19.66	TRUE
	3	TVMENFVAFVDKCCAADDK	12,HTL_AC_azide#0;13,Carbamidomethyl[C]#0;14,Carbamidomethyl[C]#0;	3.75e-06	2435.08	2435.07	0.00242	0.99	TRUE
	3	TVMENFVAFVDKCCAADDK	12,HTL_AC_azide#0;13,Carbamidomethyl[C]#0;14,Carbamidomethyl[C]#0;	6.16e-05	2435.08	2435.07	0.00294	1.21	TRUE
	4	TVMENFVAFVDKCCAADDKEACFAVEGPK	12,HTL_AC_azide#0;14,Carbamidomethyl[C]#0;19,HTL_AC_azide#0;	0.00884	3624.66	3624.63	0.03798	10.48	TRUE
	4	TVMENFVAFVDKCCAADDKEACFAVEGPK	12,HTL_AC_azide#0;14,Carbamidomethyl[C]#0;19,HTL_AC_azide#0;	0.391	3624.66	3624.63	0.03599	9.93	TRUE
	4	TVMENFVAFVDKCCAADDKEACFAVEGPK	12,HTL_AC_azide#0;14,Carbamidomethyl[C]#0;22,Carbamidomethyl[C]#0;	2.65e-06	3466.57	3466.55	0.01763	5.09	TRUE
	3	TVMENFVAFVDKCCAADDKEACFAVEGPK	12,HTL_AC_azide#0;14,Carbamidomethyl[C]#0;22,Carbamidomethyl[C]#0;	0.000837	3466.56	3466.55	0.01537	4.43	TRUE
	3	TVMENFVAFVDKCCAADDKEACFAVEGPK	12,HTL_AC_azide#0;14,Carbamidomethyl[C]#0;22,Carbamidomethyl[C]#0;	0.00173	3466.58	3466.55	0.03284	9.47	TRUE
	4	TVMENFVAFVDKCCAADDKEACFAVEGPK	12,HTL_AC_azide#0;14,Carbamidomethyl[C]#0;22,Carbamidomethyl[C]#0;	0.0206	3466.59	3466.55	0.03801	10.96	TRUE
	4	TVMENFVAFVDKCCAADDKEACFAVEGPK	12,HTL_AC_azide#0;14,Carbamidomethyl[C]#0;22,Carbamidomethyl[C]#0;	0.151	3466.61	3466.55	0.06001	17.31	TRUE
	3	EYEATLEECCAKDDPHACYSTVFDK	12,HTL_AC_azide#0;18,Carbamidomethyl[C]#0;	1.2e-05	3139.34	3139.3	0.03854	12.28	TRUE
	3	EYEATLEECCAKDDPHACYSTVFDK	12,HTL_AC_azide#0;18,Carbamidomethyl[C]#0;	2.35e-05	3139.35	3139.3	0.04859	15.48	TRUE
	2	EYEATLEECCAKDDPHACYSTVFDK	12,HTL_AC_azide#0;18,Carbamidomethyl[C]#0;	0.000189	3139.36	3139.3	0.05476	17.44	TRUE
	3	EYEATLEECCAKDDPHACYSTVFDK	12,HTL_AC_azide#0;18,Carbamidomethyl[C]#0;	0.000735	3139.35	3139.3	0.04904	15.62	TRUE
	3	EYEATLEECCAKDDPHACYSTVFDK	12,HTL_AC_azide#0;18,Carbamidomethyl[C]#0;	0.000748	3139.35	3139.3	0.04499	14.33	TRUE
	4	EYEATLEECCAKDDPHACYSTVFDK	12,HTL_AC_azide#0;18,Carbamidomethyl[C]#0;	0.00138	3139.34	3139.3	0.03415	10.88	TRUE
	3	EYEATLEECCAKDDPHACYSTVFDK	12,HTL_AC_azide#0;18,Carbamidomethyl[C]#0;	0.00178	3139.36	3139.3	0.05605	17.85	TRUE
	4	EYEATLEECCAKDDPHACYSTVFDK	12,HTL_AC_azide#0;18,Carbamidomethyl[C]#0;	0.00242	3139.33	3139.3	0.02837	9.04	TRUE
	4	EYEATLEECCAKDDPHACYSTVFDK	12,HTL_AC_azide#0;18,Carbamidomethyl[C]#0;	0.00505	3139.34	3139.3	0.04	12.74	TRUE
	3	EYEATLEECCAKDDPHACYSTVFDK	12,HTL_AC_azide#0;18,Carbamidomethyl[C]#0;	0.00734	3139.35	3139.3	0.04426	14.1	TRUE
	3	EYEATLEECCAKDDPHACYSTVFDK	12,HTL_AC_azide#0;18,Carbamidomethyl[C]#0;	0.00917	3139.34	3139.3	0.03693	11.76	TRUE
	3	EYEATLEECCAKDDPHACYSTVFDK	12,HTL_AC_azide#0;18,Carbamidomethyl[C]#0;	0.0105	3139.34	3139.3	0.03983	12.69	TRUE
	3	EYEATLEECCAKDDPHACYSTVFDK	12,HTL_AC_azide#0;18,Carbamidomethyl[C]#0;	0.0117	3139.35	3139.3	0.04234	13.49	TRUE
	4	EYEATLEECCAKDDPHACYSTVFDKLK	12,HTL_AC_azide#0;18,Carbamidomethyl[C]#0;	0.0275	3380.52	3380.48	0.03967	11.74	TRUE
	3	EYEATLEECCAKDDPHACYSTVFDK	12,HTL_AC_azide#0;18,Carbamidomethyl[C]#0;	0.0342	3139.34	3139.3	0.03551	11.31	TRUE
	4	EYEATLEECCAKDDPHACYSTVFDKLK	12,HTL_AC_azide#0;18,Carbamidomethyl[C]#0;	0.0447	3380.52	3380.48	0.03967	11.74	TRUE
	4	EYEATLEECCAKDDPHACYSTVFDK	12,HTL_AC_azide#0;18,Carbamidomethyl[C]#0;	0.0473	3139.35	3139.3	0.04476	14.26	TRUE
	3	EYEATLEECCAKDDPHACYSTVFDK	12,HTL_AC_azide#0;18,Carbamidomethyl[C]#0;	0.048	3139.35	3139.3	0.04157	13.24	TRUE
	3	EYEATLEECCAKDDPHACYSTVFDK	12,HTL_AC_azide#0;18,Carbamidomethyl[C]#0;	0.137	3139.35	3139.3	0.05095	16.23	TRUE
	3	EYEATLEECCAKDDPHACYSTVFDK	12,HTL_AC_azide#0;18,Carbamidomethyl[C]#0;	0.313	3139.34	3139.3	0.04055	12.92	TRUE
	4	TVMENFVAFVDKCCAADDKEACFAVEGPK	12,HTL_AC_azide#0;19,HTL_AC_azide#0;22,Carbamidomethyl[C]#0;	0.000577	3624.66	3624.63	0.03511	9.69	TRUE
	4	TVMENFVAFVDKCCAADDKEACFAVEGPK	12,HTL_AC_azide#0;19,HTL_AC_azide#0;22,Carbamidomethyl[C]#0;	0.00268	3624.66	3624.63	0.03185	8.79	TRUE
	4	TVMENFVAFVDKCCAADDKEACFAVEGPK	12,HTL_AC_azide#0;19,HTL_AC_azide#0;22,Carbamidomethyl[C]#0;	0.00297	3624.66	3624.63	0.03157	8.71	TRUE
	4	TVMENFVAFVDKCCAADDKEACFAVEGPK	12,HTL_AC_azide#0;19,HTL_AC_azide#0;22,Carbamidomethyl[C]#0;	0.00428	3624.66	3624.63	0.0346	9.55	TRUE
	3	TVMENFVAFVDKCCAADDKEACFAVEGPK	12,HTL_AC_azide#0;22,Carbamidomethyl[C]#0;	2.72e-06	3409.57	3409.53	0.03902	11.44	TRUE
	3	TVMENFVAFVDKCCAADDKEACFAVEGPK	12,HTL_AC_azide#0;22,Carbamidomethyl[C]#0;	3.47e-06	3409.57	3409.53	0.04413	12.94	TRUE
	3	TVMENFVAFVDKCCAADDKEACFAVEGPK	12,HTL_AC_azide#0;22,Carbamidomethyl[C]#0;	3.48e-06	3409.57	3409.53	0.04113	12.06	TRUE
	3	TVMENFVAFVDKCCAADDKEACFAVEGPK	12,HTL_AC_azide#0;22,Carbamidomethyl[C]#0;	4.53e-06	3409.58	3409.53	0.04849	14.22	TRUE
	3	TVMENFVAFVDKCCAADDKEACFAVEGPK	12,HTL_AC_azide#0;22,Carbamidomethyl[C]#0;	3.11e-05	3409.58	3409.53	0.05131	15.05	TRUE
	3	TVMENFVAFVDKCCAADDKEACFAVEGPK	12,HTL_AC_azide#0;22,Carbamidomethyl[C]#0;	5.16e-05	3409.57	3409.53	0.03885	11.39	TRUE
	4	TVMENFVAFVDKCCAADDKEACFAVEGPK	12,HTL_AC_azide#0;22,Carbamidomethyl[C]#0;	0.000109	3409.56	3409.53	0.03659	10.73	TRUE
	3	TVMENFVAFVDKCCAADDKEACFAVEGPK	12,HTL_AC_azide#0;22,Carbamidomethyl[C]#0;	0.000122	3409.57	3409.53	0.03893	11.42	TRUE
	4	TVMENFVAFVDKCCAADDKEACFAVEGPK	12,HTL_AC_azide#0;22,Carbamidomethyl[C]#0;	0.000128	3409.57	3409.53	0.03783	11.09	TRUE
	3	TVMENFVAFVDKCCAADDKEACFAVEGPK	12,HTL_AC_azide#0;22,Carbamidomethyl[C]#0;	0.000137	3409.57	3409.53	0.03738	10.96	TRUE
	4	TVMENFVAFVDKCCAADDKEACFAVEGPK	12,HTL_AC_azide#0;22,Carbamidomethyl[C]#0;	0.000157	3409.57	3409.53	0.03998	11.73	TRUE
	4	TVMENFVAFVDKCCAADDKEACFAVEGPK	12,HTL_AC_azide#0;22,Carbamidomethyl[C]#0;	0.000322	3409.56	3409.53	0.03288	9.64	TRUE
	4	TVMENFVAFVDKCCAADDKEACFAVEGPK	12,HTL_AC_azide#0;22,Carbamidomethyl[C]#0;	0.000333	3409.57	3409.53	0.0437	12.82	TRUE
	4	TVMENFVAFVDKCCAADDKEACFAVEGPK	12,HTL_AC_azide#0;22,Carbamidomethyl[C]#0;	0.000474	3409.57	3409.53	0.03743	10.98	TRUE
	4	TVMENFVAFVDKCCAADDKEACFAVEGPK	12,HTL_AC_azide#0;22,Carbamidomethyl[C]#0;	0.000779	3409.58	3409.53	0.04747	13.92	TRUE
	3	TVMENFVAFVDKCCAADDKEACFAVEGPK	12,HTL_AC_azide#0;22,Carbamidomethyl[C]#0;	0.00157	3409.57	3409.53	0.0395	11.58	TRUE
	4	TVMENFVAFVDKCCAADDKEACFAVEGPK	12,HTL_AC_azide#0;22,Carbamidomethyl[C]#0;	0.00204	3409.57	3409.53	0.04241	12.44	TRUE
	4	TVMENFVAFVDKCCAADDKEACFAVEGPK	12,HTL_AC_azide#0;22,Carbamidomethyl[C]#0;	0.0022	3409.57	3409.53	0.04263	12.5	TRUE
	4	TVMENFVAFVDKCCAADDKEACFAVEGPK	12,HTL_AC_azide#0;22,Carbamidomethyl[C]#0;	0.00329	3409.57	3409.53	0.04233	12.42	TRUE
	4	TVMENFVAFVDKCCAADDKEACFAVEGPK	12,HTL_AC_azide#0;22,Carbamidomethyl[C]#0;	0.00378	3409.58	3409.53	0.04906	14.39	TRUE
	3	TVMENFVAFVDKCCAADDKEACFAVEGPK	12,HTL_AC_azide#0;22,Carbamidomethyl[C]#0;	0.00465	3409.58	3409.53	0.04755	13.95	TRUE
	4	TVMENFVAFVDKCCAADDKEACFAVEGPK	12,HTL_AC_azide#0;22,Carbamidomethyl[C]#0;	0.00534	3409.57	3409.53	0.0394	11.55	TRUE
	4	TVMENFVAFVDKCCAADDKEACFAVEGPK	12,HTL_AC_azide#0;22,Carbamidomethyl[C]#0;	0.00602	3409.57	3409.53	0.03891	11.41	TRUE
	4	TVMENFVAFVDKCCAADDKEACFAVEGPK	12,HTL_AC_azide#0;22,Carbamidomethyl[C]#0;	0.00803	3409.58	3409.53	0.05007	14.69	TRUE
	3	TVMENFVAFVDKCCAADDKEACFAVEGPK	12,HTL_AC_azide#0;22,Carbamidomethyl[C]#0;	0.0105	3409.56	3409.53	0.03545	10.4	TRUE
	3	TVMENFVAFVDKCCAADDKEACFAVEGPK	12,HTL_AC_azide#0;22,Carbamidomethyl[C]#0;	0.0197	3409.58	3409.53	0.04882	14.32	TRUE
	3	TVMENFVAFVDKCCAADDKEACFAVEGPK	12,HTL_AC_azide#0;22,Carbamidomethyl[C]#0;	0.0586	3409.57	3409.53	0.04141	12.15	TRUE
	4	TVMENFVAFVDKCCAADDKEACFAVEGPK	12,HTL_AC_azide#0;22,Carbamidomethyl[C]#0;	0.0781	3409.56	3409.53	0.03167	9.29	TRUE
	4	TVMENFVAFVDKCCAADDKEACFAVEGPK	12,HTL_AC_azide#0;22,Carbamidomethyl[C]#0;	0.12	3409.56	3409.53	0.03432	10.07	TRUE
	4	TVMENFVAFVDKCCAADDKEACFAVEGPK	12,HTL_AC_azide#0;22,Carbamidomethyl[C]#0;	0.209	3409.57	3409.53	0.04082	11.97	TRUE
	2	TCVADESHAGCEK	13,HTL_AC_azide#0;	0.0735	1564.67	1564.64	0.03065	19.59	TRUE
	4	LKHLVDEPQNLIKQNCDQFEK	13,HTL_AC_azide#0;16,Carbamidomethyl[C]#0;	0.000139	2811.42	2811.42	0.00675	2.4	TRUE
	3	LKHLVDEPQNLIKQNCDQFEK	13,HTL_AC_azide#0;16,Carbamidomethyl[C]#0;	0.00166	2811.43	2811.42	0.01132	4.03	TRUE
	3	TCVADESHAGCEKSLHTLFGDELCK	13,HTL_AC_azide#0;24,Carbamidomethyl[C]#0;	0.0758	2965.36	2965.32	0.03829	12.91	TRUE
	4	AFDEKLFTFHADICTLPDTEKQIK	14,Carbamidomethyl[C]#0;21,HTL_AC_azide#0;	0.00582	3082.54	3082.53	0.01094	3.55	TRUE
	3	YNGVFQECCQAEDKGACLLPK	14,HTL_AC_azide#0;	0.179	2531.18	2531.14	0.03677	14.53	TRUE
	2	YNGVFQECCQAEDKGACLLPK	14,HTL_AC_azide#0;17,Carbamidomethyl[C]#0;	0.00529	2588.2	2588.17	0.03595	13.89	TRUE
	2	YNGVFQECCQAEDKGACLLPK	14,HTL_AC_azide#0;17,Carbamidomethyl[C]#0;	0.02	2588.2	2588.17	0.03161	12.21	TRUE
	3	YNGVFQECCQAEDKGACLLPK	14,HTL_AC_azide#0;17,Carbamidomethyl[C]#0;	0.0431	2588.2	2588.17	0.0302	11.67	TRUE
	2	YNGVFQECCQAEDKGACLLPK	14,HTL_AC_azide#0;17,Carbamidomethyl[C]#0;	0.0494	2588.2	2588.17	0.03422	13.22	TRUE
	3	YNGVFQECCQAEDKGACLLPK	14,HTL_AC_azide#0;17,Carbamidomethyl[C]#0;	0.0536	2588.2	2588.17	0.03383	13.07	TRUE
	3	YNGVFQECCQAEDKGACLLPK	14,HTL_AC_azide#0;17,Carbamidomethyl[C]#0;	0.0547	2588.19	2588.17	0.02691	10.4	TRUE
	3	YNGVFQECCQAEDKGACLLPK	14,HTL_AC_azide#0;17,Carbamidomethyl[C]#0;	0.0564	2588.2	2588.17	0.03018	11.66	TRUE
	2	YNGVFQECCQAEDKGACLLPK	14,HTL_AC_azide#0;17,Carbamidomethyl[C]#0;	0.315	2588.2	2588.17	0.03183	12.3	TRUE
	4	YNGVFQECCQAEDKGACLLPKIETMR	14,HTL_AC_azide#0;17,Carbamidomethyl[C]#0;21,HTL_AC_azide#0;	0.157	3433.62	3433.58	0.04253	12.39	TRUE
	3	YNGVFQECCQAEDKGACLLPKIETMR	14,HTL_AC_azide#0;17,Carbamidomethyl[C]#0;21,HTL_AC_azide#0;	0.236	3433.62	3433.58	0.04027	11.73	TRUE
	3	YNGVFQECCQAEDKGACLLPKIETMR	14,HTL_AC_azide#0;21,HTL_AC_azide#0;	0.092	3376.54	3376.56	-0.01761	-5.21	TRUE
	3	YNGVFQECCQAEDKGACLLPKIETMR	14,HTL_AC_azide#0;21,HTL_AC_azide#0;	0.193	3376.54	3376.56	-0.0182	-5.39	TRUE
	3	YNGVFQECCQAEDKGACLLPKIETMR	14,HTL_AC_azide#0;21,HTL_AC_azide#0;25,Oxidation[M]#0;	0.147	3392.54	3392.55	-0.01489	-4.39	TRUE
	4	HPYFYAPELLYYANKYNGVFQECCQAEDK	15,HTL_AC_azide#0;	0.016	3718.71	3718.67	0.04142	11.14	TRUE
	3	HPYFYAPELLYYANKYNGVFQECCQAEDK	15,HTL_AC_azide#0;	0.18	3718.7	3718.67	0.03362	9.04	TRUE
	3	LAKEYEATLEECCAKDDPHACYSTVFDK	15,HTL_AC_azide#0;	0.214	3394.46	3394.5	-0.04334	-12.77	TRUE
	3	LAKEYEATLEECCAKDDPHACYSTVFDK	15,HTL_AC_azide#0;21,Carbamidomethyl[C]#0;	0.000103	3451.51	3451.52	-0.0091	-2.64	TRUE
	4	HPYFYAPELLYYANKYNGVFQECCQAEDK	15,HTL_AC_azide#0;23,Carbamidomethyl[C]#0;24,Carbamidomethyl[C]#0;	6.92e-10	3832.72	3832.71	0.00345	0.9	TRUE
	3	HPYFYAPELLYYANKYNGVFQECCQAEDK	15,HTL_AC_azide#0;23,Carbamidomethyl[C]#0;24,Carbamidomethyl[C]#0;	8.37e-10	3832.72	3832.71	0.00891	2.32	TRUE
	4	HPYFYAPELLYYANKYNGVFQECCQAEDK	15,HTL_AC_azide#0;23,Carbamidomethyl[C]#0;24,Carbamidomethyl[C]#0;	2.46e-09	3832.72	3832.71	0.0065	1.7	TRUE
	4	HPYFYAPELLYYANKYNGVFQECCQAEDK	15,HTL_AC_azide#0;23,Carbamidomethyl[C]#0;24,Carbamidomethyl[C]#0;	2.49e-09	3832.72	3832.71	0.00507	1.32	TRUE
	3	HPYFYAPELLYYANKYNGVFQECCQAEDK	15,HTL_AC_azide#0;23,Carbamidomethyl[C]#0;24,Carbamidomethyl[C]#0;	5.19e-09	3832.72	3832.71	0.00975	2.54	TRUE
	4	HPYFYAPELLYYANKYNGVFQECCQAEDK	15,HTL_AC_azide#0;23,Carbamidomethyl[C]#0;24,Carbamidomethyl[C]#0;	1.27e-07	3832.72	3832.71	0.00675	1.76	TRUE
	4	HPYFYAPELLYYANKYNGVFQECCQAEDK	15,HTL_AC_azide#0;23,Carbamidomethyl[C]#0;24,Carbamidomethyl[C]#0;	2.17e-06	3832.72	3832.71	0.00558	1.46	TRUE
	3	HPYFYAPELLYYANKYNGVFQECCQAEDK	15,HTL_AC_azide#0;23,Carbamidomethyl[C]#0;24,Carbamidomethyl[C]#0;	4.65e-06	3832.72	3832.71	0.00795	2.08	TRUE
	4	HPYFYAPELLYYANKYNGVFQECCQAEDK	15,HTL_AC_azide#0;23,Carbamidomethyl[C]#0;24,Carbamidomethyl[C]#0;	9.37e-06	3832.71	3832.71	2e-05	0	TRUE
	4	HPYFYAPELLYYANKYNGVFQECCQAEDK	15,HTL_AC_azide#0;23,Carbamidomethyl[C]#0;24,Carbamidomethyl[C]#0;	1.13e-05	3832.72	3832.71	0.00478	1.25	TRUE
	4	HPYFYAPELLYYANKYNGVFQECCQAEDK	15,HTL_AC_azide#0;23,Carbamidomethyl[C]#0;24,Carbamidomethyl[C]#0;	0.000313	3832.71	3832.71	0.0025	0.65	TRUE
	4	HPYFYAPELLYYANKYNGVFQECCQAEDK	15,HTL_AC_azide#0;23,Carbamidomethyl[C]#0;24,Carbamidomethyl[C]#0;	0.00052	3832.71	3832.71	0.00126	0.33	TRUE
	4	HPYFYAPELLYYANKYNGVFQECCQAEDK	15,HTL_AC_azide#0;23,Carbamidomethyl[C]#0;24,Carbamidomethyl[C]#0;	0.00207	3832.72	3832.71	0.00448	1.17	TRUE
	4	HPYFYAPELLYYANKYNGVFQECCQAEDK	15,HTL_AC_azide#0;23,Carbamidomethyl[C]#0;24,Carbamidomethyl[C]#0;	0.00245	3832.72	3832.71	0.00704	1.84	TRUE
	4	HPYFYAPELLYYANKYNGVFQECCQAEDK	15,HTL_AC_azide#0;23,Carbamidomethyl[C]#0;24,Carbamidomethyl[C]#0;	0.00679	3832.71	3832.71	0.00071	0.19	TRUE
	5	HPYFYAPELLYYANKYNGVFQECCQAEDK	15,HTL_AC_azide#0;23,Carbamidomethyl[C]#0;24,Carbamidomethyl[C]#0;	0.017	3832.73	3832.71	0.01887	4.92	TRUE
	4	HPYFYAPELLYYANKYNGVFQECCQAEDK	15,HTL_AC_azide#0;24,Carbamidomethyl[C]#0;	0.126	3775.71	3775.69	0.01644	4.35	TRUE
	4	PCFSALTPDETYVPKAFDEKLFTFHADICTLPDTEK	15,HTL_AC_azide#0;29,Carbamidomethyl[C]#0;	0.092	4362.11	4362.07	0.03617	8.29	TRUE
	5	PCFSALTPDETYVPKAFDEKLFTFHADICTLPDTEK	15,HTL_AC_azide#0;29,Carbamidomethyl[C]#0;	0.111	4362.11	4362.07	0.03883	8.9	TRUE
	4	HPYFYAPELLYYANKYNGVFQECCQAEDKGACLLPK	15,HTL_AC_azide#0;29,HTL_AC_azide#0;	0.251	4616.18	4616.15	0.02995	6.49	TRUE
	4	HPYFYAPELLYYANKYNGVFQECCQAEDK	15,HTL_AC_azide#0;29,HTL_AC_azide#0;	0.406	3933.79	3933.77	0.02585	6.57	TRUE
	5	HPYFYAPELLYYANKYNGVFQECCQAEDKGACLLPK	15,HTL_AC_azide#0;29,HTL_AC_azide#0;32,Carbamidomethyl[C]#0;	0.0246	4673.21	4673.17	0.04135	8.85	TRUE
	5	HPYFYAPELLYYANKYNGVFQECCQAEDKGACLLPK	15,HTL_AC_azide#0;32,Carbamidomethyl[C]#0;	0.00109	4458.11	4458.07	0.03418	7.67	TRUE
	4	HPYFYAPELLYYANKYNGVFQECCQAEDKGACLLPK	15,HTL_AC_azide#0;32,Carbamidomethyl[C]#0;	0.00172	4458.11	4458.07	0.0396	8.88	TRUE
	4	HPYFYAPELLYYANKYNGVFQECCQAEDKGACLLPK	15,HTL_AC_azide#0;32,Carbamidomethyl[C]#0;	0.0422	4458.11	4458.07	0.0396	8.88	TRUE
	4	RHPYFYAPELLYYANKYNGVFQECCQAEDK	16,HTL_AC_azide#0;	4.71e-05	3874.83	3874.77	0.05991	15.46	TRUE
	5	RHPYFYAPELLYYANKYNGVFQECCQAEDK	16,HTL_AC_azide#0;	0.000169	3874.81	3874.77	0.03904	10.08	TRUE
	5	RHPYFYAPELLYYANKYNGVFQECCQAEDK	16,HTL_AC_azide#0;	0.000195	3874.81	3874.77	0.04116	10.62	TRUE
	3	RHPYFYAPELLYYANKYNGVFQECCQAEDK	16,HTL_AC_azide#0;	0.000292	3874.82	3874.77	0.05469	14.12	TRUE
	5	RHPYFYAPELLYYANKYNGVFQECCQAEDK	16,HTL_AC_azide#0;	0.246	3874.81	3874.77	0.0396	10.22	TRUE
	3	LFTFHADICTLPDTEKQIK	16,HTL_AC_azide#0;	0.293	2435.28	2435.23	0.04727	19.41	TRUE
	3	LFTFHADICTLPDTEKQIKK	16,HTL_AC_azide#0;	0.363	2563.38	2563.33	0.04869	18.99	TRUE
	3	LFTFHADICTLPDTEKQIK	16,HTL_AC_azide#0;19,HTL_AC_azide#0;	0.0564	2650.36	2650.33	0.02819	10.63	TRUE
	4	RHPYFYAPELLYYANKYNGVFQECCQAEDK	16,HTL_AC_azide#0;24,Carbamidomethyl[C]#0;	2.05e-05	3931.8	3931.79	0.01166	2.97	TRUE
	3	RHPYFYAPELLYYANKYNGVFQECCQAEDK	16,HTL_AC_azide#0;24,Carbamidomethyl[C]#0;25,Carbamidomethyl[C]#0;	1.98e-12	3988.83	3988.81	0.01388	3.48	TRUE
	3	RHPYFYAPELLYYANKYNGVFQECCQAEDK	16,HTL_AC_azide#0;24,Carbamidomethyl[C]#0;25,Carbamidomethyl[C]#0;	3.9e-12	3988.83	3988.81	0.01484	3.72	TRUE
	3	RHPYFYAPELLYYANKYNGVFQECCQAEDK	16,HTL_AC_azide#0;24,Carbamidomethyl[C]#0;25,Carbamidomethyl[C]#0;	4.77e-12	3988.83	3988.81	0.01267	3.18	TRUE
	4	RHPYFYAPELLYYANKYNGVFQECCQAEDK	16,HTL_AC_azide#0;24,Carbamidomethyl[C]#0;25,Carbamidomethyl[C]#0;	6.51e-12	3988.82	3988.81	0.0106	2.66	TRUE
	4	RHPYFYAPELLYYANKYNGVFQECCQAEDK	16,HTL_AC_azide#0;24,Carbamidomethyl[C]#0;25,Carbamidomethyl[C]#0;	7.91e-12	3988.82	3988.81	0.0096	2.41	TRUE
	4	RHPYFYAPELLYYANKYNGVFQECCQAEDK	16,HTL_AC_azide#0;24,Carbamidomethyl[C]#0;25,Carbamidomethyl[C]#0;	1.41e-11	3988.82	3988.81	0.00961	2.41	TRUE
	4	RHPYFYAPELLYYANKYNGVFQECCQAEDK	16,HTL_AC_azide#0;24,Carbamidomethyl[C]#0;25,Carbamidomethyl[C]#0;	2.05e-11	3988.83	3988.81	0.01318	3.31	TRUE
	3	RHPYFYAPELLYYANKYNGVFQECCQAEDK	16,HTL_AC_azide#0;24,Carbamidomethyl[C]#0;25,Carbamidomethyl[C]#0;	2.83e-11	3988.82	3988.81	0.01073	2.69	TRUE
	3	RHPYFYAPELLYYANKYNGVFQECCQAEDK	16,HTL_AC_azide#0;24,Carbamidomethyl[C]#0;25,Carbamidomethyl[C]#0;	3.36e-11	3988.83	3988.81	0.01338	3.35	TRUE
	4	RHPYFYAPELLYYANKYNGVFQECCQAEDK	16,HTL_AC_azide#0;24,Carbamidomethyl[C]#0;25,Carbamidomethyl[C]#0;	6.56e-11	3988.82	3988.81	0.01121	2.81	TRUE
	4	RHPYFYAPELLYYANKYNGVFQECCQAEDK	16,HTL_AC_azide#0;24,Carbamidomethyl[C]#0;25,Carbamidomethyl[C]#0;	7.98e-11	3988.82	3988.81	0.00982	2.46	TRUE
	5	RHPYFYAPELLYYANKYNGVFQECCQAEDK	16,HTL_AC_azide#0;24,Carbamidomethyl[C]#0;25,Carbamidomethyl[C]#0;	1.4e-10	3988.83	3988.81	0.01218	3.05	TRUE
	4	RHPYFYAPELLYYANKYNGVFQECCQAEDK	16,HTL_AC_azide#0;24,Carbamidomethyl[C]#0;25,Carbamidomethyl[C]#0;	1.66e-10	3988.83	3988.81	0.01583	3.97	TRUE
	5	RHPYFYAPELLYYANKYNGVFQECCQAEDK	16,HTL_AC_azide#0;24,Carbamidomethyl[C]#0;25,Carbamidomethyl[C]#0;	2.89e-10	3988.83	3988.81	0.01372	3.44	TRUE
	4	RHPYFYAPELLYYANKYNGVFQECCQAEDK	16,HTL_AC_azide#0;24,Carbamidomethyl[C]#0;25,Carbamidomethyl[C]#0;	8.82e-10	3988.82	3988.81	0.01038	2.6	TRUE
	4	RHPYFYAPELLYYANKYNGVFQECCQAEDK	16,HTL_AC_azide#0;24,Carbamidomethyl[C]#0;25,Carbamidomethyl[C]#0;	8.99e-10	3988.82	3988.81	0.01095	2.74	TRUE
	4	RHPYFYAPELLYYANKYNGVFQECCQAEDK	16,HTL_AC_azide#0;24,Carbamidomethyl[C]#0;25,Carbamidomethyl[C]#0;	1.19e-09	3988.82	3988.81	0.00985	2.47	TRUE
	4	RHPYFYAPELLYYANKYNGVFQECCQAEDK	16,HTL_AC_azide#0;24,Carbamidomethyl[C]#0;25,Carbamidomethyl[C]#0;	1.86e-09	3988.82	3988.81	0.00288	0.72	TRUE
	5	RHPYFYAPELLYYANKYNGVFQECCQAEDK	16,HTL_AC_azide#0;24,Carbamidomethyl[C]#0;25,Carbamidomethyl[C]#0;	2e-09	3988.83	3988.81	0.01828	4.58	TRUE
	5	RHPYFYAPELLYYANKYNGVFQECCQAEDK	16,HTL_AC_azide#0;24,Carbamidomethyl[C]#0;25,Carbamidomethyl[C]#0;	2.59e-09	3988.82	3988.81	0.01009	2.53	TRUE
	5	RHPYFYAPELLYYANKYNGVFQECCQAEDK	16,HTL_AC_azide#0;24,Carbamidomethyl[C]#0;25,Carbamidomethyl[C]#0;	2.64e-09	3988.83	3988.81	0.0141	3.54	TRUE
	4	RHPYFYAPELLYYANKYNGVFQECCQAEDK	16,HTL_AC_azide#0;24,Carbamidomethyl[C]#0;25,Carbamidomethyl[C]#0;	2.92e-09	3988.82	3988.81	0.0082	2.06	TRUE
	5	RHPYFYAPELLYYANKYNGVFQECCQAEDK	16,HTL_AC_azide#0;24,Carbamidomethyl[C]#0;25,Carbamidomethyl[C]#0;	5.22e-09	3988.82	3988.81	0.00605	1.52	TRUE
	4	RHPYFYAPELLYYANKYNGVFQECCQAEDK	16,HTL_AC_azide#0;24,Carbamidomethyl[C]#0;25,Carbamidomethyl[C]#0;	5.49e-09	3988.83	3988.81	0.01436	3.6	TRUE
	4	RHPYFYAPELLYYANKYNGVFQECCQAEDK	16,HTL_AC_azide#0;24,Carbamidomethyl[C]#0;25,Carbamidomethyl[C]#0;	6.39e-09	3988.82	3988.81	0.00619	1.55	TRUE
	3	RHPYFYAPELLYYANKYNGVFQECCQAEDK	16,HTL_AC_azide#0;24,Carbamidomethyl[C]#0;25,Carbamidomethyl[C]#0;	6.7e-09	3988.83	3988.81	0.01269	3.18	TRUE
	4	RHPYFYAPELLYYANKYNGVFQECCQAEDK	16,HTL_AC_azide#0;24,Carbamidomethyl[C]#0;25,Carbamidomethyl[C]#0;	7.04e-09	3988.82	3988.81	0.01141	2.86	TRUE
	5	RHPYFYAPELLYYANKYNGVFQECCQAEDK	16,HTL_AC_azide#0;24,Carbamidomethyl[C]#0;25,Carbamidomethyl[C]#0;	7.43e-09	3988.83	3988.81	0.0128	3.21	TRUE
	4	RHPYFYAPELLYYANKYNGVFQECCQAEDK	16,HTL_AC_azide#0;24,Carbamidomethyl[C]#0;25,Carbamidomethyl[C]#0;	1.06e-08	3988.82	3988.81	0.00563	1.41	TRUE
	4	RHPYFYAPELLYYANKYNGVFQECCQAEDK	16,HTL_AC_azide#0;24,Carbamidomethyl[C]#0;25,Carbamidomethyl[C]#0;	1.22e-08	3988.81	3988.81	0.00118	0.3	TRUE
	4	RHPYFYAPELLYYANKYNGVFQECCQAEDK	16,HTL_AC_azide#0;24,Carbamidomethyl[C]#0;25,Carbamidomethyl[C]#0;	1.23e-08	3988.82	3988.81	0.00856	2.15	TRUE
	4	RHPYFYAPELLYYANKYNGVFQECCQAEDK	16,HTL_AC_azide#0;24,Carbamidomethyl[C]#0;25,Carbamidomethyl[C]#0;	1.45e-08	3988.81	3988.81	-0.00291	-0.73	TRUE
	4	RHPYFYAPELLYYANKYNGVFQECCQAEDK	16,HTL_AC_azide#0;24,Carbamidomethyl[C]#0;25,Carbamidomethyl[C]#0;	1.68e-08	3988.82	3988.81	0.00863	2.16	TRUE
	4	RHPYFYAPELLYYANKYNGVFQECCQAEDK	16,HTL_AC_azide#0;24,Carbamidomethyl[C]#0;25,Carbamidomethyl[C]#0;	2.32e-08	3988.83	3988.81	0.01349	3.38	TRUE
	4	RHPYFYAPELLYYANKYNGVFQECCQAEDK	16,HTL_AC_azide#0;24,Carbamidomethyl[C]#0;25,Carbamidomethyl[C]#0;	2.93e-08	3988.8	3988.81	-0.01125	-2.82	TRUE
	5	RHPYFYAPELLYYANKYNGVFQECCQAEDK	16,HTL_AC_azide#0;24,Carbamidomethyl[C]#0;25,Carbamidomethyl[C]#0;	3.32e-08	3988.83	3988.81	0.01869	4.69	TRUE
	5	RHPYFYAPELLYYANKYNGVFQECCQAEDK	16,HTL_AC_azide#0;24,Carbamidomethyl[C]#0;25,Carbamidomethyl[C]#0;	3.41e-08	3988.83	3988.81	0.0196	4.91	TRUE
	5	RHPYFYAPELLYYANKYNGVFQECCQAEDK	16,HTL_AC_azide#0;24,Carbamidomethyl[C]#0;25,Carbamidomethyl[C]#0;	4.8e-08	3988.83	3988.81	0.01383	3.47	TRUE
	5	RHPYFYAPELLYYANKYNGVFQECCQAEDK	16,HTL_AC_azide#0;24,Carbamidomethyl[C]#0;25,Carbamidomethyl[C]#0;	5.91e-08	3988.83	3988.81	0.01202	3.01	TRUE
	5	RHPYFYAPELLYYANKYNGVFQECCQAEDK	16,HTL_AC_azide#0;24,Carbamidomethyl[C]#0;25,Carbamidomethyl[C]#0;	7.3e-08	3988.83	3988.81	0.01364	3.42	TRUE
	4	RHPYFYAPELLYYANKYNGVFQECCQAEDK	16,HTL_AC_azide#0;24,Carbamidomethyl[C]#0;25,Carbamidomethyl[C]#0;	7.42e-08	3988.82	3988.81	0.0109	2.73	TRUE
	5	RHPYFYAPELLYYANKYNGVFQECCQAEDK	16,HTL_AC_azide#0;24,Carbamidomethyl[C]#0;25,Carbamidomethyl[C]#0;	9.85e-08	3988.82	3988.81	0.01125	2.82	TRUE
	4	RHPYFYAPELLYYANKYNGVFQECCQAEDK	16,HTL_AC_azide#0;24,Carbamidomethyl[C]#0;25,Carbamidomethyl[C]#0;	1.2e-07	3988.81	3988.81	0.00132	0.33	TRUE
	4	RHPYFYAPELLYYANKYNGVFQECCQAEDK	16,HTL_AC_azide#0;24,Carbamidomethyl[C]#0;25,Carbamidomethyl[C]#0;	1.87e-07	3988.83	3988.81	0.01521	3.81	TRUE
	5	RHPYFYAPELLYYANKYNGVFQECCQAEDK	16,HTL_AC_azide#0;24,Carbamidomethyl[C]#0;25,Carbamidomethyl[C]#0;	2.16e-07	3988.82	3988.81	0.00512	1.28	TRUE
	5	RHPYFYAPELLYYANKYNGVFQECCQAEDK	16,HTL_AC_azide#0;24,Carbamidomethyl[C]#0;25,Carbamidomethyl[C]#0;	2.45e-07	3988.82	3988.81	0.00884	2.22	TRUE
	5	RHPYFYAPELLYYANKYNGVFQECCQAEDK	16,HTL_AC_azide#0;24,Carbamidomethyl[C]#0;25,Carbamidomethyl[C]#0;	3.3e-07	3988.83	3988.81	0.02102	5.27	TRUE
	5	RHPYFYAPELLYYANKYNGVFQECCQAEDK	16,HTL_AC_azide#0;24,Carbamidomethyl[C]#0;25,Carbamidomethyl[C]#0;	3.71e-07	3988.82	3988.81	0.00678	1.7	TRUE
	5	RHPYFYAPELLYYANKYNGVFQECCQAEDK	16,HTL_AC_azide#0;24,Carbamidomethyl[C]#0;25,Carbamidomethyl[C]#0;	4.74e-07	3988.82	3988.81	0.012	3.01	TRUE
	5	RHPYFYAPELLYYANKYNGVFQECCQAEDK	16,HTL_AC_azide#0;24,Carbamidomethyl[C]#0;25,Carbamidomethyl[C]#0;	5.31e-07	3988.83	3988.81	0.01235	3.1	TRUE
	4	RHPYFYAPELLYYANKYNGVFQECCQAEDK	16,HTL_AC_azide#0;24,Carbamidomethyl[C]#0;25,Carbamidomethyl[C]#0;	8.62e-07	3988.82	3988.81	0.01091	2.74	TRUE
	5	RHPYFYAPELLYYANKYNGVFQECCQAEDK	16,HTL_AC_azide#0;24,Carbamidomethyl[C]#0;25,Carbamidomethyl[C]#0;	9.95e-07	3988.82	3988.81	0.00705	1.77	TRUE
	4	RHPYFYAPELLYYANKYNGVFQECCQAEDK	16,HTL_AC_azide#0;24,Carbamidomethyl[C]#0;25,Carbamidomethyl[C]#0;	1.19e-06	3988.82	3988.81	0.01102	2.76	TRUE
	3	RHPYFYAPELLYYANKYNGVFQECCQAEDK	16,HTL_AC_azide#0;24,Carbamidomethyl[C]#0;25,Carbamidomethyl[C]#0;	3.35e-06	3988.79	3988.81	-0.01971	-4.94	TRUE
	4	RHPYFYAPELLYYANKYNGVFQECCQAEDK	16,HTL_AC_azide#0;24,Carbamidomethyl[C]#0;25,Carbamidomethyl[C]#0;	3.35e-06	3988.83	3988.81	0.01787	4.48	TRUE
	5	RHPYFYAPELLYYANKYNGVFQECCQAEDK	16,HTL_AC_azide#0;24,Carbamidomethyl[C]#0;25,Carbamidomethyl[C]#0;	5.88e-06	3988.81	3988.81	-0.00117	-0.29	TRUE
	5	RHPYFYAPELLYYANKYNGVFQECCQAEDK	16,HTL_AC_azide#0;24,Carbamidomethyl[C]#0;25,Carbamidomethyl[C]#0;	6.27e-06	3988.8	3988.81	-0.01708	-4.28	TRUE
	4	RHPYFYAPELLYYANKYNGVFQECCQAEDK	16,HTL_AC_azide#0;24,Carbamidomethyl[C]#0;25,Carbamidomethyl[C]#0;	9.73e-06	3988.8	3988.81	-0.00802	-2.01	TRUE
	5	RHPYFYAPELLYYANKYNGVFQECCQAEDK	16,HTL_AC_azide#0;24,Carbamidomethyl[C]#0;25,Carbamidomethyl[C]#0;	1.27e-05	3988.82	3988.81	0.00544	1.36	TRUE
	5	RHPYFYAPELLYYANKYNGVFQECCQAEDK	16,HTL_AC_azide#0;24,Carbamidomethyl[C]#0;25,Carbamidomethyl[C]#0;	2.69e-05	3988.82	3988.81	0.01141	2.86	TRUE
	4	RHPYFYAPELLYYANKYNGVFQECCQAEDK	16,HTL_AC_azide#0;24,Carbamidomethyl[C]#0;25,Carbamidomethyl[C]#0;	0.000267	3988.81	3988.81	-0.00395	-0.99	TRUE
	4	RHPYFYAPELLYYANKYNGVFQECCQAEDK	16,HTL_AC_azide#0;24,Carbamidomethyl[C]#0;25,Carbamidomethyl[C]#0;	0.00104	3988.82	3988.81	0.00651	1.63	TRUE
	5	RHPYFYAPELLYYANKYNGVFQECCQAEDK	16,HTL_AC_azide#0;24,Carbamidomethyl[C]#0;25,Carbamidomethyl[C]#0;	0.00127	3988.82	3988.81	0.00957	2.4	TRUE
	4	RHPYFYAPELLYYANKYNGVFQECCQAEDK	16,HTL_AC_azide#0;24,Carbamidomethyl[C]#0;25,Carbamidomethyl[C]#0;	0.0111	3988.82	3988.81	0.00628	1.57	TRUE
	4	RHPYFYAPELLYYANKYNGVFQECCQAEDK	16,HTL_AC_azide#0;24,Carbamidomethyl[C]#0;25,Carbamidomethyl[C]#0;	0.0114	3988.78	3988.81	-0.03274	-8.21	TRUE
	5	RHPYFYAPELLYYANKYNGVFQECCQAEDK	16,HTL_AC_azide#0;24,Carbamidomethyl[C]#0;25,Carbamidomethyl[C]#0;	0.0146	3988.82	3988.81	0.01056	2.65	TRUE
	5	RHPYFYAPELLYYANKYNGVFQECCQAEDK	16,HTL_AC_azide#0;24,Carbamidomethyl[C]#0;25,Carbamidomethyl[C]#0;	0.0284	3988.82	3988.81	0.00567	1.42	TRUE
	5	RHPYFYAPELLYYANKYNGVFQECCQAEDK	16,HTL_AC_azide#0;24,Carbamidomethyl[C]#0;25,Carbamidomethyl[C]#0;	0.145	3988.82	3988.81	0.01145	2.87	TRUE
	4	RHPYFYAPELLYYANKYNGVFQECCQAEDK	16,HTL_AC_azide#0;24,Carbamidomethyl[C]#0;25,Carbamidomethyl[C]#0;	0.2	3988.82	3988.81	0.00481	1.21	TRUE
	4	RHPYFYAPELLYYANKYNGVFQECCQAEDK	16,HTL_AC_azide#0;24,Carbamidomethyl[C]#0;30,HTL_AC_azide#0;	0.000223	4146.95	4146.89	0.06144	14.82	TRUE
	5	RHPYFYAPELLYYANKYNGVFQECCQAEDK	16,HTL_AC_azide#0;24,Carbamidomethyl[C]#0;30,HTL_AC_azide#0;	0.00795	4146.94	4146.89	0.05165	12.46	TRUE
	4	RHPYFYAPELLYYANKYNGVFQECCQAEDK	16,HTL_AC_azide#0;25,Carbamidomethyl[C]#0;	6.14e-06	3931.81	3931.79	0.02311	5.88	TRUE
	4	RHPYFYAPELLYYANKYNGVFQECCQAEDK	16,HTL_AC_azide#0;25,Carbamidomethyl[C]#0;	1.3e-05	3931.77	3931.79	-0.02327	-5.92	TRUE
	4	RHPYFYAPELLYYANKYNGVFQECCQAEDK	16,HTL_AC_azide#0;25,Carbamidomethyl[C]#0;	0.00012	3931.78	3931.79	-0.01037	-2.64	TRUE
	4	RHPYFYAPELLYYANKYNGVFQECCQAEDK	16,HTL_AC_azide#0;25,Carbamidomethyl[C]#0;	0.00031	3931.74	3931.79	-0.05314	-13.52	TRUE
	4	RHPYFYAPELLYYANKYNGVFQECCQAEDK	16,HTL_AC_azide#0;25,Carbamidomethyl[C]#0;	0.000369	3931.79	3931.79	-0.00192	-0.49	TRUE
	4	RHPYFYAPELLYYANKYNGVFQECCQAEDK	16,HTL_AC_azide#0;25,Carbamidomethyl[C]#0;	0.000678	3931.8	3931.79	0.00506	1.29	TRUE
	4	RHPYFYAPELLYYANKYNGVFQECCQAEDK	16,HTL_AC_azide#0;25,Carbamidomethyl[C]#0;	0.00787	3931.79	3931.79	0.00295	0.75	TRUE
	4	RHPYFYAPELLYYANKYNGVFQECCQAEDK	16,HTL_AC_azide#0;25,Carbamidomethyl[C]#0;	0.0261	3931.8	3931.79	0.0092	2.34	TRUE
	4	RHPYFYAPELLYYANKYNGVFQECCQAEDK	16,HTL_AC_azide#0;25,Carbamidomethyl[C]#0;30,HTL_AC_azide#0;	0.0025	4146.94	4146.89	0.05164	12.45	TRUE
	4	RHPYFYAPELLYYANKYNGVFQECCQAEDK	16,HTL_AC_azide#0;30,HTL_AC_azide#0;	4.25e-06	4089.91	4089.87	0.04565	11.16	TRUE
	4	RHPYFYAPELLYYANKYNGVFQECCQAEDK	16,HTL_AC_azide#0;30,HTL_AC_azide#0;	2.64e-05	4089.92	4089.87	0.04856	11.87	TRUE
	4	RHPYFYAPELLYYANKYNGVFQECCQAEDK	16,HTL_AC_azide#0;30,HTL_AC_azide#0;	0.000138	4089.91	4089.87	0.0375	9.17	TRUE
	5	RHPYFYAPELLYYANKYNGVFQECCQAEDK	16,HTL_AC_azide#0;30,HTL_AC_azide#0;	0.000246	4089.91	4089.87	0.04359	10.66	TRUE
	5	RHPYFYAPELLYYANKYNGVFQECCQAEDK	16,HTL_AC_azide#0;30,HTL_AC_azide#0;	0.00102	4089.92	4089.87	0.0491	12.01	TRUE
	3	RHPYFYAPELLYYANKYNGVFQECCQAEDK	16,HTL_AC_azide#0;30,HTL_AC_azide#0;	0.00107	4089.91	4089.87	0.04087	9.99	TRUE
	4	RHPYFYAPELLYYANKYNGVFQECCQAEDK	16,HTL_AC_azide#0;30,HTL_AC_azide#0;	0.0011	4089.89	4089.87	0.01717	4.2	TRUE
	4	RHPYFYAPELLYYANKYNGVFQECCQAEDK	16,HTL_AC_azide#0;30,HTL_AC_azide#0;	0.00552	4089.8	4089.87	-0.07058	-17.26	TRUE
	4	RHPYFYAPELLYYANKYNGVFQECCQAEDK	16,HTL_AC_azide#0;30,HTL_AC_azide#0;	0.0162	4089.87	4089.87	0.00493	1.21	TRUE
	5	RHPYFYAPELLYYANKYNGVFQECCQAEDK	16,HTL_AC_azide#0;30,HTL_AC_azide#0;	0.0175	4089.9	4089.87	0.02733	6.68	TRUE
	4	RHPYFYAPELLYYANKYNGVFQECCQAEDK	16,HTL_AC_azide#0;30,HTL_AC_azide#0;	0.0709	4089.91	4089.87	0.0391	9.56	TRUE
	4	RHPYFYAPELLYYANKYNGVFQECCQAEDK	16,HTL_AC_azide#0;30,HTL_AC_azide#0;	0.115	4089.88	4089.87	0.01529	3.74	TRUE
	4	RHPYFYAPELLYYANKYNGVFQECCQAEDK	16,HTL_AC_azide#0;30,HTL_AC_azide#0;	0.13	4089.91	4089.87	0.0425	10.39	TRUE
	3	DAIPENLPPLTADFAEDKDVCK	18,HTL_AC_azide#0;21,Carbamidomethyl[C]#0;	0.0147	2673.28	2673.28	0.00098	0.37	TRUE
	4	DAIPENLPPLTADFAEDKDVCKNYQEAK	18,HTL_AC_azide#0;21,Carbamidomethyl[C]#0;	0.319	3406.67	3406.62	0.05503	16.15	TRUE
	3	DAIPENLPPLTADFAEDKDVCK	18,HTL_AC_azide#0;21,Carbamidomethyl[C]#0;	0.341	2673.26	2673.28	-0.02341	-8.76	TRUE
	3	TCVADESHAGCEKSLHTLFGDELCK	2,Carbamidomethyl[C]#0;13,HTL_AC_azide#0;25,HTL_AC_azide#0;	0.0295	3180.46	3180.42	0.03813	11.99	TRUE
	2	ECCDKPLLEK	2,Carbamidomethyl[C]#0;3,Carbamidomethyl[C]#0;5,HTL_AC_azide#0;	0.00311	1506.7	1506.7	0.00358	2.38	TRUE
	3	ECCDKPLLEK	2,Carbamidomethyl[C]#0;3,Carbamidomethyl[C]#0;5,HTL_AC_azide#0;	0.0568	1506.7	1506.7	0.00427	2.83	TRUE
	3	ECCDKPLLEK	2,Carbamidomethyl[C]#0;3,Carbamidomethyl[C]#0;5,HTL_AC_azide#0;	0.106	1506.71	1506.7	0.00581	3.86	TRUE
	3	ECCDKPLLEK	2,Carbamidomethyl[C]#0;3,Carbamidomethyl[C]#0;5,HTL_AC_azide#0;	0.128	1506.7	1506.7	0.00219	1.45	TRUE
	3	ECCDKPLLEK	2,Carbamidomethyl[C]#0;3,Carbamidomethyl[C]#0;5,HTL_AC_azide#0;	0.189	1506.71	1506.7	0.00607	4.03	TRUE
	3	ECCDKPLLEK	2,Carbamidomethyl[C]#0;3,Carbamidomethyl[C]#0;5,HTL_AC_azide#0;	0.189	1506.71	1506.7	0.01142	7.58	TRUE
	2	ECCDKPLLEK	2,Carbamidomethyl[C]#0;3,Carbamidomethyl[C]#0;5,HTL_AC_azide#0;	0.252	1506.71	1506.7	0.00505	3.35	TRUE
	2	ECCDKPLLEK	2,Carbamidomethyl[C]#0;3,Carbamidomethyl[C]#0;5,HTL_AC_azide#0;	0.327	1506.7	1506.7	0.0028	1.86	TRUE
	2	LCVLHEKTPVSEK	2,Carbamidomethyl[C]#0;7,HTL_AC_azide#0;	1.34e-06	1754.92	1754.92	0.00214	1.22	TRUE
	2	LCVLHEKTPVSEK	2,Carbamidomethyl[C]#0;7,HTL_AC_azide#0;	4.16e-06	1754.92	1754.92	0.00355	2.02	TRUE
	2	LCVLHEKTPVSEK	2,Carbamidomethyl[C]#0;7,HTL_AC_azide#0;	7.15e-06	1754.92	1754.92	0.00289	1.65	TRUE
	2	LCVLHEKTPVSEK	2,Carbamidomethyl[C]#0;7,HTL_AC_azide#0;	8.93e-06	1754.92	1754.92	0.00173	0.99	TRUE
	4	LCVLHEKTPVSEK	2,Carbamidomethyl[C]#0;7,HTL_AC_azide#0;	2.03e-05	1754.92	1754.92	0.00293	1.67	TRUE
	2	LCVLHEKTPVSEK	2,Carbamidomethyl[C]#0;7,HTL_AC_azide#0;	2.43e-05	1754.92	1754.92	0.00376	2.14	TRUE
	2	LCVLHEKTPVSEK	2,Carbamidomethyl[C]#0;7,HTL_AC_azide#0;	4.59e-05	1754.92	1754.92	0.0039	2.22	TRUE
	2	LCVLHEKTPVSEK	2,Carbamidomethyl[C]#0;7,HTL_AC_azide#0;	9.85e-05	1754.92	1754.92	0.00279	1.59	TRUE
	3	LCVLHEKTPVSEK	2,Carbamidomethyl[C]#0;7,HTL_AC_azide#0;	0.000275	1754.92	1754.92	0.00337	1.92	TRUE
	3	LCVLHEKTPVSEK	2,Carbamidomethyl[C]#0;7,HTL_AC_azide#0;	0.000311	1754.92	1754.92	0.00463	2.64	TRUE
	3	LCVLHEKTPVSEK	2,Carbamidomethyl[C]#0;7,HTL_AC_azide#0;	0.00234	1754.92	1754.92	0.00154	0.88	TRUE
	2	LCVLHEKTPVSEK	2,Carbamidomethyl[C]#0;7,HTL_AC_azide#0;	0.00293	1754.92	1754.92	0.00177	1.01	TRUE
	4	LCVLHEKTPVSEK	2,Carbamidomethyl[C]#0;7,HTL_AC_azide#0;	0.00405	1754.92	1754.92	0.00477	2.72	TRUE
	4	LCVLHEKTPVSEK	2,Carbamidomethyl[C]#0;7,HTL_AC_azide#0;	0.00432	1754.92	1754.92	0.00371	2.11	TRUE
	4	LCVLHEKTPVSEK	2,Carbamidomethyl[C]#0;7,HTL_AC_azide#0;	0.00717	1754.92	1754.92	0.00325	1.85	TRUE
	4	LCVLHEKTPVSEK	2,Carbamidomethyl[C]#0;7,HTL_AC_azide#0;	0.00723	1754.92	1754.92	0.00338	1.93	TRUE
	3	LCVLHEKTPVSEK	2,Carbamidomethyl[C]#0;7,HTL_AC_azide#0;	0.0188	1754.92	1754.92	0.00298	1.7	TRUE
	2	LCVLHEKTPVSEK	2,Carbamidomethyl[C]#0;7,HTL_AC_azide#0;	0.0248	1754.92	1754.92	0.00187	1.07	TRUE
	2	CCAADDKEACFAVEGPK	2,Carbamidomethyl[C]#0;7,HTL_AC_azide#0;	0.0249	2028.89	2028.85	0.03399	16.75	TRUE
	3	LCVLHEKTPVSEK	2,Carbamidomethyl[C]#0;7,HTL_AC_azide#0;	0.0322	1754.92	1754.92	0.00246	1.4	TRUE
	2	CCAADDKEACFAVEGPK	2,Carbamidomethyl[C]#0;7,HTL_AC_azide#0;	0.0332	2028.89	2028.85	0.03493	17.21	TRUE
	3	LCVLHEKTPVSEK	2,Carbamidomethyl[C]#0;7,HTL_AC_azide#0;	0.135	1754.92	1754.92	0.00432	2.46	TRUE
	4	LCVLHEKTPVSEK	2,Carbamidomethyl[C]#0;7,HTL_AC_azide#0;	0.161	1754.92	1754.92	0.00163	0.93	TRUE
	3	LCVLHEKTPVSEK	2,Carbamidomethyl[C]#0;7,HTL_AC_azide#0;	0.225	1754.92	1754.92	0.00503	2.86	TRUE
	3	LCVLHEKTPVSEK	2,Carbamidomethyl[C]#0;7,HTL_AC_azide#0;	0.268	1754.92	1754.92	0.00341	1.94	TRUE
	3	LCVLHEKTPVSEK	2,Carbamidomethyl[C]#0;7,HTL_AC_azide#0;	0.276	1754.92	1754.92	0.00347	1.98	TRUE
	3	LCVLHEKTPVSEK	2,Carbamidomethyl[C]#0;7,HTL_AC_azide#0;	0.324	1754.92	1754.92	0.00683	3.89	TRUE
	3	LCVLHEKTPVSEK	2,Carbamidomethyl[C]#0;7,HTL_AC_azide#0;	0.326	1754.92	1754.92	0.00211	1.2	TRUE
	3	LCVLHEKTPVSEK	2,Carbamidomethyl[C]#0;7,HTL_AC_azide#0;	0.355	1754.92	1754.92	0.00251	1.43	TRUE
	2	CCAADDKEACFAVEGPK	2,Carbamidomethyl[C]#0;7,HTL_AC_azide#0;	0.37	2028.89	2028.85	0.03426	16.89	TRUE
	3	HKSEIAHR	2,HTL_AC_azide#0;	0.042	1192.63	1192.63	0.00302	2.53	TRUE
	3	HKSEIAHR	2,HTL_AC_azide#0;	0.056	1192.63	1192.63	0.00528	4.43	TRUE
	3	HKSEIAHR	2,HTL_AC_azide#0;	0.0585	1192.63	1192.63	0.0022	1.84	TRUE
	3	HKSEIAHR	2,HTL_AC_azide#0;	0.0765	1192.63	1192.63	0.00591	4.96	TRUE
	3	HKSEIAHR	2,HTL_AC_azide#0;	0.0804	1192.63	1192.63	0.0019	1.59	TRUE
	3	HKSEIAHR	2,HTL_AC_azide#0;	0.0897	1192.63	1192.63	0.00332	2.78	TRUE
	3	HKSEIAHR	2,HTL_AC_azide#0;	0.106	1192.63	1192.63	0.00033	0.28	TRUE
	3	HKSEIAHR	2,HTL_AC_azide#0;	0.109	1192.63	1192.63	0.00031	0.26	TRUE
	3	HKSEIAHR	2,HTL_AC_azide#0;	0.109	1192.63	1192.63	0.00095	0.8	TRUE
	3	HKSEIAHR	2,HTL_AC_azide#0;	0.116	1192.63	1192.63	0.00457	3.83	TRUE
	3	HKSEIAHR	2,HTL_AC_azide#0;	0.123	1192.63	1192.63	0.00226	1.9	TRUE
	3	HKSEIAHR	2,HTL_AC_azide#0;	0.153	1192.63	1192.63	0.00078	0.65	TRUE
	3	HKSEIAHR	2,HTL_AC_azide#0;	0.163	1192.63	1192.63	7e-05	0.06	TRUE
	3	HKSEIAHR	2,HTL_AC_azide#0;	0.205	1192.63	1192.63	0.00558	4.68	TRUE
	3	HKSEIAHR	2,HTL_AC_azide#0;	0.215	1192.63	1192.63	0.00154	1.29	TRUE
	3	HKSEIAHR	2,HTL_AC_azide#0;	0.221	1192.64	1192.63	0.01261	10.58	TRUE
	3	HKSEIAHR	2,HTL_AC_azide#0;	0.236	1192.63	1192.63	0.00599	5.02	TRUE
	3	HKSEIAHR	2,HTL_AC_azide#0;	0.239	1192.63	1192.63	0.0034	2.85	TRUE
	3	HKSEIAHR	2,HTL_AC_azide#0;	0.247	1192.63	1192.63	0.00447	3.75	TRUE
	3	HKSEIAHR	2,HTL_AC_azide#0;	0.334	1192.63	1192.63	0.00312	2.62	TRUE
	2	LKHLVDEPQNLIK	2,HTL_AC_azide#0;	4.05e-06	1762	1761.99	0.00283	1.6	TRUE
	2	LKHLVDEPQNLIK	2,HTL_AC_azide#0;	2.04e-05	1762	1761.99	0.00496	2.82	TRUE
	2	LKHLVDEPQNLIK	2,HTL_AC_azide#0;	0.000124	1762	1761.99	0.00376	2.13	TRUE
	3	FKDLGEEHFK	2,HTL_AC_azide#0;	0.000129	1464.72	1464.72	0.00335	2.29	TRUE
	4	LKHLVDEPQNLIK	2,HTL_AC_azide#0;	0.0011	1762	1761.99	0.00591	3.35	TRUE
	2	FKDLGEEHFK	2,HTL_AC_azide#0;	0.00112	1464.72	1464.72	0.00297	2.03	TRUE
	4	HKPKATEEQLK	2,HTL_AC_azide#0;	0.00119	1523.83	1523.82	0.00339	2.22	TRUE
	2	FKDLGEEHFK	2,HTL_AC_azide#0;	0.00135	1464.72	1464.72	0.00215	1.47	TRUE
	2	FKDLGEEHFK	2,HTL_AC_azide#0;	0.00152	1464.72	1464.72	0.0038	2.6	TRUE
	3	FKDLGEEHFK	2,HTL_AC_azide#0;	0.00155	1464.72	1464.72	0.00394	2.69	TRUE
	2	FKDLGEEHFK	2,HTL_AC_azide#0;	0.00167	1464.72	1464.72	0.00399	2.72	TRUE
	3	FKDLGEEHFK	2,HTL_AC_azide#0;	0.00176	1464.72	1464.72	0.00344	2.35	TRUE
	4	HKPKATEEQLK	2,HTL_AC_azide#0;	0.00194	1523.83	1523.82	0.00198	1.3	TRUE
	4	HKPKATEEQLK	2,HTL_AC_azide#0;	0.00211	1523.83	1523.82	0.00313	2.05	TRUE
	3	FKDLGEEHFK	2,HTL_AC_azide#0;	0.00226	1464.72	1464.72	0.00371	2.54	TRUE
	3	FKDLGEEHFK	2,HTL_AC_azide#0;	0.00265	1464.72	1464.72	0.00423	2.89	TRUE
	3	FKDLGEEHFK	2,HTL_AC_azide#0;	0.00274	1464.72	1464.72	0.00428	2.92	TRUE
	2	LKHLVDEPQNLIK	2,HTL_AC_azide#0;	0.00276	1762	1761.99	0.00366	2.08	TRUE
	3	FKDLGEEHFK	2,HTL_AC_azide#0;	0.0029	1464.72	1464.72	0.00336	2.29	TRUE
	3	FKDLGEEHFK	2,HTL_AC_azide#0;	0.00324	1464.72	1464.72	0.00403	2.75	TRUE
	3	FKDLGEEHFK	2,HTL_AC_azide#0;	0.0035	1464.72	1464.72	0.00312	2.13	TRUE
	3	LKHLVDEPQNLIK	2,HTL_AC_azide#0;	0.00354	1762	1761.99	0.00277	1.57	TRUE
	4	HKPKATEEQLK	2,HTL_AC_azide#0;	0.00363	1523.83	1523.82	0.0007	0.46	TRUE
	3	FKDLGEEHFK	2,HTL_AC_azide#0;	0.00364	1464.72	1464.72	0.00383	2.61	TRUE
	3	FKDLGEEHFK	2,HTL_AC_azide#0;	0.0037	1464.72	1464.72	0.00288	1.97	TRUE
	3	LKHLVDEPQNLIK	2,HTL_AC_azide#0;	0.0037	1761.99	1761.99	-0.00172	-0.97	TRUE
	4	FKDLGEEHFK	2,HTL_AC_azide#0;	0.00392	1464.72	1464.72	0.00229	1.56	TRUE
	3	FKDLGEEHFK	2,HTL_AC_azide#0;	0.00397	1464.72	1464.72	0.00253	1.73	TRUE
	3	LKHLVDEPQNLIK	2,HTL_AC_azide#0;	0.00403	1762	1761.99	0.00261	1.48	TRUE
	4	FKDLGEEHFK	2,HTL_AC_azide#0;	0.00404	1464.72	1464.72	0.00347	2.37	TRUE
	4	FKDLGEEHFK	2,HTL_AC_azide#0;	0.00469	1464.72	1464.72	0.00341	2.33	TRUE
	4	HKPKATEEQLK	2,HTL_AC_azide#0;	0.0047	1523.83	1523.82	0.00447	2.93	TRUE
	4	FKDLGEEHFK	2,HTL_AC_azide#0;	0.0049	1464.72	1464.72	0.00258	1.76	TRUE
	3	FKDLGEEHFK	2,HTL_AC_azide#0;	0.00495	1464.72	1464.72	0.00346	2.36	TRUE
	4	FKDLGEEHFK	2,HTL_AC_azide#0;	0.00506	1464.72	1464.72	0.00283	1.93	TRUE
	4	FKDLGEEHFK	2,HTL_AC_azide#0;	0.00544	1464.72	1464.72	0.00392	2.68	TRUE
	4	FKDLGEEHFK	2,HTL_AC_azide#0;	0.00563	1464.72	1464.72	0.00305	2.08	TRUE
	3	FKDLGEEHFK	2,HTL_AC_azide#0;	0.00617	1464.72	1464.72	0.00468	3.19	TRUE
	4	FKDLGEEHFK	2,HTL_AC_azide#0;	0.00884	1464.72	1464.72	0.00186	1.27	TRUE
	4	FKDLGEEHFK	2,HTL_AC_azide#0;	0.00893	1464.72	1464.72	0.00414	2.82	TRUE
	3	FKDLGEEHFK	2,HTL_AC_azide#0;	0.0154	1464.72	1464.72	0.00378	2.58	TRUE
	3	FKDLGEEHFK	2,HTL_AC_azide#0;	0.0168	1464.72	1464.72	0.00135	0.92	TRUE
	2	FKDLGEEHFK	2,HTL_AC_azide#0;	0.0251	1464.73	1464.72	0.00618	4.22	TRUE
	2	FKDLGEEHFK	2,HTL_AC_azide#0;	0.0282	1464.72	1464.72	0.00233	1.59	TRUE
	3	LKHLVDEPQNLIK	2,HTL_AC_azide#0;	0.0363	1762	1761.99	0.0041	2.33	TRUE
	3	FKDLGEEHFK	2,HTL_AC_azide#0;	0.0478	1464.72	1464.72	0.00277	1.89	TRUE
	3	HKPKATEEQLK	2,HTL_AC_azide#0;	0.0543	1523.83	1523.82	0.00238	1.56	TRUE
	3	FKDLGEEHFK	2,HTL_AC_azide#0;	0.0549	1464.72	1464.72	0.00406	2.77	TRUE
	3	FKDLGEEHFK	2,HTL_AC_azide#0;	0.0559	1464.72	1464.72	0.00404	2.76	TRUE
	4	FKDLGEEHFK	2,HTL_AC_azide#0;	0.0607	1464.72	1464.72	0.00382	2.61	TRUE
	3	FKDLGEEHFK	2,HTL_AC_azide#0;	0.0607	1464.72	1464.72	0.0037	2.53	TRUE
	3	LKECCDKPLLEK	2,HTL_AC_azide#0;	0.0736	1633.87	1633.84	0.02906	17.78	TRUE
	3	LKECCDKPLLEK	2,HTL_AC_azide#0;	0.0756	1633.86	1633.84	0.02722	16.66	TRUE
	2	FKDLGEEHFK	2,HTL_AC_azide#0;	0.0795	1464.73	1464.72	0.00727	4.96	TRUE
	3	FKDLGEEHFK	2,HTL_AC_azide#0;	0.082	1464.72	1464.72	0.00481	3.28	TRUE
	2	FKDLGEEHFK	2,HTL_AC_azide#0;	0.0962	1464.73	1464.72	0.01011	6.9	TRUE
	4	LKECCDKPLLEK	2,HTL_AC_azide#0;	0.0964	1633.87	1633.84	0.03254	19.91	TRUE
	4	FKDLGEEHFK	2,HTL_AC_azide#0;	0.1	1464.72	1464.72	0.00358	2.45	TRUE
	3	HKPKATEEQLK	2,HTL_AC_azide#0;	0.124	1523.83	1523.82	0.00422	2.77	TRUE
	3	HKPKATEEQLK	2,HTL_AC_azide#0;	0.152	1523.83	1523.82	0.00611	4.01	TRUE
	2	FKDLGEEHFK	2,HTL_AC_azide#0;	0.168	1464.73	1464.72	0.00688	4.7	TRUE
	3	HKPKATEEQLK	2,HTL_AC_azide#0;	0.177	1523.83	1523.82	0.00319	2.09	TRUE
	2	FKDLGEEHFK	2,HTL_AC_azide#0;	0.223	1464.73	1464.72	0.0069	4.71	TRUE
	4	FKDLGEEHFK	2,HTL_AC_azide#0;	0.258	1464.72	1464.72	0.00189	1.29	TRUE
	4	LKECCDKPLLEK	2,HTL_AC_azide#0;	0.266	1633.87	1633.84	0.03106	19.01	TRUE
	4	FKDLGEEHFK	2,HTL_AC_azide#0;	0.268	1464.72	1464.72	0.00136	0.93	TRUE
	2	FKDLGEEHFK	2,HTL_AC_azide#0;	0.303	1464.73	1464.72	0.00806	5.5	TRUE
	2	FKDLGEEHFK	2,HTL_AC_azide#0;	0.316	1464.7	1464.72	-0.02004	-13.68	TRUE
	3	FKDLGEEHFK	2,HTL_AC_azide#0;	0.332	1464.72	1464.72	0.00259	1.76	TRUE
	4	FKDLGEEHFK	2,HTL_AC_azide#0;	0.349	1464.72	1464.72	0.00253	1.73	TRUE
	3	HKPKATEEQLK	2,HTL_AC_azide#0;	0.369	1523.83	1523.82	0.00292	1.92	TRUE
	2	LKECCDKPLLEK	2,HTL_AC_azide#0;4,Carbamidomethyl[C]#0;5,Carbamidomethyl[C]#0;	8.79e-05	1747.88	1747.88	0.00178	1.02	TRUE
	2	LKECCDKPLLEK	2,HTL_AC_azide#0;4,Carbamidomethyl[C]#0;5,Carbamidomethyl[C]#0;	9.58e-05	1747.88	1747.88	0.00178	1.02	TRUE
	4	LKECCDKPLLEK	2,HTL_AC_azide#0;4,Carbamidomethyl[C]#0;5,Carbamidomethyl[C]#0;	0.000271	1747.88	1747.88	0.00381	2.18	TRUE
	4	LKECCDKPLLEK	2,HTL_AC_azide#0;4,Carbamidomethyl[C]#0;5,Carbamidomethyl[C]#0;	0.000462	1747.88	1747.88	0.00323	1.85	TRUE
	4	LKECCDKPLLEK	2,HTL_AC_azide#0;4,Carbamidomethyl[C]#0;5,Carbamidomethyl[C]#0;	0.000554	1747.88	1747.88	0.003	1.72	TRUE
	3	LKECCDKPLLEK	2,HTL_AC_azide#0;4,Carbamidomethyl[C]#0;5,Carbamidomethyl[C]#0;	0.000682	1747.88	1747.88	0.00286	1.63	TRUE
	3	LKECCDKPLLEK	2,HTL_AC_azide#0;4,Carbamidomethyl[C]#0;5,Carbamidomethyl[C]#0;	0.00111	1747.88	1747.88	0.00373	2.14	TRUE
	4	LKECCDKPLLEK	2,HTL_AC_azide#0;4,Carbamidomethyl[C]#0;5,Carbamidomethyl[C]#0;	0.00143	1747.88	1747.88	0.00443	2.54	TRUE
	3	LKECCDKPLLEK	2,HTL_AC_azide#0;4,Carbamidomethyl[C]#0;5,Carbamidomethyl[C]#0;	0.0024	1747.88	1747.88	0.00413	2.36	TRUE
	4	LKECCDKPLLEK	2,HTL_AC_azide#0;4,Carbamidomethyl[C]#0;5,Carbamidomethyl[C]#0;	0.00281	1747.88	1747.88	0.00234	1.34	TRUE
	4	LKECCDKPLLEK	2,HTL_AC_azide#0;4,Carbamidomethyl[C]#0;5,Carbamidomethyl[C]#0;	0.00699	1747.88	1747.88	0.00202	1.15	TRUE
	2	LKECCDKPLLEK	2,HTL_AC_azide#0;4,Carbamidomethyl[C]#0;5,Carbamidomethyl[C]#0;	0.00951	1747.88	1747.88	0.00096	0.55	TRUE
	2	LKECCDKPLLEK	2,HTL_AC_azide#0;4,Carbamidomethyl[C]#0;5,Carbamidomethyl[C]#0;	0.0103	1747.88	1747.88	0.00144	0.82	TRUE
	3	LKECCDKPLLEK	2,HTL_AC_azide#0;4,Carbamidomethyl[C]#0;5,Carbamidomethyl[C]#0;	0.0134	1747.89	1747.88	0.00709	4.05	TRUE
	4	LKECCDKPLLEK	2,HTL_AC_azide#0;4,Carbamidomethyl[C]#0;5,Carbamidomethyl[C]#0;	0.0681	1747.88	1747.88	0.00162	0.92	TRUE
	4	LKECCDKPLLEK	2,HTL_AC_azide#0;4,Carbamidomethyl[C]#0;5,Carbamidomethyl[C]#0;	0.103	1747.88	1747.88	0.0026	1.48	TRUE
	3	LKECCDKPLLEK	2,HTL_AC_azide#0;4,Carbamidomethyl[C]#0;5,Carbamidomethyl[C]#0;	0.11	1747.88	1747.88	0.00455	2.6	TRUE
	2	LKECCDKPLLEK	2,HTL_AC_azide#0;4,Carbamidomethyl[C]#0;5,Carbamidomethyl[C]#0;	0.165	1747.88	1747.88	0.00236	1.35	TRUE
	2	LKECCDKPLLEK	2,HTL_AC_azide#0;4,Carbamidomethyl[C]#0;5,Carbamidomethyl[C]#0;	0.172	1747.88	1747.88	0.00127	0.73	TRUE
	2	LKECCDKPLLEK	2,HTL_AC_azide#0;4,Carbamidomethyl[C]#0;5,Carbamidomethyl[C]#0;	0.187	1747.88	1747.88	-0.0005	-0.29	TRUE
	2	LKPDPNTLCDEFKADEK	2,HTL_AC_azide#0;9,Carbamidomethyl[C]#0;	2.35e-06	2235.07	2235.07	0.00564	2.52	TRUE
	3	LKPDPNTLCDEFKADEK	2,HTL_AC_azide#0;9,Carbamidomethyl[C]#0;	2.86e-06	2235.07	2235.07	0.00461	2.06	TRUE
	4	LKPDPNTLCDEFKADEK	2,HTL_AC_azide#0;9,Carbamidomethyl[C]#0;	5.08e-06	2235.07	2235.07	0.0061	2.73	TRUE
	4	LKPDPNTLCDEFKADEK	2,HTL_AC_azide#0;9,Carbamidomethyl[C]#0;	7.91e-06	2235.07	2235.07	0.00416	1.86	TRUE
	2	LKPDPNTLCDEFKADEK	2,HTL_AC_azide#0;9,Carbamidomethyl[C]#0;	1.02e-05	2235.07	2235.07	0.00448	2	TRUE
	3	LKPDPNTLCDEFKADEK	2,HTL_AC_azide#0;9,Carbamidomethyl[C]#0;	1.73e-05	2235.07	2235.07	0.00261	1.17	TRUE
	3	LKPDPNTLCDEFKADEK	2,HTL_AC_azide#0;9,Carbamidomethyl[C]#0;	6.91e-05	2235.07	2235.07	0.00327	1.46	TRUE
	3	LKPDPNTLCDEFKADEK	2,HTL_AC_azide#0;9,Carbamidomethyl[C]#0;	7.34e-05	2235.07	2235.07	0.00276	1.23	TRUE
	3	LKPDPNTLCDEFKADEK	2,HTL_AC_azide#0;9,Carbamidomethyl[C]#0;	7.63e-05	2235.07	2235.07	0.00482	2.15	TRUE
	2	LKPDPNTLCDEFKADEK	2,HTL_AC_azide#0;9,Carbamidomethyl[C]#0;	8.26e-05	2235.07	2235.07	0.00284	1.27	TRUE
	3	LKPDPNTLCDEFKADEK	2,HTL_AC_azide#0;9,Carbamidomethyl[C]#0;	0.00012	2235.07	2235.07	0.0039	1.74	TRUE
	3	LKPDPNTLCDEFKADEK	2,HTL_AC_azide#0;9,Carbamidomethyl[C]#0;	0.000213	2235.07	2235.07	-0.00095	-0.42	TRUE
	2	LKPDPNTLCDEFK	2,HTL_AC_azide#0;9,Carbamidomethyl[C]#0;	0.000309	1791.87	1791.87	0.00047	0.26	TRUE
	4	LKPDPNTLCDEFKADEK	2,HTL_AC_azide#0;9,Carbamidomethyl[C]#0;	0.000414	2235.07	2235.07	0.00427	1.91	TRUE
	3	LKPDPNTLCDEFK	2,HTL_AC_azide#0;9,Carbamidomethyl[C]#0;	0.000423	1791.86	1791.87	-0.00897	-5.01	TRUE
	3	LKPDPNTLCDEFKADEK	2,HTL_AC_azide#0;9,Carbamidomethyl[C]#0;	0.000508	2235.07	2235.07	0.00317	1.42	TRUE
	4	LKPDPNTLCDEFKADEK	2,HTL_AC_azide#0;9,Carbamidomethyl[C]#0;	0.000509	2235.07	2235.07	0.00596	2.67	TRUE
	3	LKPDPNTLCDEFKADEK	2,HTL_AC_azide#0;9,Carbamidomethyl[C]#0;	0.000534	2235.07	2235.07	-0.0001	-0.04	TRUE
	4	LKPDPNTLCDEFKADEK	2,HTL_AC_azide#0;9,Carbamidomethyl[C]#0;	0.000637	2235.08	2235.07	0.01306	5.84	TRUE
	2	LKPDPNTLCDEFK	2,HTL_AC_azide#0;9,Carbamidomethyl[C]#0;	0.00341	1791.87	1791.87	0.00589	3.29	TRUE
	3	LKPDPNTLCDEFKADEK	2,HTL_AC_azide#0;9,Carbamidomethyl[C]#0;	0.0054	2235.07	2235.07	0.00479	2.14	TRUE
	3	LKPDPNTLCDEFKADEK	2,HTL_AC_azide#0;9,Carbamidomethyl[C]#0;	0.0069	2235.07	2235.07	0.00149	0.67	TRUE
	3	LKPDPNTLCDEFK	2,HTL_AC_azide#0;9,Carbamidomethyl[C]#0;	0.0074	1791.86	1791.87	-0.00575	-3.21	TRUE
	3	LKPDPNTLCDEFKADEK	2,HTL_AC_azide#0;9,Carbamidomethyl[C]#0;	0.00822	2235.05	2235.07	-0.02007	-8.98	TRUE
	4	LKPDPNTLCDEFKADEK	2,HTL_AC_azide#0;9,Carbamidomethyl[C]#0;	0.0137	2235.08	2235.07	0.01318	5.9	TRUE
	3	LKPDPNTLCDEFKADEK	2,HTL_AC_azide#0;9,Carbamidomethyl[C]#0;	0.0264	2235.07	2235.07	0.00497	2.22	TRUE
	4	DAIPENLPPLTADFAEDKDVCKNYQEAK	21,Carbamidomethyl[C]#0;22,HTL_AC_azide#0;	5.92e-07	3406.62	3406.62	0.00555	1.63	TRUE
	3	DAIPENLPPLTADFAEDKDVCKNYQEAK	21,Carbamidomethyl[C]#0;22,HTL_AC_azide#0;	0.000328	3406.63	3406.62	0.00727	2.14	TRUE
	4	GLVLIAFSQYLQQCPFDEHVK	21,HTL_AC_azide#0;	0.116	2650.38	2650.34	0.04024	15.18	TRUE
	4	SHCIAEVEKDAIPENLPPLTADFAEDKDVCK	27,HTL_AC_azide#0;	0.00213	3612.77	3612.73	0.04371	12.1	TRUE
	5	SHCIAEVEKDAIPENLPPLTADFAEDKDVCK	27,HTL_AC_azide#0;	0.00403	3612.77	3612.73	0.04726	13.08	TRUE
	5	HPYFYAPELLYYANKYNGVFQECCQAEDKGACLLPK	29,HTL_AC_azide#0;32,Carbamidomethyl[C]#0;	0.0494	4458.1	4458.07	0.02735	6.14	TRUE
	2	YICDNQDTISSKLK	3,Carbamidomethyl[C]#0;12,HTL_AC_azide#0;	2.84e-05	1899.92	1899.92	0.0031	1.63	TRUE
	2	YICDNQDTISSKLK	3,Carbamidomethyl[C]#0;12,HTL_AC_azide#0;	3.19e-05	1899.92	1899.92	0.00289	1.52	TRUE
	2	YICDNQDTISSKLK	3,Carbamidomethyl[C]#0;12,HTL_AC_azide#0;	0.000205	1899.92	1899.92	0.00489	2.57	TRUE
	2	YICDNQDTISSKLK	3,Carbamidomethyl[C]#0;12,HTL_AC_azide#0;	0.00139	1899.92	1899.92	0.00542	2.85	TRUE
	2	YICDNQDTISSKLK	3,Carbamidomethyl[C]#0;12,HTL_AC_azide#0;	0.00241	1899.92	1899.92	0.0019	1	TRUE
	2	YICDNQDTISSKLK	3,Carbamidomethyl[C]#0;12,HTL_AC_azide#0;	0.00767	1899.92	1899.92	0.00414	2.18	TRUE
	3	YICDNQDTISSKLK	3,Carbamidomethyl[C]#0;12,HTL_AC_azide#0;	0.00845	1899.92	1899.92	0.00401	2.11	TRUE
	3	YICDNQDTISSKLK	3,Carbamidomethyl[C]#0;12,HTL_AC_azide#0;	0.0309	1899.92	1899.92	0.00245	1.29	TRUE
	2	YICDNQDTISSKLK	3,Carbamidomethyl[C]#0;12,HTL_AC_azide#0;	0.0918	1899.92	1899.92	0.00426	2.24	TRUE
	2	YICDNQDTISSKLK	3,Carbamidomethyl[C]#0;12,HTL_AC_azide#0;	0.0997	1899.92	1899.92	0.00448	2.36	TRUE
	3	RPCFSALTPDETYVPKAFDEK	3,Carbamidomethyl[C]#0;16,HTL_AC_azide#0;	0.000165	2686.3	2686.29	0.00744	2.77	TRUE
	4	RPCFSALTPDETYVPKAFDEK	3,Carbamidomethyl[C]#0;16,HTL_AC_azide#0;	0.000217	2686.3	2686.29	0.00676	2.52	TRUE
	2	RPCFSALTPDETYVPKAFDEK	3,Carbamidomethyl[C]#0;16,HTL_AC_azide#0;	0.000266	2686.3	2686.29	0.00709	2.64	TRUE
	4	RPCFSALTPDETYVPKAFDEK	3,Carbamidomethyl[C]#0;16,HTL_AC_azide#0;	0.00047	2686.3	2686.29	0.00699	2.6	TRUE
	3	RPCFSALTPDETYVPKAFDEK	3,Carbamidomethyl[C]#0;16,HTL_AC_azide#0;	0.000953	2686.3	2686.29	0.0104	3.87	TRUE
	2	RPCFSALTPDETYVPKAFDEK	3,Carbamidomethyl[C]#0;16,HTL_AC_azide#0;	0.00636	2686.3	2686.29	0.00955	3.55	TRUE
	3	RPCFSALTPDETYVPKAFDEK	3,Carbamidomethyl[C]#0;16,HTL_AC_azide#0;	0.021	2686.29	2686.29	0.00552	2.05	TRUE
	4	RPCFSALTPDETYVPKAFDEK	3,Carbamidomethyl[C]#0;16,HTL_AC_azide#0;	0.0234	2686.3	2686.29	0.00659	2.45	TRUE
	2	RPCFSALTPDETYVPKAFDEK	3,Carbamidomethyl[C]#0;16,HTL_AC_azide#0;	0.0352	2686.3	2686.29	0.00798	2.97	TRUE
	3	RPCFSALTPDETYVPKAFDEK	3,Carbamidomethyl[C]#0;16,HTL_AC_azide#0;	0.106	2686.28	2686.29	-0.00944	-3.51	TRUE
	3	RPCFSALTPDETYVPKAFDEK	3,Carbamidomethyl[C]#0;16,HTL_AC_azide#0;	0.14	2686.3	2686.29	0.0062	2.31	TRUE
	3	RPCFSALTPDETYVPKAFDEK	3,Carbamidomethyl[C]#0;16,HTL_AC_azide#0;	0.31	2686.3	2686.29	0.01216	4.53	TRUE
	4	SHCIAEVEKDAIPENLPPLTADFAEDKDVCK	3,Carbamidomethyl[C]#0;27,HTL_AC_azide#0;	0.0308	3669.82	3669.75	0.07104	19.36	TRUE
	3	SHCIAEVEKDAIPENLPPLTADFAEDKDVCK	3,Carbamidomethyl[C]#0;27,HTL_AC_azide#0;30,Carbamidomethyl[C]#0;	2.75e-08	3726.78	3726.77	0.0103	2.76	TRUE
	2	GACLLPKIETMR	3,Carbamidomethyl[C]#0;7,HTL_AC_azide#0;	0.000641	1603.84	1603.84	0.00535	3.34	TRUE
	2	GACLLPKIETMR	3,Carbamidomethyl[C]#0;7,HTL_AC_azide#0;	0.00156	1603.84	1603.84	0.00194	1.21	TRUE
	2	GACLLPKIETMR	3,Carbamidomethyl[C]#0;7,HTL_AC_azide#0;	0.00248	1603.84	1603.84	0.0021	1.31	TRUE
	2	GACLLPKIETMR	3,Carbamidomethyl[C]#0;7,HTL_AC_azide#0;	0.00294	1603.84	1603.84	0.00245	1.53	TRUE
	2	GACLLPKIETMR	3,Carbamidomethyl[C]#0;7,HTL_AC_azide#0;	0.00858	1603.84	1603.84	0.00372	2.32	TRUE
	3	GACLLPKIETMR	3,Carbamidomethyl[C]#0;7,HTL_AC_azide#0;	0.00868	1603.84	1603.84	0.00435	2.71	TRUE
	2	GACLLPKIETMR	3,Carbamidomethyl[C]#0;7,HTL_AC_azide#0;	0.00995	1603.84	1603.84	0.00242	1.51	TRUE
	2	GACLLPKIETMR	3,Carbamidomethyl[C]#0;7,HTL_AC_azide#0;	0.0123	1603.84	1603.84	0.00251	1.56	TRUE
	2	GACLLPKIETMR	3,Carbamidomethyl[C]#0;7,HTL_AC_azide#0;	0.0139	1603.84	1603.84	0.0005	0.31	TRUE
	3	GACLLPKIETMR	3,Carbamidomethyl[C]#0;7,HTL_AC_azide#0;	0.0206	1603.84	1603.84	0.00558	3.48	TRUE
	3	GACLLPKIETMR	3,Carbamidomethyl[C]#0;7,HTL_AC_azide#0;	0.0233	1603.84	1603.84	0.00263	1.64	TRUE
	3	GACLLPKIETMR	3,Carbamidomethyl[C]#0;7,HTL_AC_azide#0;	0.0287	1603.84	1603.84	0.00686	4.28	TRUE
	3	GACLLPKIETMR	3,Carbamidomethyl[C]#0;7,HTL_AC_azide#0;	0.0347	1603.84	1603.84	0.00619	3.86	TRUE
	2	GACLLPKIETMR	3,Carbamidomethyl[C]#0;7,HTL_AC_azide#0;	0.0414	1603.84	1603.84	0.0011	0.69	TRUE
	3	GACLLPKIETMR	3,Carbamidomethyl[C]#0;7,HTL_AC_azide#0;	0.0424	1603.84	1603.84	0.00369	2.3	TRUE
	2	GACLLPKIETMR	3,Carbamidomethyl[C]#0;7,HTL_AC_azide#0;	0.0432	1603.84	1603.84	0.00206	1.29	TRUE
	3	GACLLPKIETMR	3,Carbamidomethyl[C]#0;7,HTL_AC_azide#0;	0.0469	1603.84	1603.84	0.00326	2.04	TRUE
	2	GACLLPKIETMR	3,Carbamidomethyl[C]#0;7,HTL_AC_azide#0;	0.0586	1603.84	1603.84	0.00735	4.58	TRUE
	3	GACLLPKIETMR	3,Carbamidomethyl[C]#0;7,HTL_AC_azide#0;	0.0822	1603.84	1603.84	0.00442	2.75	TRUE
	3	GACLLPKIETMR	3,Carbamidomethyl[C]#0;7,HTL_AC_azide#0;	0.205	1603.84	1603.84	0.008	4.98	TRUE
	3	GACLLPKIETMR	3,Carbamidomethyl[C]#0;7,HTL_AC_azide#0;	0.349	1603.85	1603.84	0.0089	5.55	TRUE
	3	GACLLPKIETMR	3,Carbamidomethyl[C]#0;7,HTL_AC_azide#0;	0.378	1603.85	1603.84	0.01104	6.89	TRUE
	2	QNCDQFEKLGEYGFQNALIVR	3,Carbamidomethyl[C]#0;8,HTL_AC_azide#0;	1.64e-08	2744.33	2744.32	0.00913	3.33	TRUE
	2	QNCDQFEKLGEYGFQNALIVR	3,Carbamidomethyl[C]#0;8,HTL_AC_azide#0;	1.27e-07	2744.32	2744.32	0.00725	2.64	TRUE
	3	QNCDQFEKLGEYGFQNALIVR	3,Carbamidomethyl[C]#0;8,HTL_AC_azide#0;	1.92e-07	2744.32	2744.32	0.00631	2.3	TRUE
	3	QNCDQFEKLGEYGFQNALIVR	3,Carbamidomethyl[C]#0;8,HTL_AC_azide#0;	3.03e-07	2744.33	2744.32	0.00862	3.14	TRUE
	3	QNCDQFEKLGEYGFQNALIVR	3,Carbamidomethyl[C]#0;8,HTL_AC_azide#0;	6.23e-07	2744.32	2744.32	0.00597	2.18	TRUE
	3	QNCDQFEKLGEYGFQNALIVR	3,Carbamidomethyl[C]#0;8,HTL_AC_azide#0;	1.31e-06	2744.32	2744.32	0.00435	1.58	TRUE
	3	QNCDQFEKLGEYGFQNALIVR	3,Carbamidomethyl[C]#0;8,HTL_AC_azide#0;	1.31e-06	2744.3	2744.32	-0.01375	-5.01	TRUE
	3	QNCDQFEKLGEYGFQNALIVR	3,Carbamidomethyl[C]#0;8,HTL_AC_azide#0;	1.84e-06	2744.33	2744.32	0.0097	3.53	TRUE
	3	QNCDQFEKLGEYGFQNALIVR	3,Carbamidomethyl[C]#0;8,HTL_AC_azide#0;	2.98e-06	2744.32	2744.32	0.00704	2.56	TRUE
	2	QNCDQFEKLGEYGFQNALIVR	3,Carbamidomethyl[C]#0;8,HTL_AC_azide#0;	3.61e-06	2744.33	2744.32	0.01325	4.83	TRUE
	3	QNCDQFEKLGEYGFQNALIVR	3,Carbamidomethyl[C]#0;8,HTL_AC_azide#0;	4.86e-06	2744.32	2744.32	-0.00166	-0.61	TRUE
	3	QNCDQFEKLGEYGFQNALIVR	3,Carbamidomethyl[C]#0;8,HTL_AC_azide#0;	5.01e-06	2744.32	2744.32	0.0022	0.8	TRUE
	3	QNCDQFEKLGEYGFQNALIVR	3,Carbamidomethyl[C]#0;8,HTL_AC_azide#0;	6.9e-06	2744.33	2744.32	0.01075	3.92	TRUE
	3	QNCDQFEKLGEYGFQNALIVR	3,Carbamidomethyl[C]#0;8,HTL_AC_azide#0;	9.46e-06	2744.32	2744.32	0.00223	0.81	TRUE
	3	QNCDQFEKLGEYGFQNALIVR	3,Carbamidomethyl[C]#0;8,HTL_AC_azide#0;	1.14e-05	2744.31	2744.32	-0.00201	-0.73	TRUE
	3	QNCDQFEKLGEYGFQNALIVR	3,Carbamidomethyl[C]#0;8,HTL_AC_azide#0;	2.17e-05	2744.31	2744.32	-0.01035	-3.77	TRUE
	3	QNCDQFEKLGEYGFQNALIVR	3,Carbamidomethyl[C]#0;8,HTL_AC_azide#0;	2.71e-05	2744.3	2744.32	-0.01623	-5.91	TRUE
	4	QNCDQFEKLGEYGFQNALIVR	3,Carbamidomethyl[C]#0;8,HTL_AC_azide#0;	2.75e-05	2744.32	2744.32	0.00706	2.57	TRUE
	3	QNCDQFEKLGEYGFQNALIVR	3,Carbamidomethyl[C]#0;8,HTL_AC_azide#0;	2.93e-05	2744.32	2744.32	0.0009	0.33	TRUE
	3	QNCDQFEKLGEYGFQNALIVR	3,Carbamidomethyl[C]#0;8,HTL_AC_azide#0;	2.98e-05	2744.33	2744.32	0.01075	3.92	TRUE
	3	QNCDQFEKLGEYGFQNALIVR	3,Carbamidomethyl[C]#0;8,HTL_AC_azide#0;	4.55e-05	2744.3	2744.32	-0.01921	-7	TRUE
	3	QNCDQFEKLGEYGFQNALIVR	3,Carbamidomethyl[C]#0;8,HTL_AC_azide#0;	6.46e-05	2744.29	2744.32	-0.02581	-9.4	TRUE
	3	QNCDQFEKLGEYGFQNALIVR	3,Carbamidomethyl[C]#0;8,HTL_AC_azide#0;	7.03e-05	2744.29	2744.32	-0.03	-10.93	TRUE
	3	QNCDQFEKLGEYGFQNALIVR	3,Carbamidomethyl[C]#0;8,HTL_AC_azide#0;	0.000103	2744.29	2744.32	-0.02762	-10.07	TRUE
	3	QNCDQFEKLGEYGFQNALIVR	3,Carbamidomethyl[C]#0;8,HTL_AC_azide#0;	0.000113	2744.29	2744.32	-0.02241	-8.17	TRUE
	3	QNCDQFEKLGEYGFQNALIVR	3,Carbamidomethyl[C]#0;8,HTL_AC_azide#0;	0.000124	2744.29	2744.32	-0.03079	-11.22	TRUE
	3	QNCDQFEKLGEYGFQNALIVR	3,Carbamidomethyl[C]#0;8,HTL_AC_azide#0;	0.000141	2744.29	2744.32	-0.02312	-8.42	TRUE
	3	QNCDQFEKLGEYGFQNALIVR	3,Carbamidomethyl[C]#0;8,HTL_AC_azide#0;	0.000201	2744.29	2744.32	-0.02932	-10.68	TRUE
	3	QNCDQFEKLGEYGFQNALIVR	3,Carbamidomethyl[C]#0;8,HTL_AC_azide#0;	0.000209	2744.29	2744.32	-0.02904	-10.58	TRUE
	3	QNCDQFEKLGEYGFQNALIVR	3,Carbamidomethyl[C]#0;8,HTL_AC_azide#0;	0.000318	2744.28	2744.32	-0.03325	-12.12	TRUE
	3	QNCDQFEKLGEYGFQNALIVR	3,Carbamidomethyl[C]#0;8,HTL_AC_azide#0;	0.000383	2744.28	2744.32	-0.03432	-12.5	TRUE
	3	QNCDQFEKLGEYGFQNALIVR	3,Carbamidomethyl[C]#0;8,HTL_AC_azide#0;	0.000651	2744.28	2744.32	-0.03893	-14.19	TRUE
	3	QNCDQFEKLGEYGFQNALIVR	3,Carbamidomethyl[C]#0;8,HTL_AC_azide#0;	0.000722	2744.29	2744.32	-0.02699	-9.84	TRUE
	4	QNCDQFEKLGEYGFQNALIVR	3,Carbamidomethyl[C]#0;8,HTL_AC_azide#0;	0.00151	2744.32	2744.32	0.00502	1.83	TRUE
	4	LRCASIQKFGER	3,Carbamidomethyl[C]#0;8,HTL_AC_azide#0;	0.00717	1679.87	1679.87	0.00222	1.32	TRUE
	3	QNCDQFEKLGEYGFQNALIVR	3,Carbamidomethyl[C]#0;8,HTL_AC_azide#0;	0.0159	2744.32	2744.32	0.00491	1.79	TRUE
	3	QNCDQFEKLGEYGFQNALIVR	3,Carbamidomethyl[C]#0;8,HTL_AC_azide#0;	0.0173	2744.31	2744.32	-0.00364	-1.33	TRUE
	4	QNCDQFEKLGEYGFQNALIVR	3,Carbamidomethyl[C]#0;8,HTL_AC_azide#0;	0.0246	2744.32	2744.32	0.00698	2.54	TRUE
	4	QNCDQFEKLGEYGFQNALIVR	3,Carbamidomethyl[C]#0;8,HTL_AC_azide#0;	0.0599	2744.32	2744.32	0.00728	2.65	TRUE
	2	LRCASIQKFGER	3,Carbamidomethyl[C]#0;8,HTL_AC_azide#0;	0.132	1679.87	1679.87	0.00232	1.38	TRUE
	3	QNCDQFEKLGEYGFQNALIVR	3,Carbamidomethyl[C]#0;8,HTL_AC_azide#0;	0.163	2744.3	2744.32	-0.01499	-5.46	TRUE
	4	LRCASIQKFGER	3,Carbamidomethyl[C]#0;8,HTL_AC_azide#0;	0.177	1679.88	1679.87	0.00342	2.04	TRUE
	3	QNCDQFEKLGEYGFQNALIVR	3,Carbamidomethyl[C]#0;8,HTL_AC_azide#0;	0.371	2744.28	2744.32	-0.03478	-12.67	TRUE
	4	SHCIAEVEKDAIPENLPPLTADFAEDKDVCK	3,Carbamidomethyl[C]#0;9,HTL_AC_azide#0;30,Carbamidomethyl[C]#0;	5.51e-09	3726.77	3726.77	0.00472	1.27	TRUE
	3	SHCIAEVEKDAIPENLPPLTADFAEDKDVCK	3,Carbamidomethyl[C]#0;9,HTL_AC_azide#0;30,Carbamidomethyl[C]#0;	5.79e-08	3726.78	3726.77	0.01095	2.94	TRUE
	4	SHCIAEVEKDAIPENLPPLTADFAEDKDVCK	3,Carbamidomethyl[C]#0;9,HTL_AC_azide#0;30,Carbamidomethyl[C]#0;	1.82e-07	3726.78	3726.77	0.00871	2.34	TRUE
	4	SHCIAEVEKDAIPENLPPLTADFAEDKDVCK	3,Carbamidomethyl[C]#0;9,HTL_AC_azide#0;30,Carbamidomethyl[C]#0;	6.19e-07	3726.78	3726.77	0.00623	1.67	TRUE
	5	SHCIAEVEKDAIPENLPPLTADFAEDKDVCK	3,Carbamidomethyl[C]#0;9,HTL_AC_azide#0;30,Carbamidomethyl[C]#0;	4.48e-06	3726.77	3726.77	0.00489	1.31	TRUE
	3	SHCIAEVEKDAIPENLPPLTADFAEDKDVCK	3,Carbamidomethyl[C]#0;9,HTL_AC_azide#0;30,Carbamidomethyl[C]#0;	3.79e-05	3726.78	3726.77	0.01067	2.86	TRUE
	3	VTKCCTESLVNR	3,HTL_AC_azide#0;	0.0868	1567.76	1567.76	-0.00873	-5.57	TRUE
	2	ALKAWSVAR	3,HTL_AC_azide#0;	0.00698	1216.69	1216.69	0.00464	3.81	TRUE
	3	ALKAWSVAR	3,HTL_AC_azide#0;	0.00821	1216.69	1216.69	0.00244	2.01	TRUE
	2	ALKAWSVAR	3,HTL_AC_azide#0;	0.0118	1216.68	1216.69	-0.00352	-2.89	TRUE
	3	QIKKQTALVELLK	3,HTL_AC_azide#0;	0.0181	1727.05	1727.05	0.00248	1.44	TRUE
	2	THKSEIAHR	3,HTL_AC_azide#0;	0.0194	1293.67	1293.67	0.00069	0.53	TRUE
	2	ALKAWSVAR	3,HTL_AC_azide#0;	0.0236	1216.69	1216.69	0.00501	4.12	TRUE
	2	ALKAWSVAR	3,HTL_AC_azide#0;	0.0287	1216.69	1216.69	0.00564	4.64	TRUE
	3	ALKAWSVAR	3,HTL_AC_azide#0;	0.0339	1216.69	1216.69	0.00114	0.94	TRUE
	2	ALKAWSVAR	3,HTL_AC_azide#0;	0.0356	1216.69	1216.69	0.00423	3.48	TRUE
	3	ALKAWSVAR	3,HTL_AC_azide#0;	0.0404	1216.68	1216.69	-0.00629	-5.17	TRUE
	3	THKSEIAHR	3,HTL_AC_azide#0;	0.0457	1293.67	1293.67	0.00056	0.43	TRUE
	2	ALKAWSVAR	3,HTL_AC_azide#0;	0.046	1216.69	1216.69	0.00277	2.27	TRUE
	2	ALKAWSVAR	3,HTL_AC_azide#0;	0.0464	1216.69	1216.69	0.00798	6.56	TRUE
	2	ALKAWSVAR	3,HTL_AC_azide#0;	0.0545	1216.69	1216.69	0.00531	4.36	TRUE
	2	ALKAWSVAR	3,HTL_AC_azide#0;	0.0548	1216.69	1216.69	0.00218	1.79	TRUE
	2	ALKAWSVAR	3,HTL_AC_azide#0;	0.0567	1216.69	1216.69	0.00231	1.9	TRUE
	3	THKSEIAHR	3,HTL_AC_azide#0;	0.065	1293.67	1293.67	-0.0006	-0.46	TRUE
	3	THKSEIAHR	3,HTL_AC_azide#0;	0.0708	1293.67	1293.67	-0.00026	-0.2	TRUE
	3	THKSEIAHR	3,HTL_AC_azide#0;	0.0789	1293.67	1293.67	0.00123	0.95	TRUE
	3	THKSEIAHR	3,HTL_AC_azide#0;	0.0789	1293.67	1293.67	0.00173	1.33	TRUE
	3	THKSEIAHR	3,HTL_AC_azide#0;	0.0996	1293.67	1293.67	0.00168	1.3	TRUE
	2	ALKAWSVAR	3,HTL_AC_azide#0;	0.108	1216.69	1216.69	0.00296	2.43	TRUE
	3	THKSEIAHR	3,HTL_AC_azide#0;	0.112	1293.67	1293.67	0.00082	0.63	TRUE
	3	THKSEIAHR	3,HTL_AC_azide#0;	0.114	1293.67	1293.67	0.00156	1.21	TRUE
	3	ALKAWSVAR	3,HTL_AC_azide#0;	0.119	1216.69	1216.69	0.00308	2.53	TRUE
	3	THKSEIAHR	3,HTL_AC_azide#0;	0.121	1293.69	1293.67	0.01739	13.44	TRUE
	3	THKSEIAHR	3,HTL_AC_azide#0;	0.121	1293.68	1293.67	0.00244	1.89	TRUE
	3	ALKAWSVAR	3,HTL_AC_azide#0;	0.131	1216.69	1216.69	0.00244	2.01	TRUE
	3	THKSEIAHR	3,HTL_AC_azide#0;	0.136	1293.67	1293.67	0.00129	1	TRUE
	3	ALKAWSVAR	3,HTL_AC_azide#0;	0.137	1216.69	1216.69	0.003	2.46	TRUE
	2	ALKAWSVAR	3,HTL_AC_azide#0;	0.143	1216.69	1216.69	0.00261	2.14	TRUE
	2	ALKAWSVAR	3,HTL_AC_azide#0;	0.145	1216.69	1216.69	0.00326	2.68	TRUE
	2	ALKAWSVAR	3,HTL_AC_azide#0;	0.145	1216.69	1216.69	0.00318	2.61	TRUE
	3	ALKAWSVAR	3,HTL_AC_azide#0;	0.165	1216.69	1216.69	0.00269	2.21	TRUE
	2	ALKAWSVAR	3,HTL_AC_azide#0;	0.166	1216.69	1216.69	0.00381	3.13	TRUE
	2	ALKAWSVAR	3,HTL_AC_azide#0;	0.178	1216.69	1216.69	0.00198	1.63	TRUE
	2	ALKAWSVAR	3,HTL_AC_azide#0;	0.179	1216.69	1216.69	0.00212	1.74	TRUE
	3	THKSEIAHR	3,HTL_AC_azide#0;	0.183	1293.68	1293.67	0.0041	3.17	TRUE
	2	ALKAWSVAR	3,HTL_AC_azide#0;	0.185	1216.69	1216.69	0.00209	1.72	TRUE
	2	ALKAWSVAR	3,HTL_AC_azide#0;	0.189	1216.69	1216.69	0.00309	2.54	TRUE
	2	ALKAWSVAR	3,HTL_AC_azide#0;	0.191	1216.69	1216.69	0.00211	1.73	TRUE
	2	ALKAWSVAR	3,HTL_AC_azide#0;	0.191	1216.69	1216.69	0.00301	2.48	TRUE
	2	ALKAWSVAR	3,HTL_AC_azide#0;	0.193	1216.69	1216.69	0.00195	1.6	TRUE
	2	ALKAWSVAR	3,HTL_AC_azide#0;	0.193	1216.69	1216.69	0.00469	3.86	TRUE
	2	ALKAWSVAR	3,HTL_AC_azide#0;	0.196	1216.69	1216.69	0.00391	3.21	TRUE
	2	ALKAWSVAR	3,HTL_AC_azide#0;	0.197	1216.69	1216.69	0.00592	4.87	TRUE
	2	ALKAWSVAR	3,HTL_AC_azide#0;	0.198	1216.69	1216.69	0.0043	3.53	TRUE
	2	ALKAWSVAR	3,HTL_AC_azide#0;	0.205	1216.69	1216.69	0.00261	2.14	TRUE
	2	ALKAWSVAR	3,HTL_AC_azide#0;	0.209	1216.69	1216.69	0.00579	4.75	TRUE
	3	RFKDLGEEHFK	3,HTL_AC_azide#0;	0.218	1620.84	1620.82	0.01584	9.77	TRUE
	3	ALKAWSVAR	3,HTL_AC_azide#0;	0.224	1216.69	1216.69	0.002	1.65	TRUE
	2	ALKAWSVAR	3,HTL_AC_azide#0;	0.226	1216.69	1216.69	0.00576	4.74	TRUE
	2	ALKAWSVAR	3,HTL_AC_azide#0;	0.228	1216.69	1216.69	0.00512	4.21	TRUE
	2	ALKAWSVAR	3,HTL_AC_azide#0;	0.238	1216.69	1216.69	0.00456	3.74	TRUE
	2	ALKAWSVAR	3,HTL_AC_azide#0;	0.248	1216.69	1216.69	0.00272	2.24	TRUE
	2	ALKAWSVAR	3,HTL_AC_azide#0;	0.252	1216.69	1216.69	0.00492	4.04	TRUE
	3	THKSEIAHR	3,HTL_AC_azide#0;	0.26	1293.67	1293.67	-0.0023	-1.78	TRUE
	3	THKSEIAHR	3,HTL_AC_azide#0;	0.276	1293.67	1293.67	-0.0001	-0.07	TRUE
	2	ALKAWSVAR	3,HTL_AC_azide#0;	0.281	1216.69	1216.69	0.00219	1.8	TRUE
	2	ALKAWSVAR	3,HTL_AC_azide#0;	0.285	1216.69	1216.69	0.0056	4.6	TRUE
	2	ALKAWSVAR	3,HTL_AC_azide#0;	0.292	1216.69	1216.69	0.00209	1.72	TRUE
	2	ALKAWSVAR	3,HTL_AC_azide#0;	0.293	1216.69	1216.69	0.00617	5.07	TRUE
	3	ALKAWSVAR	3,HTL_AC_azide#0;	0.296	1216.69	1216.69	0.00219	1.8	TRUE
	2	ALKAWSVAR	3,HTL_AC_azide#0;	0.303	1216.69	1216.69	0.00121	1	TRUE
	2	ALKAWSVAR	3,HTL_AC_azide#0;	0.313	1216.69	1216.69	0.0054	4.43	TRUE
	2	ALKAWSVAR	3,HTL_AC_azide#0;	0.319	1216.69	1216.69	0.00509	4.19	TRUE
	2	ALKAWSVAR	3,HTL_AC_azide#0;	0.329	1216.69	1216.69	0.0034	2.8	TRUE
	2	ALKAWSVAR	3,HTL_AC_azide#0;	0.363	1216.69	1216.69	0.00495	4.07	TRUE
	3	THKSEIAHR	3,HTL_AC_azide#0;	0.364	1293.65	1293.67	-0.01981	-15.31	TRUE
	2	ALKAWSVAR	3,HTL_AC_azide#0;	0.372	1216.69	1216.69	0.00252	2.07	TRUE
	2	ALKAWSVAR	3,HTL_AC_azide#0;	0.388	1216.69	1216.69	0.00603	4.96	TRUE
	2	ALKAWSVAR	3,HTL_AC_azide#0;	0.392	1216.69	1216.69	0.00554	4.56	TRUE
	2	ALKAWSVAR	3,HTL_AC_azide#0;	0.415	1216.69	1216.69	0.00344	2.83	TRUE
	2	LAKEYEATLEECCAK	3,HTL_AC_azide#0;12,Carbamidomethyl[C]#0;13,Carbamidomethyl[C]#0;	3.11e-06	2029.93	2029.93	0.00518	2.55	TRUE
	2	LAKEYEATLEECCAK	3,HTL_AC_azide#0;12,Carbamidomethyl[C]#0;13,Carbamidomethyl[C]#0;	7.21e-06	2029.93	2029.93	-0.0025	-1.23	TRUE
	3	LAKEYEATLEECCAK	3,HTL_AC_azide#0;12,Carbamidomethyl[C]#0;13,Carbamidomethyl[C]#0;	7.57e-06	2029.93	2029.93	0.0051	2.51	TRUE
	2	LAKEYEATLEECCAK	3,HTL_AC_azide#0;12,Carbamidomethyl[C]#0;13,Carbamidomethyl[C]#0;	3.18e-05	2029.93	2029.93	0.00496	2.44	TRUE
	3	LAKEYEATLEECCAK	3,HTL_AC_azide#0;12,Carbamidomethyl[C]#0;13,Carbamidomethyl[C]#0;	3.7e-05	2029.93	2029.93	0.00656	3.23	TRUE
	2	LAKEYEATLEECCAK	3,HTL_AC_azide#0;12,Carbamidomethyl[C]#0;13,Carbamidomethyl[C]#0;	7e-05	2029.93	2029.93	-0.00274	-1.35	TRUE
	2	LAKEYEATLEECCAK	3,HTL_AC_azide#0;12,Carbamidomethyl[C]#0;13,Carbamidomethyl[C]#0;	8.34e-05	2029.93	2029.93	-0.00168	-0.83	TRUE
	3	LAKEYEATLEECCAK	3,HTL_AC_azide#0;12,Carbamidomethyl[C]#0;13,Carbamidomethyl[C]#0;	0.000159	2029.93	2029.93	0.00259	1.28	TRUE
	2	LAKEYEATLEECCAK	3,HTL_AC_azide#0;12,Carbamidomethyl[C]#0;13,Carbamidomethyl[C]#0;	0.000199	2029.93	2029.93	0.00694	3.42	TRUE
	3	LAKEYEATLEECCAK	3,HTL_AC_azide#0;12,Carbamidomethyl[C]#0;13,Carbamidomethyl[C]#0;	0.00021	2029.93	2029.93	0.00385	1.9	TRUE
	2	LAKEYEATLEECCAK	3,HTL_AC_azide#0;12,Carbamidomethyl[C]#0;13,Carbamidomethyl[C]#0;	0.000572	2029.93	2029.93	0.0015	0.74	TRUE
	3	LAKEYEATLEECCAK	3,HTL_AC_azide#0;12,Carbamidomethyl[C]#0;13,Carbamidomethyl[C]#0;	0.000867	2029.93	2029.93	0.00319	1.57	TRUE
	3	LAKEYEATLEECCAK	3,HTL_AC_azide#0;12,Carbamidomethyl[C]#0;13,Carbamidomethyl[C]#0;	0.00114	2029.93	2029.93	0.00479	2.36	TRUE
	3	LAKEYEATLEECCAK	3,HTL_AC_azide#0;12,Carbamidomethyl[C]#0;13,Carbamidomethyl[C]#0;	0.00266	2029.93	2029.93	0.00284	1.4	TRUE
	2	LAKEYEATLEECCAK	3,HTL_AC_azide#0;12,Carbamidomethyl[C]#0;13,Carbamidomethyl[C]#0;	0.00296	2029.91	2029.93	-0.01672	-8.24	TRUE
	2	LAKEYEATLEECCAK	3,HTL_AC_azide#0;12,Carbamidomethyl[C]#0;13,Carbamidomethyl[C]#0;	0.00448	2029.92	2029.93	-0.00828	-4.08	TRUE
	2	LAKEYEATLEECCAK	3,HTL_AC_azide#0;12,Carbamidomethyl[C]#0;13,Carbamidomethyl[C]#0;	0.00515	2029.93	2029.93	0.00454	2.24	TRUE
	3	LAKEYEATLEECCAK	3,HTL_AC_azide#0;12,Carbamidomethyl[C]#0;13,Carbamidomethyl[C]#0;	0.00678	2029.91	2029.93	-0.02076	-10.23	TRUE
	2	LAKEYEATLEECCAK	3,HTL_AC_azide#0;12,Carbamidomethyl[C]#0;13,Carbamidomethyl[C]#0;	0.155	2029.92	2029.93	-0.00483	-2.38	TRUE
	4	VHKECCHGDLLECADDRADLAK	3,HTL_AC_azide#0;13,Carbamidomethyl[C]#0;	6.62e-05	2713.25	2713.22	0.03281	12.09	TRUE
	4	VHKECCHGDLLECADDRADLAK	3,HTL_AC_azide#0;13,Carbamidomethyl[C]#0;	8.1e-05	2713.26	2713.22	0.03594	13.25	TRUE
	5	VHKECCHGDLLECADDRADLAK	3,HTL_AC_azide#0;13,Carbamidomethyl[C]#0;	0.000124	2713.25	2713.22	0.03394	12.51	TRUE
	5	VHKECCHGDLLECADDRADLAK	3,HTL_AC_azide#0;13,Carbamidomethyl[C]#0;	0.000168	2713.25	2713.22	0.03429	12.64	TRUE
	4	VHKECCHGDLLECADDRADLAK	3,HTL_AC_azide#0;13,Carbamidomethyl[C]#0;	0.000487	2713.25	2713.22	0.03495	12.88	TRUE
	3	VHKECCHGDLLECADDR	3,HTL_AC_azide#0;13,Carbamidomethyl[C]#0;	0.000525	2214.97	2214.94	0.03369	15.21	TRUE
	3	VHKECCHGDLLECADDRADLAK	3,HTL_AC_azide#0;13,Carbamidomethyl[C]#0;	0.00225	2713.25	2713.22	0.03475	12.81	TRUE
	3	VHKECCHGDLLECADDRADLAK	3,HTL_AC_azide#0;13,Carbamidomethyl[C]#0;	0.00347	2713.27	2713.22	0.047	17.32	TRUE
	3	VHKECCHGDLLECADDRADLAK	3,HTL_AC_azide#0;13,Carbamidomethyl[C]#0;	0.00364	2713.25	2713.22	0.03105	11.44	TRUE
	4	VHKECCHGDLLECADDR	3,HTL_AC_azide#0;13,Carbamidomethyl[C]#0;	0.0174	2214.97	2214.94	0.03443	15.54	TRUE
	3	VHKECCHGDLLECADDR	3,HTL_AC_azide#0;13,Carbamidomethyl[C]#0;	0.0185	2214.98	2214.94	0.04125	18.62	TRUE
	4	VHKECCHGDLLECADDRADLAK	3,HTL_AC_azide#0;13,Carbamidomethyl[C]#0;	0.0396	2713.26	2713.22	0.0378	13.93	TRUE
	4	VHKECCHGDLLECADDRADLAK	3,HTL_AC_azide#0;13,Carbamidomethyl[C]#0;	0.0455	2713.26	2713.22	0.04394	16.19	TRUE
	5	VHKECCHGDLLECADDRADLAK	3,HTL_AC_azide#0;13,Carbamidomethyl[C]#0;	0.0549	2713.26	2713.22	0.0447	16.47	TRUE
	4	VHKECCHGDLLECADDRADLAK	3,HTL_AC_azide#0;13,Carbamidomethyl[C]#0;	0.107	2713.26	2713.22	0.03686	13.59	TRUE
	3	VHKECCHGDLLECADDRADLAK	3,HTL_AC_azide#0;13,Carbamidomethyl[C]#0;	0.133	2713.26	2713.22	0.0367	13.52	TRUE
	4	VHKECCHGDLLECADDR	3,HTL_AC_azide#0;13,Carbamidomethyl[C]#0;	0.19	2214.97	2214.94	0.03272	14.77	TRUE
	2	VTKCCTESLVNR	3,HTL_AC_azide#0;4,Carbamidomethyl[C]#0;5,Carbamidomethyl[C]#0;	5.67e-05	1681.81	1681.81	0.0024	1.43	TRUE
	2	VTKCCTESLVNR	3,HTL_AC_azide#0;4,Carbamidomethyl[C]#0;5,Carbamidomethyl[C]#0;	9.28e-05	1681.81	1681.81	0.00103	0.61	TRUE
	2	VTKCCTESLVNR	3,HTL_AC_azide#0;4,Carbamidomethyl[C]#0;5,Carbamidomethyl[C]#0;	0.000104	1681.81	1681.81	0.00337	2	TRUE
	3	VTKCCTESLVNR	3,HTL_AC_azide#0;4,Carbamidomethyl[C]#0;5,Carbamidomethyl[C]#0;	0.000109	1681.81	1681.81	0.00188	1.12	TRUE
	2	VTKCCTESLVNR	3,HTL_AC_azide#0;4,Carbamidomethyl[C]#0;5,Carbamidomethyl[C]#0;	0.000114	1681.81	1681.81	0.00339	2.02	TRUE
	2	VTKCCTESLVNR	3,HTL_AC_azide#0;4,Carbamidomethyl[C]#0;5,Carbamidomethyl[C]#0;	0.000121	1681.81	1681.81	0.00223	1.32	TRUE
	2	VTKCCTESLVNR	3,HTL_AC_azide#0;4,Carbamidomethyl[C]#0;5,Carbamidomethyl[C]#0;	0.000181	1681.81	1681.81	0.00164	0.98	TRUE
	2	VTKCCTESLVNR	3,HTL_AC_azide#0;4,Carbamidomethyl[C]#0;5,Carbamidomethyl[C]#0;	0.00033	1681.81	1681.81	0.00148	0.88	TRUE
	3	VTKCCTESLVNR	3,HTL_AC_azide#0;4,Carbamidomethyl[C]#0;5,Carbamidomethyl[C]#0;	0.000506	1681.81	1681.81	0.00318	1.89	TRUE
	2	VTKCCTESLVNR	3,HTL_AC_azide#0;4,Carbamidomethyl[C]#0;5,Carbamidomethyl[C]#0;	0.000635	1681.81	1681.81	0.0025	1.49	TRUE
	3	VTKCCTESLVNR	3,HTL_AC_azide#0;4,Carbamidomethyl[C]#0;5,Carbamidomethyl[C]#0;	0.000691	1681.81	1681.81	0.00329	1.96	TRUE
	3	VTKCCTESLVNR	3,HTL_AC_azide#0;4,Carbamidomethyl[C]#0;5,Carbamidomethyl[C]#0;	0.000713	1681.81	1681.81	0.00283	1.68	TRUE
	3	VTKCCTESLVNR	3,HTL_AC_azide#0;4,Carbamidomethyl[C]#0;5,Carbamidomethyl[C]#0;	0.000776	1681.81	1681.81	0.00209	1.24	TRUE
	2	VTKCCTESLVNR	3,HTL_AC_azide#0;4,Carbamidomethyl[C]#0;5,Carbamidomethyl[C]#0;	0.000868	1681.81	1681.81	0.00404	2.4	TRUE
	3	VTKCCTESLVNR	3,HTL_AC_azide#0;4,Carbamidomethyl[C]#0;5,Carbamidomethyl[C]#0;	0.000889	1681.81	1681.81	0.00392	2.33	TRUE
	2	VTKCCTESLVNR	3,HTL_AC_azide#0;4,Carbamidomethyl[C]#0;5,Carbamidomethyl[C]#0;	0.000944	1681.81	1681.81	0.00091	0.54	TRUE
	3	VTKCCTESLVNR	3,HTL_AC_azide#0;4,Carbamidomethyl[C]#0;5,Carbamidomethyl[C]#0;	0.000948	1681.81	1681.81	0.00297	1.77	TRUE
	2	VTKCCTESLVNR	3,HTL_AC_azide#0;4,Carbamidomethyl[C]#0;5,Carbamidomethyl[C]#0;	0.00144	1681.81	1681.81	-0.00108	-0.64	TRUE
	3	VTKCCTESLVNR	3,HTL_AC_azide#0;4,Carbamidomethyl[C]#0;5,Carbamidomethyl[C]#0;	0.00164	1681.81	1681.81	0.00383	2.28	TRUE
	3	VTKCCTESLVNR	3,HTL_AC_azide#0;4,Carbamidomethyl[C]#0;5,Carbamidomethyl[C]#0;	0.00169	1681.81	1681.81	0.0043	2.55	TRUE
	2	VTKCCTESLVNR	3,HTL_AC_azide#0;4,Carbamidomethyl[C]#0;5,Carbamidomethyl[C]#0;	0.00208	1681.81	1681.81	0.00233	1.38	TRUE
	3	VTKCCTESLVNR	3,HTL_AC_azide#0;4,Carbamidomethyl[C]#0;5,Carbamidomethyl[C]#0;	0.00214	1681.81	1681.81	0.00262	1.56	TRUE
	3	VTKCCTESLVNR	3,HTL_AC_azide#0;4,Carbamidomethyl[C]#0;5,Carbamidomethyl[C]#0;	0.00236	1681.81	1681.81	0.00382	2.27	TRUE
	2	VTKCCTESLVNR	3,HTL_AC_azide#0;4,Carbamidomethyl[C]#0;5,Carbamidomethyl[C]#0;	0.00272	1681.81	1681.81	0.00218	1.3	TRUE
	3	VTKCCTESLVNR	3,HTL_AC_azide#0;4,Carbamidomethyl[C]#0;5,Carbamidomethyl[C]#0;	0.00471	1681.82	1681.81	0.01068	6.35	TRUE
	3	VTKCCTESLVNR	3,HTL_AC_azide#0;4,Carbamidomethyl[C]#0;5,Carbamidomethyl[C]#0;	0.00489	1681.83	1681.81	0.01893	11.26	TRUE
	3	VTKCCTESLVNR	3,HTL_AC_azide#0;4,Carbamidomethyl[C]#0;5,Carbamidomethyl[C]#0;	0.00585	1681.81	1681.81	0.00089	0.53	TRUE
	3	VTKCCTESLVNR	3,HTL_AC_azide#0;4,Carbamidomethyl[C]#0;5,Carbamidomethyl[C]#0;	0.0102	1681.81	1681.81	0.00269	1.6	TRUE
	3	VTKCCTESLVNR	3,HTL_AC_azide#0;4,Carbamidomethyl[C]#0;5,Carbamidomethyl[C]#0;	0.0136	1681.81	1681.81	0.00482	2.87	TRUE
	2	VTKCCTESLVNR	3,HTL_AC_azide#0;4,Carbamidomethyl[C]#0;5,Carbamidomethyl[C]#0;	0.0236	1681.81	1681.81	0.00198	1.18	TRUE
	2	VTKCCTESLVNR	3,HTL_AC_azide#0;4,Carbamidomethyl[C]#0;5,Carbamidomethyl[C]#0;	0.0409	1681.81	1681.81	0.00202	1.2	TRUE
	2	VTKCCTESLVNR	3,HTL_AC_azide#0;4,Carbamidomethyl[C]#0;5,Carbamidomethyl[C]#0;	0.0428	1681.81	1681.81	-0.00099	-0.59	TRUE
	2	VTKCCTESLVNR	3,HTL_AC_azide#0;4,Carbamidomethyl[C]#0;5,Carbamidomethyl[C]#0;	0.0569	1681.81	1681.81	0	0	TRUE
	3	VTKCCTESLVNR	3,HTL_AC_azide#0;4,Carbamidomethyl[C]#0;5,Carbamidomethyl[C]#0;	0.106	1681.83	1681.81	0.02017	11.99	TRUE
	2	VTKCCTESLVNR	3,HTL_AC_azide#0;4,Carbamidomethyl[C]#0;5,Carbamidomethyl[C]#0;	0.154	1681.81	1681.81	0.00147	0.88	TRUE
	3	VTKCCTESLVNR	3,HTL_AC_azide#0;4,Carbamidomethyl[C]#0;5,Carbamidomethyl[C]#0;	0.195	1681.82	1681.81	0.01466	8.72	TRUE
	2	QIKKQTALVELLK	3,HTL_AC_azide#0;4,HTL_AC_azide#0;	0.000132	1942.15	1942.15	0.00508	2.62	TRUE
	3	QIKKQTALVELLK	3,HTL_AC_azide#0;4,HTL_AC_azide#0;	0.00124	1942.15	1942.15	0.00491	2.53	TRUE
	3	QIKKQTALVELLK	3,HTL_AC_azide#0;4,HTL_AC_azide#0;	0.00136	1942.15	1942.15	0.00521	2.68	TRUE
	4	QIKKQTALVELLK	3,HTL_AC_azide#0;4,HTL_AC_azide#0;	0.00141	1942.15	1942.15	0.00387	1.99	TRUE
	4	QIKKQTALVELLK	3,HTL_AC_azide#0;4,HTL_AC_azide#0;	0.00196	1942.15	1942.15	0.00619	3.19	TRUE
	3	QIKKQTALVELLK	3,HTL_AC_azide#0;4,HTL_AC_azide#0;	0.00211	1942.15	1942.15	0.00487	2.51	TRUE
	2	QIKKQTALVELLK	3,HTL_AC_azide#0;4,HTL_AC_azide#0;	0.308	1942.15	1942.15	0.00475	2.45	TRUE
	4	VHKECCHGDLLECADDRADLAK	3,HTL_AC_azide#0;5,Carbamidomethyl[C]#0;13,Carbamidomethyl[C]#0;	0.0743	2770.28	2770.24	0.0367	13.25	TRUE
	4	VHKECCHGDLLECADDRADLAK	3,HTL_AC_azide#0;6,Carbamidomethyl[C]#0;	0.000624	2713.25	2713.22	0.03291	12.13	TRUE
	4	VHKECCHGDLLECADDRADLAK	3,HTL_AC_azide#0;6,Carbamidomethyl[C]#0;13,Carbamidomethyl[C]#0;	0.000297	2770.23	2770.24	-0.01372	-4.95	TRUE
	4	VHKECCHGDLLECADDRADLAK	3,HTL_AC_azide#0;6,Carbamidomethyl[C]#0;13,Carbamidomethyl[C]#0;	0.0115	2770.25	2770.24	0.01132	4.08	TRUE
	3	TVMENFVAFVDKCCAADDKEACFAVEGPK	3,Oxidation[M]#0;12,HTL_AC_azide#0;22,Carbamidomethyl[C]#0;	1.18e-06	3425.58	3425.52	0.05316	15.52	TRUE
	4	TVMENFVAFVDKCCAADDKEACFAVEGPK	3,Oxidation[M]#0;12,HTL_AC_azide#0;22,Carbamidomethyl[C]#0;	5.67e-06	3425.57	3425.52	0.0496	14.48	TRUE
	4	TVMENFVAFVDKCCAADDKEACFAVEGPK	3,Oxidation[M]#0;12,HTL_AC_azide#0;22,Carbamidomethyl[C]#0;	3.02e-05	3425.51	3425.52	-0.01385	-4.04	TRUE
	4	TVMENFVAFVDKCCAADDKEACFAVEGPK	3,Oxidation[M]#0;12,HTL_AC_azide#0;22,Carbamidomethyl[C]#0;	0.00052	3425.56	3425.52	0.03949	11.53	TRUE
	4	TVMENFVAFVDKCCAADDKEACFAVEGPK	3,Oxidation[M]#0;12,HTL_AC_azide#0;22,Carbamidomethyl[C]#0;	0.000647	3425.56	3425.52	0.03421	9.99	TRUE
	4	TVMENFVAFVDKCCAADDKEACFAVEGPK	3,Oxidation[M]#0;12,HTL_AC_azide#0;22,Carbamidomethyl[C]#0;	0.00106	3425.55	3425.52	0.02639	7.71	TRUE
	3	TVMENFVAFVDKCCAADDKEACFAVEGPK	3,Oxidation[M]#0;12,HTL_AC_azide#0;22,Carbamidomethyl[C]#0;	0.0014	3425.57	3425.52	0.05169	15.09	TRUE
	4	TVMENFVAFVDKCCAADDKEACFAVEGPK	3,Oxidation[M]#0;12,HTL_AC_azide#0;22,Carbamidomethyl[C]#0;	0.00152	3425.55	3425.52	0.0287	8.38	TRUE
	3	TVMENFVAFVDKCCAADDKEACFAVEGPK	3,Oxidation[M]#0;12,HTL_AC_azide#0;22,Carbamidomethyl[C]#0;	0.0025	3425.57	3425.52	0.04637	13.54	TRUE
	4	TVMENFVAFVDKCCAADDKEACFAVEGPK	3,Oxidation[M]#0;12,HTL_AC_azide#0;22,Carbamidomethyl[C]#0;	0.006	3425.56	3425.52	0.03312	9.67	TRUE
	4	TVMENFVAFVDKCCAADDKEACFAVEGPK	3,Oxidation[M]#0;12,HTL_AC_azide#0;22,Carbamidomethyl[C]#0;	0.0106	3425.57	3425.52	0.04875	14.23	TRUE
	4	TVMENFVAFVDKCCAADDKEACFAVEGPK	3,Oxidation[M]#0;12,HTL_AC_azide#0;22,Carbamidomethyl[C]#0;	0.0192	3425.56	3425.52	0.03685	10.76	TRUE
	3	TVMENFVAFVDKCCAADDKEACFAVEGPK	3,Oxidation[M]#0;12,HTL_AC_azide#0;22,Carbamidomethyl[C]#0;	0.0374	3425.58	3425.52	0.05262	15.36	TRUE
	3	TVMENFVAFVDKCCAADDKEACFAVEGPK	3,Oxidation[M]#0;12,HTL_AC_azide#0;22,Carbamidomethyl[C]#0;	0.042	3425.56	3425.52	0.03911	11.42	TRUE
	3	TVMENFVAFVDKCCAADDKEACFAVEGPK	3,Oxidation[M]#0;12,HTL_AC_azide#0;22,Carbamidomethyl[C]#0;	0.0614	3425.53	3425.52	0.00676	1.97	TRUE
	3	TVMENFVAFVDKCCAADDKEACFAVEGPK	3,Oxidation[M]#0;12,HTL_AC_azide#0;22,Carbamidomethyl[C]#0;	0.284	3425.58	3425.52	0.05665	16.54	TRUE
	4	RHPYFYAPELLYYANKYNGVFQECCQAEDK	30,HTL_AC_azide#0;	3.09e-06	3874.8	3874.77	0.03447	8.9	TRUE
	4	RHPYFYAPELLYYANKYNGVFQECCQAEDK	30,HTL_AC_azide#0;	4.1e-06	3874.8	3874.77	0.03444	8.89	TRUE
	5	RHPYFYAPELLYYANKYNGVFQECCQAEDK	30,HTL_AC_azide#0;	0.000463	3874.81	3874.77	0.04279	11.04	TRUE
	3	RHPYFYAPELLYYANKYNGVFQECCQAEDK	30,HTL_AC_azide#0;	0.00142	3874.82	3874.77	0.0477	12.31	TRUE
	2	LKECCDKPLLEK	4,Carbamidomethyl[C]#0;5,Carbamidomethyl[C]#0;7,HTL_AC_azide#0;	1.68e-05	1747.88	1747.88	-0.00098	-0.56	TRUE
	2	LKECCDKPLLEK	4,Carbamidomethyl[C]#0;5,Carbamidomethyl[C]#0;7,HTL_AC_azide#0;	4.15e-05	1747.88	1747.88	0.0031	1.77	TRUE
	2	LKECCDKPLLEK	4,Carbamidomethyl[C]#0;5,Carbamidomethyl[C]#0;7,HTL_AC_azide#0;	5.61e-05	1747.88	1747.88	0.00271	1.55	TRUE
	2	LKECCDKPLLEK	4,Carbamidomethyl[C]#0;5,Carbamidomethyl[C]#0;7,HTL_AC_azide#0;	0.000547	1747.88	1747.88	0.00331	1.89	TRUE
	3	LKECCDKPLLEK	4,Carbamidomethyl[C]#0;5,Carbamidomethyl[C]#0;7,HTL_AC_azide#0;	0.00511	1747.88	1747.88	0.00295	1.69	TRUE
	4	LKECCDKPLLEK	4,Carbamidomethyl[C]#0;5,Carbamidomethyl[C]#0;7,HTL_AC_azide#0;	0.0221	1747.88	1747.88	-0.00059	-0.34	TRUE
	2	LKECCDKPLLEK	4,Carbamidomethyl[C]#0;5,Carbamidomethyl[C]#0;7,HTL_AC_azide#0;	0.0373	1747.88	1747.88	0.00149	0.85	TRUE
	3	LKECCDKPLLEK	4,Carbamidomethyl[C]#0;5,Carbamidomethyl[C]#0;7,HTL_AC_azide#0;	0.113	1747.88	1747.88	0.00026	0.15	TRUE
	2	LKECCDKPLLEK	4,Carbamidomethyl[C]#0;5,Carbamidomethyl[C]#0;7,HTL_AC_azide#0;	0.134	1747.88	1747.88	0.00459	2.63	TRUE
	3	LKECCDKPLLEK	4,Carbamidomethyl[C]#0;5,Carbamidomethyl[C]#0;7,HTL_AC_azide#0;	0.138	1747.88	1747.88	-0.00229	-1.31	TRUE
	2	LKECCDKPLLEK	4,Carbamidomethyl[C]#0;5,Carbamidomethyl[C]#0;7,HTL_AC_azide#0;	0.172	1747.88	1747.88	0.00554	3.17	TRUE
	3	LKECCDKPLLEK	4,Carbamidomethyl[C]#0;5,Carbamidomethyl[C]#0;7,HTL_AC_azide#0;	0.184	1747.88	1747.88	0.0028	1.6	TRUE
	3	LKECCDKPLLEK	4,Carbamidomethyl[C]#0;5,Carbamidomethyl[C]#0;7,HTL_AC_azide#0;	0.28	1747.88	1747.88	0.00315	1.8	TRUE
	2	LKECCDKPLLEK	4,Carbamidomethyl[C]#0;5,Carbamidomethyl[C]#0;7,HTL_AC_azide#0;	0.367	1747.88	1747.88	0.00344	1.97	TRUE
	2	FWGKYLYEIAR	4,HTL_AC_azide#0;	0.000141	1660.86	1660.86	0.00353	2.12	TRUE
	4	DTHKSEIAHR	4,HTL_AC_azide#0;	0.000252	1408.7	1408.7	0.0026	1.84	TRUE
	2	FWGKYLYEIAR	4,HTL_AC_azide#0;	0.000299	1660.86	1660.86	0.00342	2.06	TRUE
	2	DTHKSEIAHR	4,HTL_AC_azide#0;	0.000463	1408.7	1408.7	-2e-05	-0.01	TRUE
	2	DTHKSEIAHR	4,HTL_AC_azide#0;	0.000552	1408.7	1408.7	-0.00141	-1	TRUE
	2	DTHKSEIAHR	4,HTL_AC_azide#0;	0.000629	1408.7	1408.7	0.00264	1.87	TRUE
	3	DTHKSEIAHR	4,HTL_AC_azide#0;	0.000815	1408.7	1408.7	0.00158	1.12	TRUE
	2	DTHKSEIAHR	4,HTL_AC_azide#0;	0.00113	1408.7	1408.7	0.0006	0.42	TRUE
	2	DTHKSEIAHR	4,HTL_AC_azide#0;	0.00122	1408.7	1408.7	-0.00095	-0.67	TRUE
	2	DTHKSEIAHR	4,HTL_AC_azide#0;	0.00177	1408.7	1408.7	0.00139	0.99	TRUE
	2	DTHKSEIAHR	4,HTL_AC_azide#0;	0.002	1408.7	1408.7	0.00156	1.1	TRUE
	2	DTHKSEIAHR	4,HTL_AC_azide#0;	0.00231	1408.7	1408.7	0.00235	1.67	TRUE
	2	DTHKSEIAHR	4,HTL_AC_azide#0;	0.00256	1408.7	1408.7	0.0015	1.06	TRUE
	2	DTHKSEIAHR	4,HTL_AC_azide#0;	0.0026	1408.7	1408.7	0.00337	2.39	TRUE
	2	DTHKSEIAHR	4,HTL_AC_azide#0;	0.00261	1408.7	1408.7	0.00294	2.09	TRUE
	4	DTHKSEIAHR	4,HTL_AC_azide#0;	0.00271	1408.7	1408.7	0.00309	2.19	TRUE
	4	LSQKFPKAEFVEVTK	4,HTL_AC_azide#0;	0.00272	1966.08	1966.07	0.00601	3.05	TRUE
	3	FWGKYLYEIAR	4,HTL_AC_azide#0;	0.00273	1660.86	1660.86	0.00449	2.71	TRUE
	2	DTHKSEIAHR	4,HTL_AC_azide#0;	0.00291	1408.7	1408.7	0.00126	0.9	TRUE
	2	DTHKSEIAHR	4,HTL_AC_azide#0;	0.00302	1408.7	1408.7	0.00369	2.62	TRUE
	3	FWGKYLYEIAR	4,HTL_AC_azide#0;	0.00303	1660.86	1660.86	0.00452	2.72	TRUE
	3	DTHKSEIAHR	4,HTL_AC_azide#0;	0.00349	1408.7	1408.7	0.00078	0.56	TRUE
	4	DTHKSEIAHR	4,HTL_AC_azide#0;	0.00382	1408.7	1408.7	0.00306	2.17	TRUE
	4	DTHKSEIAHR	4,HTL_AC_azide#0;	0.0041	1408.7	1408.7	0.00272	1.93	TRUE
	2	DTHKSEIAHR	4,HTL_AC_azide#0;	0.00413	1408.7	1408.7	0.00074	0.53	TRUE
	3	DTHKSEIAHR	4,HTL_AC_azide#0;	0.00416	1408.7	1408.7	0.00157	1.12	TRUE
	3	FWGKYLYEIAR	4,HTL_AC_azide#0;	0.00427	1660.86	1660.86	0.00398	2.4	TRUE
	3	FWGKYLYEIAR	4,HTL_AC_azide#0;	0.00548	1660.86	1660.86	0.00452	2.72	TRUE
	4	DTHKSEIAHR	4,HTL_AC_azide#0;	0.00599	1408.7	1408.7	0.00339	2.41	TRUE
	4	DTHKSEIAHR	4,HTL_AC_azide#0;	0.00609	1408.7	1408.7	0.00298	2.12	TRUE
	3	FWGKYLYEIAR	4,HTL_AC_azide#0;	0.00612	1660.86	1660.86	0.00344	2.07	TRUE
	4	HKPKATEEQLK	4,HTL_AC_azide#0;	0.00711	1523.83	1523.82	0.00434	2.85	TRUE
	4	DTHKSEIAHR	4,HTL_AC_azide#0;	0.00729	1408.7	1408.7	0.0014	0.99	TRUE
	4	DTHKSEIAHR	4,HTL_AC_azide#0;	0.00735	1408.7	1408.7	0.00339	2.4	TRUE
	4	HKPKATEEQLK	4,HTL_AC_azide#0;	0.00815	1523.83	1523.82	0.0041	2.69	TRUE
	4	HKPKATEEQLK	4,HTL_AC_azide#0;	0.00854	1523.83	1523.82	0.00414	2.72	TRUE
	4	DTHKSEIAHR	4,HTL_AC_azide#0;	0.00866	1408.7	1408.7	0.00232	1.64	TRUE
	2	FWGKYLYEIAR	4,HTL_AC_azide#0;	0.0088	1660.86	1660.86	0.00307	1.85	TRUE
	2	QIKKQTALVELLK	4,HTL_AC_azide#0;	0.00891	1727.05	1727.05	0.00051	0.29	TRUE
	3	DTHKSEIAHR	4,HTL_AC_azide#0;	0.00898	1408.7	1408.7	0.00247	1.75	TRUE
	4	HKPKATEEQLK	4,HTL_AC_azide#0;	0.00905	1523.83	1523.82	0.00162	1.06	TRUE
	4	DTHKSEIAHR	4,HTL_AC_azide#0;	0.00983	1408.7	1408.7	0.00339	2.41	TRUE
	4	DTHKSEIAHR	4,HTL_AC_azide#0;	0.0101	1408.7	1408.7	0.00303	2.15	TRUE
	3	FWGKYLYEIAR	4,HTL_AC_azide#0;	0.0105	1660.86	1660.86	0.00586	3.53	TRUE
	4	DTHKSEIAHR	4,HTL_AC_azide#0;	0.0106	1408.7	1408.7	0.00027	0.19	TRUE
	3	DTHKSEIAHR	4,HTL_AC_azide#0;	0.0112	1408.7	1408.7	0.00201	1.43	TRUE
	4	DTHKSEIAHR	4,HTL_AC_azide#0;	0.0118	1408.7	1408.7	0.0023	1.63	TRUE
	4	QIKKQTALVELLK	4,HTL_AC_azide#0;	0.0121	1727.05	1727.05	0.00121	0.7	TRUE
	4	DTHKSEIAHR	4,HTL_AC_azide#0;	0.0123	1408.7	1408.7	-0.00067	-0.48	TRUE
	4	DTHKSEIAHR	4,HTL_AC_azide#0;	0.0125	1408.7	1408.7	0.00123	0.88	TRUE
	2	DTHKSEIAHR	4,HTL_AC_azide#0;	0.0127	1408.7	1408.7	0.00276	1.96	TRUE
	4	DTHKSEIAHR	4,HTL_AC_azide#0;	0.013	1408.7	1408.7	0.00078	0.56	TRUE
	2	HKPKATEEQLK	4,HTL_AC_azide#0;	0.0132	1523.83	1523.82	0.00188	1.23	TRUE
	4	DTHKSEIAHR	4,HTL_AC_azide#0;	0.0136	1408.7	1408.7	0.00395	2.8	TRUE
	3	DTHKSEIAHR	4,HTL_AC_azide#0;	0.0141	1408.7	1408.7	0.00334	2.37	TRUE
	4	DTHKSEIAHR	4,HTL_AC_azide#0;	0.0144	1408.7	1408.7	0.00081	0.57	TRUE
	4	DTHKSEIAHR	4,HTL_AC_azide#0;	0.0144	1408.7	1408.7	0.00036	0.25	TRUE
	4	DTHKSEIAHR	4,HTL_AC_azide#0;	0.0145	1408.7	1408.7	0.00067	0.48	TRUE
	3	DTHKSEIAHR	4,HTL_AC_azide#0;	0.0151	1408.7	1408.7	0.00359	2.55	TRUE
	4	DTHKSEIAHR	4,HTL_AC_azide#0;	0.0151	1408.7	1408.7	0.00076	0.54	TRUE
	3	DTHKSEIAHR	4,HTL_AC_azide#0;	0.0155	1408.7	1408.7	0.00375	2.66	TRUE
	3	DTHKSEIAHR	4,HTL_AC_azide#0;	0.0159	1408.7	1408.7	0.0036	2.56	TRUE
	3	FWGKYLYEIAR	4,HTL_AC_azide#0;	0.0159	1660.86	1660.86	0.00578	3.48	TRUE
	4	LSQKFPKAEFVEVTK	4,HTL_AC_azide#0;	0.0162	1966.08	1966.07	0.004	2.04	TRUE
	4	DTHKSEIAHR	4,HTL_AC_azide#0;	0.0169	1408.7	1408.7	0.00325	2.3	TRUE
	4	DTHKSEIAHR	4,HTL_AC_azide#0;	0.0171	1408.7	1408.7	0.00363	2.58	TRUE
	4	DTHKSEIAHR	4,HTL_AC_azide#0;	0.0177	1408.7	1408.7	0.00306	2.17	TRUE
	3	DTHKSEIAHR	4,HTL_AC_azide#0;	0.0179	1408.7	1408.7	0.00113	0.8	TRUE
	3	DTHKSEIAHR	4,HTL_AC_azide#0;	0.0182	1408.7	1408.7	0.0042	2.98	TRUE
	3	DTHKSEIAHR	4,HTL_AC_azide#0;	0.0186	1408.7	1408.7	0.00327	2.32	TRUE
	3	DTHKSEIAHR	4,HTL_AC_azide#0;	0.0189	1408.7	1408.7	0.0027	1.92	TRUE
	4	DTHKSEIAHR	4,HTL_AC_azide#0;	0.0191	1408.7	1408.7	0.00165	1.17	TRUE
	3	DTHKSEIAHR	4,HTL_AC_azide#0;	0.0203	1408.7	1408.7	0.00182	1.29	TRUE
	3	DTHKSEIAHR	4,HTL_AC_azide#0;	0.0203	1408.7	1408.7	0.00209	1.48	TRUE
	4	HKPKATEEQLK	4,HTL_AC_azide#0;	0.0204	1523.83	1523.82	0.00107	0.7	TRUE
	4	DTHKSEIAHR	4,HTL_AC_azide#0;	0.0208	1408.7	1408.7	0.00399	2.83	TRUE
	3	DTHKSEIAHR	4,HTL_AC_azide#0;	0.0212	1408.7	1408.7	0.00322	2.29	TRUE
	3	DTHKSEIAHR	4,HTL_AC_azide#0;	0.0219	1408.7	1408.7	0.00372	2.64	TRUE
	3	DTHKSEIAHR	4,HTL_AC_azide#0;	0.022	1408.7	1408.7	0.0014	0.99	TRUE
	3	DTHKSEIAHR	4,HTL_AC_azide#0;	0.022	1408.7	1408.7	0.00155	1.1	TRUE
	3	DTHKSEIAHR	4,HTL_AC_azide#0;	0.0224	1408.7	1408.7	-0.00136	-0.96	TRUE
	3	DTHKSEIAHR	4,HTL_AC_azide#0;	0.0229	1408.7	1408.7	0.00388	2.76	TRUE
	3	DTHKSEIAHR	4,HTL_AC_azide#0;	0.0238	1408.7	1408.7	0.00172	1.22	TRUE
	3	DTHKSEIAHR	4,HTL_AC_azide#0;	0.0242	1408.7	1408.7	0.00068	0.48	TRUE
	3	DTHKSEIAHR	4,HTL_AC_azide#0;	0.0259	1408.7	1408.7	0.00268	1.91	TRUE
	4	DTHKSEIAHR	4,HTL_AC_azide#0;	0.0263	1408.7	1408.7	0.00065	0.46	TRUE
	4	DTHKSEIAHR	4,HTL_AC_azide#0;	0.0267	1408.7	1408.7	0.00154	1.09	TRUE
	3	DTHKSEIAHR	4,HTL_AC_azide#0;	0.0267	1408.7	1408.7	0.00311	2.21	TRUE
	3	DTHKSEIAHR	4,HTL_AC_azide#0;	0.0267	1408.7	1408.7	0.00097	0.69	TRUE
	2	SLGKVGTR	4,HTL_AC_azide#0;	0.0277	1032.59	1032.59	0.00245	2.38	TRUE
	3	DTHKSEIAHR	4,HTL_AC_azide#0;	0.0281	1408.7	1408.7	0.00363	2.57	TRUE
	3	QIKKQTALVELLK	4,HTL_AC_azide#0;	0.029	1727.05	1727.05	0.00304	1.76	TRUE
	3	DTHKSEIAHR	4,HTL_AC_azide#0;	0.029	1408.7	1408.7	0.00137	0.97	TRUE
	2	HKPKATEEQLK	4,HTL_AC_azide#0;	0.0298	1523.83	1523.82	0.00297	1.95	TRUE
	4	DTHKSEIAHR	4,HTL_AC_azide#0;	0.031	1408.7	1408.7	0.0032	2.27	TRUE
	3	DTHKSEIAHR	4,HTL_AC_azide#0;	0.0327	1408.7	1408.7	0.00476	3.38	TRUE
	3	DTHKSEIAHR	4,HTL_AC_azide#0;	0.0329	1408.7	1408.7	0.00467	3.31	TRUE
	3	DTHKSEIAHR	4,HTL_AC_azide#0;	0.0332	1408.7	1408.7	0.00247	1.75	TRUE
	2	SLGKVGTR	4,HTL_AC_azide#0;	0.0338	1032.59	1032.59	0.00164	1.59	TRUE
	4	DTHKSEIAHR	4,HTL_AC_azide#0;	0.0355	1408.7	1408.7	0.00219	1.56	TRUE
	3	DTHKSEIAHR	4,HTL_AC_azide#0;	0.0377	1408.7	1408.7	0.00297	2.11	TRUE
	3	FWGKYLYEIAR	4,HTL_AC_azide#0;	0.0414	1660.87	1660.86	0.01201	7.23	TRUE
	3	DTHKSEIAHR	4,HTL_AC_azide#0;	0.0418	1408.7	1408.7	0.00315	2.24	TRUE
	2	DTHKSEIAHR	4,HTL_AC_azide#0;	0.042	1408.7	1408.7	-0.00032	-0.23	TRUE
	3	DTHKSEIAHR	4,HTL_AC_azide#0;	0.0436	1408.7	1408.7	0.00212	1.5	TRUE
	3	DTHKSEIAHR	4,HTL_AC_azide#0;	0.0458	1408.7	1408.7	0.00402	2.85	TRUE
	3	DTHKSEIAHR	4,HTL_AC_azide#0;	0.0475	1408.7	1408.7	0.00433	3.07	TRUE
	2	SLGKVGTR	4,HTL_AC_azide#0;	0.0476	1032.59	1032.59	0.00303	2.93	TRUE
	2	SLGKVGTR	4,HTL_AC_azide#0;	0.0497	1032.59	1032.59	0.00277	2.68	TRUE
	2	SLGKVGTR	4,HTL_AC_azide#0;	0.0497	1032.59	1032.59	0.00186	1.8	TRUE
	4	DTHKSEIAHR	4,HTL_AC_azide#0;	0.0498	1408.7	1408.7	0.00192	1.36	TRUE
	2	SLGKVGTR	4,HTL_AC_azide#0;	0.0522	1032.59	1032.59	0.00182	1.77	TRUE
	2	SLGKVGTR	4,HTL_AC_azide#0;	0.0531	1032.59	1032.59	0.0031	3	TRUE
	2	SLGKVGTR	4,HTL_AC_azide#0;	0.0628	1032.59	1032.59	0.00248	2.4	TRUE
	2	DTHKSEIAHR	4,HTL_AC_azide#0;	0.0682	1408.7	1408.7	-0.00022	-0.16	TRUE
	3	DTHKSEIAHR	4,HTL_AC_azide#0;	0.0683	1408.7	1408.7	0.00314	2.23	TRUE
	2	DTHKSEIAHR	4,HTL_AC_azide#0;	0.0702	1408.7	1408.7	-4e-05	-0.03	TRUE
	2	SLGKVGTR	4,HTL_AC_azide#0;	0.0737	1032.59	1032.59	0.00209	2.02	TRUE
	2	SLGKVGTR	4,HTL_AC_azide#0;	0.0751	1032.59	1032.59	0.0017	1.65	TRUE
	2	SLGKVGTR	4,HTL_AC_azide#0;	0.0875	1032.59	1032.59	0.002	1.94	TRUE
	2	SLGKVGTR	4,HTL_AC_azide#0;	0.0894	1032.59	1032.59	0.0025	2.42	TRUE
	3	ADEKKFWGK	4,HTL_AC_azide#0;	0.0961	1323.68	1323.68	0.00223	1.68	TRUE
	3	DTHKSEIAHR	4,HTL_AC_azide#0;	0.0986	1408.7	1408.7	0.00441	3.13	TRUE
	4	HKPKATEEQLK	4,HTL_AC_azide#0;	0.113	1523.83	1523.82	0.00361	2.37	TRUE
	3	DTHKSEIAHR	4,HTL_AC_azide#0;	0.119	1408.7	1408.7	0.00356	2.53	TRUE
	3	DTHKSEIAHR	4,HTL_AC_azide#0;	0.124	1408.7	1408.7	0.0042	2.98	TRUE
	2	FWGKYLYEIAR	4,HTL_AC_azide#0;	0.125	1660.86	1660.86	0.00497	2.99	TRUE
	3	DTHKSEIAHR	4,HTL_AC_azide#0;	0.132	1408.71	1408.7	0.00493	3.5	TRUE
	3	DTHKSEIAHR	4,HTL_AC_azide#0;	0.135	1408.7	1408.7	0.00483	3.43	TRUE
	3	DTHKSEIAHR	4,HTL_AC_azide#0;	0.138	1408.7	1408.7	0.00271	1.92	TRUE
	3	DTHKSEIAHR	4,HTL_AC_azide#0;	0.146	1408.7	1408.7	0.00453	3.21	TRUE
	3	DTHKSEIAHR	4,HTL_AC_azide#0;	0.151	1408.7	1408.7	0.00429	3.04	TRUE
	3	LSQKFPK	4,HTL_AC_azide#0;	0.153	1062.6	1062.6	0.00202	1.9	TRUE
	3	DTHKSEIAHR	4,HTL_AC_azide#0;	0.156	1408.7	1408.7	0.00234	1.66	TRUE
	3	LSQKFPK	4,HTL_AC_azide#0;	0.166	1062.6	1062.6	0.00172	1.62	TRUE
	2	SLGKVGTR	4,HTL_AC_azide#0;	0.172	1032.59	1032.59	0.00266	2.57	TRUE
	3	DTHKSEIAHR	4,HTL_AC_azide#0;	0.173	1408.7	1408.7	0.00443	3.15	TRUE
	3	DTHKSEIAHR	4,HTL_AC_azide#0;	0.188	1408.7	1408.7	0.00138	0.98	TRUE
	3	LSQKFPK	4,HTL_AC_azide#0;	0.191	1062.6	1062.6	0.00145	1.37	TRUE
	3	LSQKFPK	4,HTL_AC_azide#0;	0.192	1062.6	1062.6	0.0014	1.31	TRUE
	3	HKPKATEEQLK	4,HTL_AC_azide#0;	0.193	1523.83	1523.82	0.00417	2.73	TRUE
	2	SLGKVGTR	4,HTL_AC_azide#0;	0.193	1032.59	1032.59	0.0027	2.61	TRUE
	2	SLGKVGTR	4,HTL_AC_azide#0;	0.203	1032.59	1032.59	0.0027	2.61	TRUE
	3	DTHKSEIAHR	4,HTL_AC_azide#0;	0.203	1408.7	1408.7	0.00138	0.98	TRUE
	2	SLGKVGTR	4,HTL_AC_azide#0;	0.227	1032.59	1032.59	0.00233	2.26	TRUE
	3	LSQKFPK	4,HTL_AC_azide#0;	0.228	1062.6	1062.6	0.0017	1.6	TRUE
	2	SLGKVGTR	4,HTL_AC_azide#0;	0.229	1032.59	1032.59	0.00193	1.87	TRUE
	3	HKPKATEEQLK	4,HTL_AC_azide#0;	0.238	1523.83	1523.82	0.00647	4.24	TRUE
	3	LSQKFPK	4,HTL_AC_azide#0;	0.241	1062.6	1062.6	0.00177	1.67	TRUE
	3	DTHKSEIAHR	4,HTL_AC_azide#0;	0.243	1408.7	1408.7	0.0037	2.63	TRUE
	2	SLGKVGTR	4,HTL_AC_azide#0;	0.254	1032.59	1032.59	0.00308	2.98	TRUE
	2	SLGKVGTR	4,HTL_AC_azide#0;	0.263	1032.59	1032.59	0.00223	2.16	TRUE
	3	ADEKKFWGK	4,HTL_AC_azide#0;	0.266	1323.68	1323.68	0.00345	2.61	TRUE
	3	LSQKFPK	4,HTL_AC_azide#0;	0.268	1062.6	1062.6	0.00149	1.4	TRUE
	3	LSQKFPK	4,HTL_AC_azide#0;	0.277	1062.6	1062.6	0.00026	0.25	TRUE
	2	SLGKVGTR	4,HTL_AC_azide#0;	0.284	1032.59	1032.59	0.00127	1.23	TRUE
	2	LSQKFPK	4,HTL_AC_azide#0;	0.285	1062.6	1062.6	0.00194	1.82	TRUE
	2	SLGKVGTR	4,HTL_AC_azide#0;	0.29	1032.59	1032.59	0.0026	2.52	TRUE
	3	HKPKATEEQLK	4,HTL_AC_azide#0;	0.304	1523.83	1523.82	0.00263	1.73	TRUE
	2	SLGKVGTR	4,HTL_AC_azide#0;	0.324	1032.59	1032.59	0.00204	1.98	TRUE
	3	LSQKFPK	4,HTL_AC_azide#0;	0.324	1062.6	1062.6	0.00103	0.97	TRUE
	3	HKPKATEEQLK	4,HTL_AC_azide#0;	0.325	1523.83	1523.82	0.00252	1.65	TRUE
	3	DTHKSEIAHR	4,HTL_AC_azide#0;	0.325	1408.71	1408.7	0.00502	3.57	TRUE
	4	LSQKFPKAEFVEVTK	4,HTL_AC_azide#0;	0.325	1966.07	1966.07	0.00047	0.24	TRUE
	2	SLGKVGTR	4,HTL_AC_azide#0;	0.33	1032.59	1032.59	0.00271	2.63	TRUE
	3	DTHKSEIAHR	4,HTL_AC_azide#0;	0.334	1408.7	1408.7	0.00328	2.33	TRUE
	3	HKPKATEEQLK	4,HTL_AC_azide#0;	0.348	1523.83	1523.82	0.00422	2.77	TRUE
	2	SLGKVGTR	4,HTL_AC_azide#0;	0.372	1032.59	1032.59	0.0028	2.71	TRUE
	2	DTHKSEIAHR	4,HTL_AC_azide#0;	0.377	1408.7	1408.7	0.00295	2.09	TRUE
	2	HKPKATEEQLK	4,HTL_AC_azide#0;	0.38	1523.83	1523.82	0.00035	0.23	TRUE
	3	HKPKATEEQLK	4,HTL_AC_azide#0;	0.381	1523.83	1523.82	0.00467	3.06	TRUE
	2	LSQKFPK	4,HTL_AC_azide#0;	0.382	1062.6	1062.6	0.00261	2.46	TRUE
	2	HKPKATEEQLK	4,HTL_AC_azide#0;	0.407	1523.83	1523.82	0.00039	0.25	TRUE
	4	HKPKATEEQLK	4,HTL_AC_azide#0;	0.41	1523.83	1523.82	0.00443	2.91	TRUE
	2	LSQKFPK	4,HTL_AC_azide#0;	0.417	1062.6	1062.6	0.00262	2.47	TRUE
	4	CCTKPESERMPCTEDYLSLILNR	4,HTL_AC_azide#0;10,Oxidation[M]#0;12,Carbamidomethyl[C]#0;	0.0516	2989.35	2989.36	-0.01223	-4.09	TRUE
	2	KFWGKYLYEIAR	5,HTL_AC_azide#0;	6.54e-06	1788.95	1788.95	0.00309	1.73	TRUE
	2	KFWGKYLYEIAR	5,HTL_AC_azide#0;	9.58e-06	1788.95	1788.95	0.00396	2.21	TRUE
	2	KFWGKYLYEIAR	5,HTL_AC_azide#0;	1.99e-05	1788.95	1788.95	0.00207	1.16	TRUE
	2	KFWGKYLYEIAR	5,HTL_AC_azide#0;	3.15e-05	1788.95	1788.95	0.00282	1.58	TRUE
	3	KFWGKYLYEIAR	5,HTL_AC_azide#0;	0.00148	1788.95	1788.95	0.00436	2.44	TRUE
	3	KFWGKYLYEIAR	5,HTL_AC_azide#0;	0.00196	1788.95	1788.95	0.00246	1.37	TRUE
	3	KFWGKYLYEIAR	5,HTL_AC_azide#0;	0.00203	1788.95	1788.95	0.00396	2.21	TRUE
	3	KFWGKYLYEIAR	5,HTL_AC_azide#0;	0.00206	1788.95	1788.95	0.00374	2.09	TRUE
	3	KFWGKYLYEIAR	5,HTL_AC_azide#0;	0.00353	1788.95	1788.95	0.00063	0.35	TRUE
	3	KFWGKYLYEIAR	5,HTL_AC_azide#0;	0.00381	1788.95	1788.95	0.00295	1.65	TRUE
	3	KFWGKYLYEIAR	5,HTL_AC_azide#0;	0.00412	1788.95	1788.95	0.00381	2.13	TRUE
	3	KFWGKYLYEIAR	5,HTL_AC_azide#0;	0.00452	1788.95	1788.95	0.00353	1.97	TRUE
	3	KFWGKYLYEIAR	5,HTL_AC_azide#0;	0.00476	1788.95	1788.95	0.00374	2.09	TRUE
	3	KFWGKYLYEIAR	5,HTL_AC_azide#0;	0.00485	1788.95	1788.95	0.00241	1.34	TRUE
	3	KFWGKYLYEIAR	5,HTL_AC_azide#0;	0.00528	1788.95	1788.95	0.00423	2.36	TRUE
	3	KFWGKYLYEIAR	5,HTL_AC_azide#0;	0.00572	1788.95	1788.95	0.00359	2.01	TRUE
	2	KFWGKYLYEIAR	5,HTL_AC_azide#0;	0.00651	1788.95	1788.95	0.00252	1.41	TRUE
	2	KFWGKYLYEIAR	5,HTL_AC_azide#0;	0.00677	1788.95	1788.95	0.00016	0.09	TRUE
	3	KFWGKYLYEIAR	5,HTL_AC_azide#0;	0.00755	1788.95	1788.95	0.00356	1.99	TRUE
	3	KFWGKYLYEIAR	5,HTL_AC_azide#0;	0.00881	1788.95	1788.95	0.00034	0.19	TRUE
	3	KFWGKYLYEIAR	5,HTL_AC_azide#0;	0.0109	1788.95	1788.95	0.00162	0.9	TRUE
	3	KFWGKYLYEIAR	5,HTL_AC_azide#0;	0.0145	1788.95	1788.95	0.00212	1.18	TRUE
	3	KFWGKYLYEIAR	5,HTL_AC_azide#0;	0.026	1788.95	1788.95	0.00382	2.14	TRUE
	4	RDTHKSEIAHR	5,HTL_AC_azide#0;	0.0808	1564.82	1564.8	0.01702	10.88	TRUE
	4	KFWGKYLYEIAR	5,HTL_AC_azide#0;	0.0825	1788.96	1788.95	0.00494	2.76	TRUE
	4	KFWGKYLYEIAR	5,HTL_AC_azide#0;	0.0875	1788.96	1788.95	0.00554	3.09	TRUE
	4	RDTHKSEIAHR	5,HTL_AC_azide#0;	0.0929	1564.82	1564.8	0.01582	10.11	TRUE
	4	RDTHKSEIAHR	5,HTL_AC_azide#0;	0.111	1564.82	1564.8	0.01752	11.2	TRUE
	4	KFWGKYLYEIAR	5,HTL_AC_azide#0;	0.129	1788.95	1788.95	0.00304	1.7	TRUE
	4	RDTHKSEIAHR	5,HTL_AC_azide#0;	0.163	1564.82	1564.8	0.01671	10.68	TRUE
	4	KFWGKYLYEIAR	5,HTL_AC_azide#0;	0.167	1788.95	1788.95	0.00384	2.14	TRUE
	2	KFWGKYLYEIAR	5,HTL_AC_azide#0;	0.234	1788.95	1788.95	0.00305	1.7	TRUE
	4	KFWGKYLYEIAR	5,HTL_AC_azide#0;	0.254	1788.96	1788.95	0.00498	2.78	TRUE
	4	RDTHKSEIAHR	5,HTL_AC_azide#0;	0.256	1564.82	1564.8	0.01632	10.43	TRUE
	4	KFWGKYLYEIAR	5,HTL_AC_azide#0;	0.306	1788.96	1788.95	0.00463	2.59	TRUE
	4	KFWGKYLYEIAR	5,HTL_AC_azide#0;	0.309	1788.96	1788.95	0.00686	3.83	TRUE
	4	RDTHKSEIAHR	5,HTL_AC_azide#0;	0.341	1564.82	1564.8	0.01646	10.52	TRUE
	4	RDTHKSEIAHR	5,HTL_AC_azide#0;	0.349	1564.82	1564.8	0.01814	11.59	TRUE
	4	RDTHKSEIAHR	5,HTL_AC_azide#0;	0.355	1564.82	1564.8	0.01831	11.7	TRUE
	4	RDTHKSEIAHR	5,HTL_AC_azide#0;	0.359	1564.82	1564.8	0.01774	11.34	TRUE
	2	AFDEKLFTFHADICTLPDTEK	5,HTL_AC_azide#0;14,Carbamidomethyl[C]#0;	7.8e-09	2713.3	2713.29	0.00842	3.1	TRUE
	2	AFDEKLFTFHADICTLPDTEK	5,HTL_AC_azide#0;14,Carbamidomethyl[C]#0;	3.7e-08	2713.3	2713.29	0.00828	3.05	TRUE
	3	AFDEKLFTFHADICTLPDTEK	5,HTL_AC_azide#0;14,Carbamidomethyl[C]#0;	3.58e-07	2713.29	2713.29	0.00045	0.17	TRUE
	3	AFDEKLFTFHADICTLPDTEK	5,HTL_AC_azide#0;14,Carbamidomethyl[C]#0;	1.93e-06	2713.3	2713.29	0.00638	2.35	TRUE
	3	AFDEKLFTFHADICTLPDTEK	5,HTL_AC_azide#0;14,Carbamidomethyl[C]#0;	7.38e-06	2713.29	2713.29	0.00504	1.86	TRUE
	4	AFDEKLFTFHADICTLPDTEK	5,HTL_AC_azide#0;14,Carbamidomethyl[C]#0;	1.72e-05	2713.3	2713.29	0.0081	2.99	TRUE
	3	AFDEKLFTFHADICTLPDTEK	5,HTL_AC_azide#0;14,Carbamidomethyl[C]#0;	3.44e-05	2713.3	2713.29	0.00637	2.35	TRUE
	3	AFDEKLFTFHADICTLPDTEK	5,HTL_AC_azide#0;14,Carbamidomethyl[C]#0;	3.87e-05	2713.29	2713.29	0.00367	1.35	TRUE
	3	AFDEKLFTFHADICTLPDTEK	5,HTL_AC_azide#0;14,Carbamidomethyl[C]#0;	4.01e-05	2713.29	2713.29	0.00439	1.62	TRUE
	3	AFDEKLFTFHADICTLPDTEK	5,HTL_AC_azide#0;14,Carbamidomethyl[C]#0;	0.000103	2713.3	2713.29	0.00855	3.15	TRUE
	4	AFDEKLFTFHADICTLPDTEK	5,HTL_AC_azide#0;14,Carbamidomethyl[C]#0;	0.000164	2713.29	2713.29	0.00444	1.64	TRUE
	2	AFDEKLFTFHADICTLPDTEK	5,HTL_AC_azide#0;14,Carbamidomethyl[C]#0;	0.00145	2713.29	2713.29	-0.00128	-0.47	TRUE
	2	AFDEKLFTFHADICTLPDTEK	5,HTL_AC_azide#0;14,Carbamidomethyl[C]#0;	0.00248	2713.29	2713.29	-0.00122	-0.45	TRUE
	4	AFDEKLFTFHADICTLPDTEK	5,HTL_AC_azide#0;14,Carbamidomethyl[C]#0;	0.00468	2713.29	2713.29	0.00428	1.58	TRUE
	3	AFDEKLFTFHADICTLPDTEK	5,HTL_AC_azide#0;14,Carbamidomethyl[C]#0;	0.00695	2713.29	2713.29	0.00277	1.02	TRUE
	4	AFDEKLFTFHADICTLPDTEK	5,HTL_AC_azide#0;14,Carbamidomethyl[C]#0;	0.00922	2713.29	2713.29	-0.00319	-1.18	TRUE
	4	AFDEKLFTFHADICTLPDTEK	5,HTL_AC_azide#0;14,Carbamidomethyl[C]#0;	0.0115	2713.29	2713.29	0.0045	1.66	TRUE
	4	AFDEKLFTFHADICTLPDTEK	5,HTL_AC_azide#0;14,Carbamidomethyl[C]#0;	0.0181	2713.29	2713.29	0.00353	1.3	TRUE
	4	AFDEKLFTFHADICTLPDTEK	5,HTL_AC_azide#0;14,Carbamidomethyl[C]#0;	0.0202	2713.3	2713.29	0.00655	2.42	TRUE
	3	AFDEKLFTFHADICTLPDTEK	5,HTL_AC_azide#0;14,Carbamidomethyl[C]#0;	0.162	2713.29	2713.29	0.00416	1.53	TRUE
	2	DDPHACYSTVFDKLK	6,Carbamidomethyl[C]#0;13,HTL_AC_azide#0;	1.32e-06	2010.93	2010.93	0.00512	2.55	TRUE
	2	DDPHACYSTVFDKLK	6,Carbamidomethyl[C]#0;13,HTL_AC_azide#0;	2.75e-06	2010.94	2010.93	0.00517	2.57	TRUE
	5	DDPHACYSTVFDKLKHLVDEPQNLIK	6,Carbamidomethyl[C]#0;13,HTL_AC_azide#0;	3.25e-06	3297.64	3297.63	0.00768	2.33	TRUE
	2	DDPHACYSTVFDKLK	6,Carbamidomethyl[C]#0;13,HTL_AC_azide#0;	5.9e-06	2010.94	2010.93	0.00577	2.87	TRUE
	5	DDPHACYSTVFDKLKHLVDEPQNLIK	6,Carbamidomethyl[C]#0;13,HTL_AC_azide#0;	7.5e-06	3297.64	3297.63	0.0122	3.7	TRUE
	2	DDPHACYSTVFDKLK	6,Carbamidomethyl[C]#0;13,HTL_AC_azide#0;	7.62e-06	2010.94	2010.93	0.0055	2.74	TRUE
	2	DDPHACYSTVFDKLK	6,Carbamidomethyl[C]#0;13,HTL_AC_azide#0;	9.26e-06	2010.94	2010.93	0.01213	6.03	TRUE
	4	DDPHACYSTVFDKLKHLVDEPQNLIK	6,Carbamidomethyl[C]#0;13,HTL_AC_azide#0;	9.59e-06	3297.63	3297.63	0.00664	2.01	TRUE
	2	DDPHACYSTVFDKLK	6,Carbamidomethyl[C]#0;13,HTL_AC_azide#0;	1.46e-05	2010.94	2010.93	0.0085	4.23	TRUE
	3	DDPHACYSTVFDKLK	6,Carbamidomethyl[C]#0;13,HTL_AC_azide#0;	0.000183	2010.93	2010.93	0.00448	2.23	TRUE
	3	DDPHACYSTVFDKLK	6,Carbamidomethyl[C]#0;13,HTL_AC_azide#0;	0.000227	2010.93	2010.93	0.00443	2.2	TRUE
	3	DDPHACYSTVFDKLK	6,Carbamidomethyl[C]#0;13,HTL_AC_azide#0;	0.00052	2010.93	2010.93	0.00443	2.2	TRUE
	3	DDPHACYSTVFDKLK	6,Carbamidomethyl[C]#0;13,HTL_AC_azide#0;	0.000589	2010.94	2010.93	0.00561	2.79	TRUE
	5	DDPHACYSTVFDKLKHLVDEPQNLIK	6,Carbamidomethyl[C]#0;13,HTL_AC_azide#0;	0.000711	3297.66	3297.63	0.03072	9.31	TRUE
	2	DDPHACYSTVFDKLK	6,Carbamidomethyl[C]#0;13,HTL_AC_azide#0;	0.00264	2010.93	2010.93	0.00488	2.43	TRUE
	5	DDPHACYSTVFDKLKHLVDEPQNLIK	6,Carbamidomethyl[C]#0;13,HTL_AC_azide#0;	0.00491	3297.65	3297.63	0.02123	6.44	TRUE
	3	DDPHACYSTVFDKLK	6,Carbamidomethyl[C]#0;13,HTL_AC_azide#0;	0.0062	2010.93	2010.93	0.00451	2.24	TRUE
	4	DDPHACYSTVFDKLK	6,Carbamidomethyl[C]#0;13,HTL_AC_azide#0;	0.00704	2010.93	2010.93	0.00486	2.41	TRUE
	4	DDPHACYSTVFDKLK	6,Carbamidomethyl[C]#0;13,HTL_AC_azide#0;	0.017	2010.93	2010.93	0.00408	2.03	TRUE
	2	DDPHACYSTVFDKLK	6,Carbamidomethyl[C]#0;13,HTL_AC_azide#0;	0.0182	2010.96	2010.93	0.03345	16.64	TRUE
	4	DDPHACYSTVFDKLK	6,Carbamidomethyl[C]#0;13,HTL_AC_azide#0;	0.0268	2010.93	2010.93	0.00327	1.62	TRUE
	4	DDPHACYSTVFDKLK	6,Carbamidomethyl[C]#0;13,HTL_AC_azide#0;	0.0295	2010.93	2010.93	0.00344	1.71	TRUE
	3	DDPHACYSTVFDKLK	6,Carbamidomethyl[C]#0;13,HTL_AC_azide#0;	0.033	2010.93	2010.93	0.00031	0.15	TRUE
	3	DDPHACYSTVFDKLK	6,Carbamidomethyl[C]#0;13,HTL_AC_azide#0;	0.044	2010.93	2010.93	-0.00017	-0.09	TRUE
	4	DDPHACYSTVFDKLK	6,Carbamidomethyl[C]#0;13,HTL_AC_azide#0;	0.0702	2010.93	2010.93	0.00317	1.58	TRUE
	3	DDPHACYSTVFDKLK	6,Carbamidomethyl[C]#0;13,HTL_AC_azide#0;	0.0833	2010.94	2010.93	0.00633	3.15	TRUE
	3	DDPHACYSTVFDKLK	6,Carbamidomethyl[C]#0;13,HTL_AC_azide#0;	0.108	2010.93	2010.93	0.00388	1.93	TRUE
	4	DDPHACYSTVFDKLK	6,Carbamidomethyl[C]#0;13,HTL_AC_azide#0;	0.11	2010.94	2010.93	0.00548	2.72	TRUE
	3	DDPHACYSTVFDKLK	6,Carbamidomethyl[C]#0;13,HTL_AC_azide#0;	0.142	2010.93	2010.93	0.00016	0.08	TRUE
	4	DDPHACYSTVFDKLK	6,Carbamidomethyl[C]#0;13,HTL_AC_azide#0;	0.153	2010.93	2010.93	-3e-05	-0.02	TRUE
	2	DDPHACYSTVFDKLK	6,Carbamidomethyl[C]#0;13,HTL_AC_azide#0;	0.153	2010.93	2010.93	0.00306	1.52	TRUE
	3	DDPHACYSTVFDKLK	6,Carbamidomethyl[C]#0;13,HTL_AC_azide#0;	0.17	2010.93	2010.93	-0.00098	-0.49	TRUE
	3	DDPHACYSTVFDKLK	6,Carbamidomethyl[C]#0;13,HTL_AC_azide#0;	0.262	2010.94	2010.93	0.00632	3.14	TRUE
	4	DDPHACYSTVFDKLK	6,Carbamidomethyl[C]#0;13,HTL_AC_azide#0;	0.322	2010.93	2010.93	0.00392	1.95	TRUE
	3	DDPHACYSTVFDKLK	6,Carbamidomethyl[C]#0;13,HTL_AC_azide#0;	0.378	2010.94	2010.93	0.00542	2.69	TRUE
	4	DDPHACYSTVFDKLKHLVDEPQNLIK	6,Carbamidomethyl[C]#0;15,HTL_AC_azide#0;	7.53e-06	3297.64	3297.63	0.00747	2.27	TRUE
	3	DDPHACYSTVFDKLKHLVDEPQNLIK	6,Carbamidomethyl[C]#0;15,HTL_AC_azide#0;	2.57e-05	3297.64	3297.63	0.00857	2.6	TRUE
	4	DDPHACYSTVFDKLKHLVDEPQNLIK	6,Carbamidomethyl[C]#0;15,HTL_AC_azide#0;	2.74e-05	3297.64	3297.63	0.00738	2.24	TRUE
	4	DDPHACYSTVFDKLKHLVDEPQNLIK	6,Carbamidomethyl[C]#0;15,HTL_AC_azide#0;	2.8e-05	3297.63	3297.63	0.00637	1.93	TRUE
	3	DDPHACYSTVFDKLKHLVDEPQNLIK	6,Carbamidomethyl[C]#0;15,HTL_AC_azide#0;	9.81e-05	3297.63	3297.63	0.00576	1.75	TRUE
	3	DDPHACYSTVFDKLKHLVDEPQNLIK	6,Carbamidomethyl[C]#0;15,HTL_AC_azide#0;	0.00135	3297.64	3297.63	0.00865	2.62	TRUE
	4	DDPHACYSTVFDKLKHLVDEPQNLIK	6,Carbamidomethyl[C]#0;15,HTL_AC_azide#0;	0.00475	3297.63	3297.63	0.00571	1.73	TRUE
	4	DDPHACYSTVFDKLKHLVDEPQNLIK	6,Carbamidomethyl[C]#0;15,HTL_AC_azide#0;	0.0207	3297.63	3297.63	0.00176	0.53	TRUE
	4	DDPHACYSTVFDKLKHLVDEPQNLIK	6,Carbamidomethyl[C]#0;15,HTL_AC_azide#0;	0.0304	3297.63	3297.63	0.0042	1.27	TRUE
	4	DDPHACYSTVFDKLKHLVDEPQNLIK	6,Carbamidomethyl[C]#0;15,HTL_AC_azide#0;	0.15	3297.63	3297.63	0.00664	2.01	TRUE
	4	DDPHACYSTVFDKLKHLVDEPQNLIK	6,Carbamidomethyl[C]#0;15,HTL_AC_azide#0;	0.328	3297.63	3297.63	-0.00132	-0.4	TRUE
	2	NYQEAKDAFLGSFLYEYSR	6,HTL_AC_azide#0;	1.69e-07	2516.19	2516.18	0.00984	3.91	TRUE
	3	NYQEAKDAFLGSFLYEYSR	6,HTL_AC_azide#0;	9.11e-07	2516.19	2516.18	0.00633	2.51	TRUE
	3	NYQEAKDAFLGSFLYEYSR	6,HTL_AC_azide#0;	1.42e-06	2516.19	2516.18	0.005	1.99	TRUE
	3	NYQEAKDAFLGSFLYEYSR	6,HTL_AC_azide#0;	5.29e-06	2516.19	2516.18	0.00656	2.61	TRUE
	3	NYQEAKDAFLGSFLYEYSR	6,HTL_AC_azide#0;	0.000155	2516.19	2516.18	0.00661	2.63	TRUE
	2	NYQEAKDAFLGSFLYEYSR	6,HTL_AC_azide#0;	0.000541	2516.18	2516.18	-0.00203	-0.8	TRUE
	2	TPVSEKVTK	6,HTL_AC_azide#0;	0.0026	1203.67	1203.67	0.00351	2.92	TRUE
	2	TPVSEKVTK	6,HTL_AC_azide#0;	0.00625	1203.67	1203.67	0.00141	1.17	TRUE
	3	NYQEAKDAFLGSFLYEYSR	6,HTL_AC_azide#0;	0.0075	2516.18	2516.18	-0.00264	-1.05	TRUE
	2	TPVSEKVTK	6,HTL_AC_azide#0;	0.0345	1203.67	1203.67	0.00327	2.71	TRUE
	3	TPVSEKVTK	6,HTL_AC_azide#0;	0.0617	1203.67	1203.67	0.00382	3.18	TRUE
	2	TPVSEKVTK	6,HTL_AC_azide#0;	0.124	1203.67	1203.67	0.00375	3.12	TRUE
	3	TPVSEKVTKCCTESLVNR	6,HTL_AC_azide#0;9,HTL_AC_azide#0;	0.0232	2424.24	2424.2	0.03929	16.21	TRUE
	4	TPVSEKVTKCCTESLVNR	6,HTL_AC_azide#0;9,HTL_AC_azide#0;	0.122	2424.23	2424.2	0.03237	13.35	TRUE
	3	SQYLQQCPFDEHVKLVNELTEFAK	7,Carbamidomethyl[C]#0;14,HTL_AC_azide#0;	0.00995	3138.53	3138.53	0.00506	1.61	TRUE
	4	SQYLQQCPFDEHVKLVNELTEFAK	7,Carbamidomethyl[C]#0;14,HTL_AC_azide#0;	0.151	3138.53	3138.53	0.00338	1.08	TRUE
	2	ATEEQLKTVMENFVAFVDK	7,HTL_AC_azide#0;	7.32e-08	2414.2	2414.2	0.00599	2.48	TRUE
	3	ATEEQLKTVMENFVAFVDK	7,HTL_AC_azide#0;	6.45e-07	2414.2	2414.2	0.00553	2.29	TRUE
	4	ATEEQLKTVMENFVAFVDK	7,HTL_AC_azide#0;	1.47e-05	2414.2	2414.2	0.00331	1.37	TRUE
	2	LSQKFPKAEFVEVTK	7,HTL_AC_azide#0;	0.000101	1966.07	1966.07	0.00288	1.47	TRUE
	2	LSQKFPKAEFVEVTK	7,HTL_AC_azide#0;	0.00108	1966.07	1966.07	0.00321	1.63	TRUE
	4	LSQKFPKAEFVEVTK	7,HTL_AC_azide#0;	0.00147	1966.08	1966.07	0.00536	2.73	TRUE
	4	LSQKFPKAEFVEVTK	7,HTL_AC_azide#0;	0.00365	1966.08	1966.07	0.00558	2.84	TRUE
	3	LSQKFPKAEFVEVTK	7,HTL_AC_azide#0;	0.00419	1966.08	1966.07	0.00465	2.36	TRUE
	2	LSQKFPKAEFVEVTK	7,HTL_AC_azide#0;	0.00433	1966.07	1966.07	0.00181	0.92	TRUE
	3	LSQKFPKAEFVEVTK	7,HTL_AC_azide#0;	0.00453	1966.07	1966.07	0.00277	1.41	TRUE
	4	LSQKFPKAEFVEVTK	7,HTL_AC_azide#0;	0.00513	1966.08	1966.07	0.00497	2.53	TRUE
	2	LSQKFPKAEFVEVTK	7,HTL_AC_azide#0;	0.00586	1966.08	1966.07	0.00424	2.16	TRUE
	3	LSQKFPKAEFVEVTK	7,HTL_AC_azide#0;	0.0066	1966.08	1966.07	0.00392	1.99	TRUE
	2	LVTDLTKVHK	7,HTL_AC_azide#0;	0.00728	1368.79	1368.79	0.00241	1.76	TRUE
	3	ATEEQLKTVMENFVAFVDK	7,HTL_AC_azide#0;	0.015	2414.18	2414.2	-0.01856	-7.69	TRUE
	3	LSQKFPKAEFVEVTK	7,HTL_AC_azide#0;	0.0175	1966.08	1966.07	0.00389	1.98	TRUE
	3	EIAHRFKDLGEEHFK	7,HTL_AC_azide#0;	0.0199	2071.04	2071.04	-0.00783	-3.78	TRUE
	3	LSQKFPKAEFVEVTK	7,HTL_AC_azide#0;	0.0209	1966.08	1966.07	0.00398	2.03	TRUE
	2	LVTDLTKVHK	7,HTL_AC_azide#0;	0.0611	1368.79	1368.79	0.00299	2.18	TRUE
	3	LSQKFPKAEFVEVTK	7,HTL_AC_azide#0;	0.143	1966.08	1966.07	0.00466	2.37	TRUE
	3	LSQKFPKAEFVEVTK	7,HTL_AC_azide#0;	0.144	1966.07	1966.07	0.00317	1.61	TRUE
	2	CCAADDKEACFAVEGPK	7,HTL_AC_azide#0;	0.18	1971.81	1971.83	-0.02065	-10.47	TRUE
	3	LSQKFPKAEFVEVTK	7,HTL_AC_azide#0;	0.193	1966.08	1966.07	0.0037	1.88	TRUE
	2	CCAADDKEACFAVEGPK	7,HTL_AC_azide#0;	0.201	1971.81	1971.83	-0.02003	-10.16	TRUE
	3	CCAADDKEACFAVEGPK	7,HTL_AC_azide#0;10,Carbamidomethyl[C]#0;	0.00525	2028.89	2028.85	0.03353	16.53	TRUE
	3	CCAADDKEACFAVEGPK	7,HTL_AC_azide#0;10,Carbamidomethyl[C]#0;	0.00783	2028.89	2028.85	0.03566	17.58	TRUE
	3	CCAADDKEACFAVEGPK	7,HTL_AC_azide#0;10,Carbamidomethyl[C]#0;	0.0172	2028.89	2028.85	0.03915	19.3	TRUE
	2	CCAADDKEACFAVEGPK	7,HTL_AC_azide#0;10,Carbamidomethyl[C]#0;	0.0295	2028.82	2028.85	-0.03428	-16.9	TRUE
	2	CCAADDKEACFAVEGPK	7,HTL_AC_azide#0;10,Carbamidomethyl[C]#0;	0.152	2028.82	2028.85	-0.03485	-17.18	TRUE
	3	CCAADDKEACFAVEGPK	7,HTL_AC_azide#0;10,Carbamidomethyl[C]#0;	0.4	2028.89	2028.85	0.03331	16.42	TRUE
	3	ATEEQLKTVMENFVAFVDK	7,HTL_AC_azide#0;10,Oxidation[M]#0;	0.000416	2430.2	2430.19	0.00581	2.39	TRUE
	3	ATEEQLKTVMENFVAFVDK	7,HTL_AC_azide#0;10,Oxidation[M]#0;	0.000461	2430.19	2430.19	0.00061	0.25	TRUE
	3	ATEEQLKTVMENFVAFVDK	7,HTL_AC_azide#0;10,Oxidation[M]#0;	0.321	2430.2	2430.19	0.00304	1.25	TRUE
	2	YNGVFQECCQAEDKGACLLPK	8,Carbamidomethyl[C]#0;14,HTL_AC_azide#0;	0.00635	2588.2	2588.17	0.03203	12.38	TRUE
	2	YNGVFQECCQAEDKGACLLPK	8,Carbamidomethyl[C]#0;14,HTL_AC_azide#0;	0.0952	2588.2	2588.17	0.03324	12.84	TRUE
	4	YNGVFQECCQAEDKGACLLPKIETMR	8,Carbamidomethyl[C]#0;14,HTL_AC_azide#0;21,HTL_AC_azide#0;	0.0123	3433.61	3433.58	0.0336	9.79	TRUE
	2	AEFVEVTKLVTDLTK	8,HTL_AC_azide#0;	8.59e-07	1908.04	1908.04	0.00275	1.44	TRUE
	3	AEFVEVTKLVTDLTK	8,HTL_AC_azide#0;	4.44e-06	1908.05	1908.04	0.00652	3.42	TRUE
	3	AEFVEVTKLVTDLTK	8,HTL_AC_azide#0;	1.17e-05	1908.04	1908.04	0.00462	2.42	TRUE
	2	AEFVEVTKLVTDLTK	8,HTL_AC_azide#0;	1.19e-05	1908.04	1908.04	-0.00362	-1.9	TRUE
	3	AEFVEVTKLVTDLTK	8,HTL_AC_azide#0;	2.28e-05	1908.05	1908.04	0.00546	2.86	TRUE
	3	QNCDQFEKLGEYGFQNALIVR	8,HTL_AC_azide#0;	0.000193	2687.29	2687.3	-0.00644	-2.39	TRUE
	2	SEIAHRFKDLGEEHFK	8,HTL_AC_azide#0;	0.000508	2158.08	2158.07	0.00399	1.85	TRUE
	3	QNCDQFEKLGEYGFQNALIVR	8,HTL_AC_azide#0;	0.000545	2687.3	2687.3	0.00679	2.52	TRUE
	3	AEFVEVTKLVTDLTK	8,HTL_AC_azide#0;	0.000552	1908.04	1908.04	0.00328	1.72	TRUE
	2	AEFVEVTKLVTDLTK	8,HTL_AC_azide#0;	0.0027	1908.05	1908.04	0.00536	2.81	TRUE
	4	SEIAHRFKDLGEEHFK	8,HTL_AC_azide#0;	0.0047	2158.08	2158.07	0.00651	3.02	TRUE
	3	SEIAHRFKDLGEEHFK	8,HTL_AC_azide#0;	0.0298	2158.08	2158.07	0.00558	2.59	TRUE
	3	AEFVEVTKLVTDLTK	8,HTL_AC_azide#0;	0.147	1908.04	1908.04	0.00052	0.27	TRUE
	3	QNCDQFEKLGEYGFQNALIVR	8,HTL_AC_azide#0;	0.195	2687.27	2687.3	-0.03003	-11.17	TRUE
	3	AEFVEVTKLVTDLTK	8,HTL_AC_azide#0;	0.251	1908.05	1908.04	0.00598	3.14	TRUE
	3	AEFVEVTKLVTDLTK	8,HTL_AC_azide#0;	0.261	1908.04	1908.04	0.00454	2.38	TRUE
	4	VGTRCCTKPESER	8,HTL_AC_azide#0;	0.275	1680.78	1680.79	-0.00335	-2	TRUE
	3	AEFVEVTKLVTDLTK	8,HTL_AC_azide#0;	0.392	1908.05	1908.04	0.00635	3.33	TRUE
	3	DDSPDLPKLKPDPNTLCDEFK	8,HTL_AC_azide#0;17,Carbamidomethyl[C]#0;	0.000346	2659.27	2659.26	0.00287	1.08	TRUE
	3	ETYGDMADCCEKQEPER	9,Carbamidomethyl[C]#0;10,Carbamidomethyl[C]#0;12,HTL_AC_azide#0;	0.000803	2332.92	2332.92	-0.00051	-0.22	TRUE
	2	ETYGDMADCCEKQEPER	9,Carbamidomethyl[C]#0;10,Carbamidomethyl[C]#0;12,HTL_AC_azide#0;	0.000908	2332.92	2332.92	0.0029	1.24	TRUE
	2	ETYGDMADCCEKQEPER	9,Carbamidomethyl[C]#0;10,Carbamidomethyl[C]#0;12,HTL_AC_azide#0;	0.144	2332.92	2332.92	0.00182	0.78	TRUE
	4	EYEATLEECCAKDDPHACYSTVFDK	9,Carbamidomethyl[C]#0;12,HTL_AC_azide#0;	9.22e-05	3139.34	3139.3	0.03858	12.29	TRUE
	3	EYEATLEECCAKDDPHACYSTVFDKLK	9,Carbamidomethyl[C]#0;12,HTL_AC_azide#0;	0.00221	3380.53	3380.48	0.04747	14.04	TRUE
	3	EYEATLEECCAKDDPHACYSTVFDKLK	9,Carbamidomethyl[C]#0;12,HTL_AC_azide#0;	0.0203	3380.53	3380.48	0.04747	14.04	TRUE
	3	EYEATLEECCAKDDPHACYSTVFDK	9,Carbamidomethyl[C]#0;12,HTL_AC_azide#0;25,HTL_AC_azide#0;	0.271	3354.43	3354.4	0.02914	8.69	TRUE
	3	YNGVFQECCQAEDKGACLLPK	9,Carbamidomethyl[C]#0;14,HTL_AC_azide#0;	0.139	2588.19	2588.17	0.02965	11.46	TRUE
	2	LFTFHADICTLPDTEKQIKK	9,Carbamidomethyl[C]#0;16,HTL_AC_azide#0;	2.26e-07	2620.36	2620.35	0.00553	2.11	TRUE
	2	LFTFHADICTLPDTEKQIK	9,Carbamidomethyl[C]#0;16,HTL_AC_azide#0;	1.62e-06	2492.27	2492.26	0.01055	4.23	TRUE
	2	LFTFHADICTLPDTEKQIK	9,Carbamidomethyl[C]#0;16,HTL_AC_azide#0;	5.2e-06	2492.26	2492.26	0.00677	2.72	TRUE
	3	LFTFHADICTLPDTEKQIKK	9,Carbamidomethyl[C]#0;16,HTL_AC_azide#0;	0.000102	2620.36	2620.35	0.00902	3.44	TRUE
	3	LFTFHADICTLPDTEKQIK	9,Carbamidomethyl[C]#0;16,HTL_AC_azide#0;	0.000177	2492.26	2492.26	0.00571	2.29	TRUE
	3	LFTFHADICTLPDTEKQIK	9,Carbamidomethyl[C]#0;16,HTL_AC_azide#0;	0.00019	2492.26	2492.26	0.00514	2.06	TRUE
	3	LFTFHADICTLPDTEKQIKK	9,Carbamidomethyl[C]#0;16,HTL_AC_azide#0;	0.000283	2620.35	2620.35	-0.00093	-0.35	TRUE
	3	LFTFHADICTLPDTEKQIK	9,Carbamidomethyl[C]#0;16,HTL_AC_azide#0;	0.000351	2492.26	2492.26	0.00427	1.71	TRUE
	3	LFTFHADICTLPDTEKQIK	9,Carbamidomethyl[C]#0;16,HTL_AC_azide#0;	0.000455	2492.26	2492.26	0.00524	2.1	TRUE
	4	LFTFHADICTLPDTEKQIKK	9,Carbamidomethyl[C]#0;16,HTL_AC_azide#0;	0.000556	2620.35	2620.35	0.00329	1.25	TRUE
	4	LFTFHADICTLPDTEKQIK	9,Carbamidomethyl[C]#0;16,HTL_AC_azide#0;	0.00281	2492.26	2492.26	0.00192	0.77	TRUE
	3	LFTFHADICTLPDTEKQIK	9,Carbamidomethyl[C]#0;16,HTL_AC_azide#0;	0.00398	2492.24	2492.26	-0.01396	-5.6	TRUE
	4	LFTFHADICTLPDTEKQIKK	9,Carbamidomethyl[C]#0;16,HTL_AC_azide#0;	0.00436	2620.35	2620.35	-0.00076	-0.29	TRUE
	4	LFTFHADICTLPDTEKQIK	9,Carbamidomethyl[C]#0;16,HTL_AC_azide#0;	0.00449	2492.26	2492.26	0.00474	1.9	TRUE
	4	LFTFHADICTLPDTEKQIK	9,Carbamidomethyl[C]#0;16,HTL_AC_azide#0;	0.00502	2492.26	2492.26	0.00497	1.99	TRUE
	4	LFTFHADICTLPDTEKQIK	9,Carbamidomethyl[C]#0;16,HTL_AC_azide#0;	0.0051	2492.26	2492.26	0.00643	2.58	TRUE
	3	LFTFHADICTLPDTEKQIKK	9,Carbamidomethyl[C]#0;16,HTL_AC_azide#0;	0.00601	2620.36	2620.35	0.00439	1.68	TRUE
	4	LFTFHADICTLPDTEKQIK	9,Carbamidomethyl[C]#0;16,HTL_AC_azide#0;	0.00755	2492.26	2492.26	0.00588	2.36	TRUE
	4	LFTFHADICTLPDTEKQIK	9,Carbamidomethyl[C]#0;16,HTL_AC_azide#0;	0.00981	2492.26	2492.26	0.00797	3.2	TRUE
	3	LFTFHADICTLPDTEKQIK	9,Carbamidomethyl[C]#0;16,HTL_AC_azide#0;	0.0109	2492.26	2492.26	-0.00065	-0.26	TRUE
	3	LFTFHADICTLPDTEKQIKK	9,Carbamidomethyl[C]#0;16,HTL_AC_azide#0;	0.0116	2620.36	2620.35	0.0092	3.51	TRUE
	4	LFTFHADICTLPDTEKQIKK	9,Carbamidomethyl[C]#0;16,HTL_AC_azide#0;	0.0139	2620.35	2620.35	0.00196	0.75	TRUE
	4	LFTFHADICTLPDTEKQIK	9,Carbamidomethyl[C]#0;16,HTL_AC_azide#0;	0.0189	2492.26	2492.26	0.00332	1.33	TRUE
	4	LFTFHADICTLPDTEKQIK	9,Carbamidomethyl[C]#0;16,HTL_AC_azide#0;	0.0238	2492.26	2492.26	0.00417	1.67	TRUE
	4	LFTFHADICTLPDTEKQIK	9,Carbamidomethyl[C]#0;16,HTL_AC_azide#0;	0.0364	2492.26	2492.26	0.00535	2.14	TRUE
	4	LFTFHADICTLPDTEKQIK	9,Carbamidomethyl[C]#0;16,HTL_AC_azide#0;	0.039	2492.26	2492.26	0.00491	1.97	TRUE
	3	LFTFHADICTLPDTEKQIKK	9,Carbamidomethyl[C]#0;16,HTL_AC_azide#0;	0.0705	2620.36	2620.35	0.00972	3.71	TRUE
	4	LFTFHADICTLPDTEKQIKK	9,Carbamidomethyl[C]#0;16,HTL_AC_azide#0;	0.071	2620.35	2620.35	-0.00195	-0.75	TRUE
	3	LFTFHADICTLPDTEKQIK	9,Carbamidomethyl[C]#0;16,HTL_AC_azide#0;	0.091	2492.26	2492.26	0.00459	1.84	TRUE
	4	LFTFHADICTLPDTEKQIK	9,Carbamidomethyl[C]#0;16,HTL_AC_azide#0;	0.0986	2492.26	2492.26	0.00149	0.6	TRUE
	5	LFTFHADICTLPDTEKQIKK	9,Carbamidomethyl[C]#0;16,HTL_AC_azide#0;	0.112	2620.36	2620.35	0.00506	1.93	TRUE
	4	LFTFHADICTLPDTEKQIKK	9,Carbamidomethyl[C]#0;16,HTL_AC_azide#0;	0.119	2620.35	2620.35	-0.0037	-1.41	TRUE
	4	LFTFHADICTLPDTEKQIK	9,Carbamidomethyl[C]#0;16,HTL_AC_azide#0;	0.119	2492.26	2492.26	0.00443	1.78	TRUE
	5	LFTFHADICTLPDTEKQIKK	9,Carbamidomethyl[C]#0;16,HTL_AC_azide#0;	0.125	2620.36	2620.35	0.00745	2.84	TRUE
	5	LFTFHADICTLPDTEKQIKK	9,Carbamidomethyl[C]#0;16,HTL_AC_azide#0;	0.132	2620.36	2620.35	0.00492	1.88	TRUE
	5	LFTFHADICTLPDTEKQIK	9,Carbamidomethyl[C]#0;16,HTL_AC_azide#0;	0.176	2492.26	2492.26	0.00597	2.4	TRUE
	4	LFTFHADICTLPDTEKQIK	9,Carbamidomethyl[C]#0;16,HTL_AC_azide#0;	0.198	2492.26	2492.26	0.00855	3.43	TRUE
	4	LFTFHADICTLPDTEKQIKK	9,Carbamidomethyl[C]#0;16,HTL_AC_azide#0;	0.208	2620.4	2620.35	0.04734	18.07	TRUE
	3	LFTFHADICTLPDTEK	9,Carbamidomethyl[C]#0;16,HTL_AC_azide#0;	0.214	2123.06	2123.02	0.03977	18.73	TRUE
	4	LFTFHADICTLPDTEKQIK	9,Carbamidomethyl[C]#0;16,HTL_AC_azide#0;	0.216	2492.26	2492.26	0.00814	3.27	TRUE
	3	LFTFHADICTLPDTEKQIK	9,Carbamidomethyl[C]#0;16,HTL_AC_azide#0;	0.222	2492.26	2492.26	0.0042	1.69	TRUE
	4	LFTFHADICTLPDTEKQIK	9,Carbamidomethyl[C]#0;16,HTL_AC_azide#0;	0.236	2492.26	2492.26	0.00434	1.74	TRUE
	4	LFTFHADICTLPDTEKQIK	9,Carbamidomethyl[C]#0;16,HTL_AC_azide#0;	0.262	2492.26	2492.26	0.00443	1.78	TRUE
	3	LFTFHADICTLPDTEKQIK	9,Carbamidomethyl[C]#0;16,HTL_AC_azide#0;	0.344	2492.25	2492.26	-0.00196	-0.79	TRUE
	4	LFTFHADICTLPDTEKQIKK	9,Carbamidomethyl[C]#0;16,HTL_AC_azide#0;	0.394	2620.4	2620.35	0.0477	18.2	TRUE
	4	LFTFHADICTLPDTEKQIKK	9,Carbamidomethyl[C]#0;16,HTL_AC_azide#0;	0.409	2620.35	2620.35	-0.00072	-0.27	TRUE
	3	LFTFHADICTLPDTEKQIKK	9,Carbamidomethyl[C]#0;16,HTL_AC_azide#0;19,HTL_AC_azide#0;	0.0891	2835.46	2835.45	0.00679	2.39	TRUE
	5	LFTFHADICTLPDTEKQIKK	9,Carbamidomethyl[C]#0;16,HTL_AC_azide#0;19,HTL_AC_azide#0;	0.285	2835.45	2835.45	0.00419	1.48	TRUE
	3	LFTFHADICTLPDTEKQIKK	9,Carbamidomethyl[C]#0;19,HTL_AC_azide#0;	4.06e-06	2620.35	2620.35	0.00272	1.04	TRUE
	3	LFTFHADICTLPDTEKQIKK	9,Carbamidomethyl[C]#0;19,HTL_AC_azide#0;	0.0011	2620.36	2620.35	0.00815	3.11	TRUE
	3	LFTFHADICTLPDTEKQIKK	9,Carbamidomethyl[C]#0;19,HTL_AC_azide#0;	0.204	2620.36	2620.35	0.00801	3.06	TRUE
	4	SHCIAEVEKDAIPENLPPLTADFAEDKDVCK	9,HTL_AC_azide#0;	2.67e-07	3612.76	3612.73	0.0311	8.61	TRUE
	4	SHCIAEVEKDAIPENLPPLTADFAEDKDVCK	9,HTL_AC_azide#0;	2.03e-06	3612.76	3612.73	0.03733	10.33	TRUE
	5	SHCIAEVEKDAIPENLPPLTADFAEDKDVCK	9,HTL_AC_azide#0;	4.44e-06	3612.76	3612.73	0.03189	8.83	TRUE
	3	SHCIAEVEKDAIPENLPPLTADFAEDKDVCK	9,HTL_AC_azide#0;	1.83e-05	3612.76	3612.73	0.03793	10.5	TRUE
	5	SHCIAEVEKDAIPENLPPLTADFAEDKDVCK	9,HTL_AC_azide#0;	0.00018	3612.77	3612.73	0.04139	11.46	TRUE
	4	SHCIAEVEKDAIPENLPPLTADFAEDKDVCK	9,HTL_AC_azide#0;	0.000655	3612.76	3612.73	0.03799	10.52	TRUE
	4	SHCIAEVEKDAIPENLPPLTADFAEDKDVCK	9,HTL_AC_azide#0;	0.00138	3612.76	3612.73	0.03669	10.15	TRUE
	3	SHCIAEVEKDAIPENLPPLTADFAEDKDVCK	9,HTL_AC_azide#0;	0.0034	3612.77	3612.73	0.04047	11.2	TRUE
	4	SHCIAEVEKDAIPENLPPLTADFAEDKDVCK	9,HTL_AC_azide#0;	0.00404	3612.76	3612.73	0.03464	9.59	TRUE
	4	SHCIAEVEKDAIPENLPPLTADFAEDKDVCK	9,HTL_AC_azide#0;	0.00516	3612.77	3612.73	0.04531	12.54	TRUE
	5	SHCIAEVEKDAIPENLPPLTADFAEDKDVCK	9,HTL_AC_azide#0;	0.38	3612.76	3612.73	0.0296	8.19	TRUE
	4	TPVSEKVTKCCTESLVNR	9,HTL_AC_azide#0;10,Carbamidomethyl[C]#0;11,Carbamidomethyl[C]#0;	5.13e-05	2323.15	2323.15	0.007	3.01	TRUE
	3	TPVSEKVTKCCTESLVNR	9,HTL_AC_azide#0;10,Carbamidomethyl[C]#0;11,Carbamidomethyl[C]#0;	8.66e-05	2323.15	2323.15	0.0047	2.02	TRUE
	2	TPVSEKVTKCCTESLVNR	9,HTL_AC_azide#0;10,Carbamidomethyl[C]#0;11,Carbamidomethyl[C]#0;	0.000102	2323.15	2323.15	0.00485	2.09	TRUE
	3	TPVSEKVTKCCTESLVNR	9,HTL_AC_azide#0;10,Carbamidomethyl[C]#0;11,Carbamidomethyl[C]#0;	0.00047	2323.15	2323.15	0.00592	2.55	TRUE
	3	TPVSEKVTKCCTESLVNR	9,HTL_AC_azide#0;10,Carbamidomethyl[C]#0;11,Carbamidomethyl[C]#0;	0.000528	2323.14	2323.15	-0.00258	-1.11	TRUE
	3	TPVSEKVTKCCTESLVNR	9,HTL_AC_azide#0;10,Carbamidomethyl[C]#0;11,Carbamidomethyl[C]#0;	0.0102	2323.14	2323.15	-0.00267	-1.15	TRUE
	4	TPVSEKVTKCCTESLVNR	9,HTL_AC_azide#0;10,Carbamidomethyl[C]#0;11,Carbamidomethyl[C]#0;	0.0184	2323.15	2323.15	0.00042	0.18	TRUE
	3	TPVSEKVTKCCTESLVNR	9,HTL_AC_azide#0;10,Carbamidomethyl[C]#0;11,Carbamidomethyl[C]#0;	0.0504	2323.15	2323.15	0.00493	2.12	TRUE
	3	TPVSEKVTKCCTESLVNR	9,HTL_AC_azide#0;10,Carbamidomethyl[C]#0;11,Carbamidomethyl[C]#0;	0.314	2323.15	2323.15	0.00254	1.09	TRUE
	4	SHCIAEVEKDAIPENLPPLTADFAEDKDVCK	9,HTL_AC_azide#0;30,Carbamidomethyl[C]#0;	0.00281	3669.8	3669.75	0.04816	13.12	TRUE
	4	SHCIAEVEKDAIPENLPPLTADFAEDKDVCK	9,HTL_AC_azide#0;30,Carbamidomethyl[C]#0;	0.0892	3669.81	3669.75	0.06373	17.37	TRUE
	3	SHCIAEVEKDAIPENLPPLTADFAEDKDVCK	9,HTL_AC_azide#0;30,Carbamidomethyl[C]#0;	0.157	3669.81	3669.75	0.06102	16.63	TRUE
